# Supplementary material for: The Warning Lexicon: A Multiphased Study to Identify, Design, and Develop Content for Warning Messages
Source: Atypon-hosted journal article supplement (doi:10.1061/nhrefo.nheng-1900), 2023-10-30
Supplement: supplemental_materials_nhrefo.nheng-1900_sutton.pdf [file supplemental_materials_nhrefo.nheng-1900_sutton.pdf]

## SUPPLEMENTAL MATERIALS

*ASCE Natural Hazards Review*

# The Warning Lexicon: A Multiphased Study to Identify, Design, and Develop Content for Warning Messages

Jeannette Sutton, Michele K. Olson, and Nicholas A. Waugh

**DOI:** 10.1061/NHREFO.NHENG-1900

© ASCE 2023

[www.ascelibrary.org](http://www.ascelibrary.org)

## Appendix S1. Warning Lexicon

The following is provided as reference material for each hazard included in the Warning Lexicon. Research-informed message writing prompts are offered, and related content is supplied for message writers. Where relevant, message content is provided for pre-event messaging and during/ post-event messaging. An example message template is also provided for both time frames for each hazard where applicable. Example messages draw entirely from the Warning Lexicon content except for words in italics, which generally represent [*source*], [*location*], and [*information/URL/phone number*]. These types of information should be provided by the message writer. In most cases, each example template also includes a placeholder for time (## (AM/PM)).

To use this supplemental material, message writers should follow the prompts for each message writing step and select the relevant content from the table for that hazard. Where multiple options are provided within brackets, writers should select one option (e.g. [injured/in danger/trapped/buried/have an emergency]).

*Note.* Example message templates have not been tested with the public. They are provided to demonstrate how to use the Warning Lexicon to build a complete message. Example messages have also not been edited to fit within character restrictions and may exceed 360 characters.

## Table of Contents

|                                                         |           |
|---------------------------------------------------------|-----------|
| <b>GEOPHYSICAL HAZARDS .....</b>                        | <b>6</b>  |
| AVALANCHE.....                                          | 6         |
| EARTHQUAKE (Post-Event, Aftershock Communication) ..... | 9         |
| LANDSLIDE .....                                         | 12        |
| MUD/DEBRIS FLOW.....                                    | 15        |
| ROCK FALL .....                                         | 18        |
| SINK HOLE.....                                          | 20        |
| VOLCANO.....                                            | 22        |
| <b>ATMOSPHERIC HAZARDS.....</b>                         | <b>26</b> |
| BLIZZARD.....                                           | 26        |
| DUST STORM .....                                        | 28        |
| EXTREME COLD.....                                       | 31        |
| EXTREME HEAT .....                                      | 34        |
| FLASH FLOOD.....                                        | 37        |
| FOG.....                                                | 40        |
| HAIL.....                                               | 42        |
| HEAVY SNOW.....                                         | 44        |

HEAVY RAIN..... 46

HIGH WINDS ..... 48

HURRICANE/TROPICAL CYCLONE/TROPICAL STORM..... 50

ICE STORM ..... 53

SEVERE THUNDERSTORM..... 55

SNOW SQUALL ..... 58

STORM SURGE..... 60

TORNADO..... 63

TSUNAMI ..... 66

WINTER STORM ..... 69

**TECHNOLOGICAL HAZARDS..... 71**

BRIDGE COLLAPSE ..... 71

BUILDING COLLAPSE ..... 73

BUILDING FIRE..... 76

CHEMICAL RELEASE..... 78

DAM/LEVEE FAILURE..... 81

EXPLOSION ..... 84

HAZARDOUS MATERIALS RELEASE ..... 87

INDUSTRIAL PLANT FIRE..... 90

RADIOLOGICAL RELEASE/ACCIDENT ..... 93

TOXIC FUMES ..... 96

**LAW ENFORCEMENT HAZARDS..... 99**

    ACTIVE SHOOTER ..... 99

    BOMB THREAT ..... 102

    CIVIL DISTURBANCE..... 104

    HOSTAGE TAKING..... 106

    LAW ENFORCEMENT ACTIVITY ..... 108

    SUSPECT IN AREA ..... 110

**PUBLIC HEALTH HAZARDS..... 112**

    AIR QUALITY ..... 112

    BIO (BIOLOGICAL) HAZARD ..... 114

    INFECTIOUS DISEASE/NOVEL PANDEMIC ..... 117

**PUBLIC SAFETY HAZARDS ..... 119**

    911 SERVICE OUTAGE ..... 119

    BLACKOUT/BROWNOUT/POWER OUTAGE ..... 121

WATER SERVICE DISRUPTION..... 124

**WILDFIRE..... 126**

## GEOPHYSICAL HAZARDS

### AVALANCHE

| MESSAGE WRITING STEPS                                                                                                                  | PRE-EVENT CONTENT                                                                                                                                              | DURING OR POST-EVENT CONTENT                                                                                                                        |
|----------------------------------------------------------------------------------------------------------------------------------------|----------------------------------------------------------------------------------------------------------------------------------------------------------------|-----------------------------------------------------------------------------------------------------------------------------------------------------|
| 1. SOURCE: Which agency should be listed as the source of this message?                                                                | <i>Select a source that is familiar and trusted. Do not use an acronym for the source.</i>                                                                     | <i>Select a source that is familiar and trusted. Do not use an acronym for the source.</i>                                                          |
| 2. HAZARD: What type of hazardous event is happening or about to happen?                                                               | AVALANCHE                                                                                                                                                      | AVALANCHE                                                                                                                                           |
| 3. HAZARD IMPACTS: What are the consequences of this threat that the public should be aware of or how will it affect them personally?  | There is the potential for AVALANCHE in [location]. Avalanches can occur quickly, causing injury or death and can impact roads and property in affected areas. | An AVALANCHE has occurred in [location]. Avalanches can occur quickly, causing injury or death and can impact roads and property in affected areas. |
| 4. HAZARD LOCATION: Where is the hazardous event occurring? If the hazard is moving, in what direction is it moving or likely to move? | <i>Select well-known landmarks; town/city/county (all or portion); major road(s)/intersection(s).</i>                                                          | <i>Select well-known landmarks; town/city/county (all or portion); major road(s)/intersection(s).</i>                                               |
| 5. RESPONSE LOCATION: Is there a specific location that should be evacuated or avoided by people? If so, where should they go?         | <i>Select well-known landmarks; town/city/county (all or portion); major road(s)/intersection(s).</i>                                                          | <i>Select well-known landmarks; town/city/county (all or portion); major road(s)/intersection(s).</i>                                               |
| 6. PROTECTIVE ACTION GUIDANCE: What are the specific                                                                                   | <ul style="list-style-type: none"> <li>• AVOID area around [location] until further notice</li> </ul>                                                          | <ul style="list-style-type: none"> <li>• AVOID area around [location] until further notice</li> </ul>                                               |

|                                                                              |                                                                                                                                                                                                                                                                                                                                                                                                                                                                                                                         |                                                                                                                                                                                                                                                                                                                                                                                                                                                      |
|------------------------------------------------------------------------------|-------------------------------------------------------------------------------------------------------------------------------------------------------------------------------------------------------------------------------------------------------------------------------------------------------------------------------------------------------------------------------------------------------------------------------------------------------------------------------------------------------------------------|------------------------------------------------------------------------------------------------------------------------------------------------------------------------------------------------------------------------------------------------------------------------------------------------------------------------------------------------------------------------------------------------------------------------------------------------------|
| actions people receiving the message should take?                            | <ul style="list-style-type: none"> <li>• AVOID steep, unstable, [and/or] open and exposed slopes</li> <li>• CONTACT [source] to report [information/exposure/suspicious activity/suspect, etc.] at [contact info]</li> <li>• DO NOT enter [location]</li> <li>• DO NOT return to area after evacuation [until/unless] [authorized/directed] by local officials</li> <li>• FOLLOW instructions from [source]</li> <li>• LEAVE areas near [location]</li> <li>• STAY away from [location] until further notice</li> </ul> | <ul style="list-style-type: none"> <li>• CALL or text [phone number] if you or others are [injured/in danger/trapped/buried/have an emergency]</li> <li>• FOLLOW instructions from [source]</li> <li>• DO NOT enter [location]</li> <li>• STAY away from [location] until further notice</li> <li>• DO NOT return to area after evacuation [until/unless] [authorized/directed] by local officials</li> <li>• LEAVE areas near [location]</li> </ul> |
| 7. TIME: When should people take protective action? Will the message expire? | NOW; before ## (AM/PM); until ## (AM/PM)                                                                                                                                                                                                                                                                                                                                                                                                                                                                                | NOW; before ## (AM/PM); until ## (AM/PM)                                                                                                                                                                                                                                                                                                                                                                                                             |
| 8. ADDITIONAL GUIDANCE: Where should people go for updates?                  | <ul style="list-style-type: none"> <li>• CHECK [source] for [updates/information] at [info]</li> </ul>                                                                                                                                                                                                                                                                                                                                                                                                                  | <ul style="list-style-type: none"> <li>• CHECK [source] for [updates/information] at [info]</li> </ul>                                                                                                                                                                                                                                                                                                                                               |

### Pre-event Message Template

- [Source] There is the potential for AVALANCHE in [location] until ## (AM/PM). Avalanches can occur quickly, causing injury or death and can impact roads and property in affected areas. LEAVE areas near [location]. DO NOT return to area after evacuation [until/unless] [authorized/directed] by local officials.

### During/Post Event Message Template



- [*Source*] An AVALANCHE has occurred in [*location*] at ## (AM/PM). Avalanches can occur quickly, causing injury or death and can impact roads and property in affected areas. AVOID area around [*location*] until further notice. CALL or text [*phone number*] if you or others are [*injured/in danger/trapped/buried/have an emergency*].

**EARTHQUAKE (Post-Event, Aftershock Communication)**

| MESSAGE WRITING STEPS                                                                                                                  | PRE-EVENT CONTENT                                                                                                                                                                                                         | DURING OR POST-EVENT CONTENT                                                                                                                                                                                              |
|----------------------------------------------------------------------------------------------------------------------------------------|---------------------------------------------------------------------------------------------------------------------------------------------------------------------------------------------------------------------------|---------------------------------------------------------------------------------------------------------------------------------------------------------------------------------------------------------------------------|
| 1. SOURCE: Which agency should be listed as the source of this message?                                                                | <i>Select a source that is familiar and trusted. Do not use an acronym for the source.</i>                                                                                                                                | <i>Select a source that is familiar and trusted. Do not use an acronym for the source.</i>                                                                                                                                |
| 2. HAZARD: What type of hazardous event is happening or about to happen?                                                               | EARTHQUAKE                                                                                                                                                                                                                | EARTHQUAKE                                                                                                                                                                                                                |
| 3. HAZARD IMPACTS: What are the consequences of this threat that the public should be aware of or how will it affect them personally?  | An EARTHQUAKE occurred in [location]. There is a high risk of injury or death from being struck by falling objects, electrocution from downed power lines, and fires from broken gas lines. Aftershocks [may/will] occur. | An EARTHQUAKE occurred in [location]. There is a high risk of injury or death from being struck by falling objects, electrocution from downed power lines, and fires from broken gas lines. Aftershocks [may/will] occur. |
| 4. HAZARD LOCATION: Where is the hazardous event occurring? If the hazard is moving, in what direction is it moving or likely to move? | <i>Select well-known landmarks; town/city/county (all or portion); major road(s)/intersection(s).</i>                                                                                                                     | <i>Select well-known landmarks; town/city/county (all or portion); major road(s)/intersection(s).</i>                                                                                                                     |
| 5. RESPONSE LOCATION: Is there a specific location that should be evacuated or avoided by people? If so, where should they go?         | <i>Select well-known landmarks; town/city/county (all or portion); major road(s)/intersection(s).</i>                                                                                                                     | <i>Select well-known landmarks; town/city/county (all or portion); major road(s)/intersection(s).</i>                                                                                                                     |
| 6. PROTECTIVE ACTION GUIDANCE: What are the specific                                                                                   | <ul style="list-style-type: none"> <li>• AVOID [downed trees, anything that may be touching downed power lines, and debris]</li> </ul>                                                                                    | <ul style="list-style-type: none"> <li>• AVOID [downed trees, anything that may be touching downed power lines, and debris]</li> </ul>                                                                                    |

|                                                                                     |                                                                                                                                                                                                                                                                                                                                                                                                                                                                                                                                                                                                                                                                                                                                                                                                                                                                         |                                                                                                                                                                                                                                                                                                                                                                                                                                                                                                                                                                                                                                                                                                                                                                                                                                                                                                                                                                                                 |
|-------------------------------------------------------------------------------------|-------------------------------------------------------------------------------------------------------------------------------------------------------------------------------------------------------------------------------------------------------------------------------------------------------------------------------------------------------------------------------------------------------------------------------------------------------------------------------------------------------------------------------------------------------------------------------------------------------------------------------------------------------------------------------------------------------------------------------------------------------------------------------------------------------------------------------------------------------------------------|-------------------------------------------------------------------------------------------------------------------------------------------------------------------------------------------------------------------------------------------------------------------------------------------------------------------------------------------------------------------------------------------------------------------------------------------------------------------------------------------------------------------------------------------------------------------------------------------------------------------------------------------------------------------------------------------------------------------------------------------------------------------------------------------------------------------------------------------------------------------------------------------------------------------------------------------------------------------------------------------------|
| <p>actions people receiving the message should take?</p>                            | <ul style="list-style-type: none"> <li>• AVOID anything that could fall, such as lighting fixtures, furniture, or shelving</li> <li>• AVOID area around [<i>location</i>] until further notice</li> <li>• CALL or text [<i>phone number</i>] if you or others are [injured/in danger/trapped/buried/have an emergency]</li> <li>• DO NOT leave the building until after shaking has stopped</li> <li>• IF [BURIED, TRAPPED], tap on a pipe or wall so rescuers can locate you. Shout only as a last resort to protect your breathing</li> <li>• LOOK around and extinguish small fires in your immediate area [<i>info</i>]</li> <li>• STAY away from [<i>location</i>] until further notice</li> <li>• WHEN YOU FEEL SHAKING, drop to the ground, cover your head and neck, and hold onto something sturdy. DO NOT run outside or move while shaking occurs</li> </ul> | <ul style="list-style-type: none"> <li>• AVOID anything that could fall, such as lighting fixtures, furniture, or shelving</li> <li>• AVOID area around [<i>location</i>] until further notice</li> <li>• CALL or text [<i>phone number</i>] if you or others are [injured/in danger/trapped/buried/have an emergency]</li> <li>• DO NOT leave the building until after shaking has stopped</li> <li>• IF [BURIED, TRAPPED], tap on a pipe or wall so rescuers can locate you. Shout only as a last resort to protect your breathing</li> <li>• LOOK around and extinguish small fires in your immediate area [<i>info</i>]</li> <li>• STAY away from [<i>location</i>] until further notice</li> <li>• WHEN YOU FEEL SHAKING, drop to the ground, cover your head and neck, and hold onto something sturdy. DO NOT run outside or move while shaking occurs</li> <li>• SAFELY clean up spilled medicines, bleaches, gasoline, and other flammable liquids immediately [<i>info</i>]</li> </ul> |
| <p>7. TIME: When should people take protective action? Will the message expire?</p> | <p>NOW; before ## (AM/PM); until ## (AM/PM)</p>                                                                                                                                                                                                                                                                                                                                                                                                                                                                                                                                                                                                                                                                                                                                                                                                                         | <p>NOW; before ## (AM/PM); until ## (AM/PM)</p>                                                                                                                                                                                                                                                                                                                                                                                                                                                                                                                                                                                                                                                                                                                                                                                                                                                                                                                                                 |

|                                                                |                                                                                                                                                                                                             |                                                                                                                                                                                                             |
|----------------------------------------------------------------|-------------------------------------------------------------------------------------------------------------------------------------------------------------------------------------------------------------|-------------------------------------------------------------------------------------------------------------------------------------------------------------------------------------------------------------|
| 8. ADDITIONAL GUIDANCE:<br>Where should people go for updates? | <ul style="list-style-type: none"> <li>• CHECK <i>[source]</i> for [updates/information] at <i>[info]</i></li> <li>• CHECK for and report gas leaks when returning to area <i>[contact info]</i></li> </ul> | <ul style="list-style-type: none"> <li>• CHECK <i>[source]</i> for [updates/information] at <i>[info]</i></li> <li>• CHECK for and report gas leaks when returning to area <i>[contact info]</i></li> </ul> |
|----------------------------------------------------------------|-------------------------------------------------------------------------------------------------------------------------------------------------------------------------------------------------------------|-------------------------------------------------------------------------------------------------------------------------------------------------------------------------------------------------------------|

### Pre-event Message Template

- *[Source]* An EARTHQUAKE occurred in *[location]* at ## (AM/PM). There is a high risk of injury or death from being struck by falling objects, electrocution from downed power lines, and fires from broken gas lines. Aftershocks [may/will] occur. WHEN YOU FEEL SHAKING, drop to the ground, cover your head and neck, and hold onto something sturdy. DO NOT run outside or move while shaking occurs. CHECK *[source]* for [updates/information] at *[info]*.

### During/Post Event Message Template

- *[Source]* An EARTHQUAKE occurred in *[location]* at ## (AM/PM). SAFELY clean up spilled medicines, bleaches, gasoline, and other flammable liquids immediately *[info]*. CHECK *[source]* for [updates/information] at *[info]*.

**LANDSLIDE**

| MESSAGE WRITING STEPS                                                                                                                  | PRE-EVENT CONTENT                                                                                                                                                                                    | DURING OR POST-EVENT CONTENT                                                                                                                                                            |
|----------------------------------------------------------------------------------------------------------------------------------------|------------------------------------------------------------------------------------------------------------------------------------------------------------------------------------------------------|-----------------------------------------------------------------------------------------------------------------------------------------------------------------------------------------|
| 1. SOURCE: Which agency should be listed as the source of this message?                                                                | <i>Select a source that is familiar and trusted. Do not use an acronym for the source.</i>                                                                                                           | <i>Select a source that is familiar and trusted. Do not use an acronym for the source.</i>                                                                                              |
| 2. HAZARD: What type of hazardous event is happening or about to happen?                                                               | LANDSLIDE                                                                                                                                                                                            | LANDSLIDE                                                                                                                                                                               |
| 3. HAZARD IMPACTS: What are the consequences of this threat that the public should be aware of or how will it affect them personally?  | LANDSLIDE risk in [location] has increased due to recent [weather/earthquake]. Landslides can occur quickly, causing injury or death, destruction to roads, bridges, and property in affected areas. | LANDSLIDE has occurred in [location]. Additional landslides are possible and can occur quickly, causing injury or death, destruction to roads, bridges, and property in affected areas. |
| 4. HAZARD LOCATION: Where is the hazardous event occurring? If the hazard is moving, in what direction is it moving or likely to move? | <i>Select well-known landmarks; town/city/county (all or portion); major road(s)/intersection(s).</i>                                                                                                | <i>Select well-known landmarks; town/city/county (all or portion); major road(s)/intersection(s).</i>                                                                                   |
| 5. RESPONSE LOCATION: Is there a specific location that should be evacuated or avoided by people? If so, where should they go?         | <i>Select well-known landmarks; town/city/county (all or portion); major road(s)/intersection(s).</i>                                                                                                | <i>Select well-known landmarks; town/city/county (all or portion); major road(s)/intersection(s).</i>                                                                                   |
| 6. PROTECTIVE ACTION GUIDANCE: What are the specific                                                                                   | <ul style="list-style-type: none"> <li>• AVOID area around [location] until further notice</li> </ul>                                                                                                | <ul style="list-style-type: none"> <li>• AVOID [downed trees, anything that may be touching downed power lines, and debris]</li> </ul>                                                  |

|                                                          |                                                                                                                                                                                                                                                                                                                                                                                                                                                                                                                                                                                                                                                                                                                                                                                                                                                                                                                                                                    |                                                                                                                                                                                                                                                                                                                                                                                                                                                                                                                                                                                                                                                                                                         |
|----------------------------------------------------------|--------------------------------------------------------------------------------------------------------------------------------------------------------------------------------------------------------------------------------------------------------------------------------------------------------------------------------------------------------------------------------------------------------------------------------------------------------------------------------------------------------------------------------------------------------------------------------------------------------------------------------------------------------------------------------------------------------------------------------------------------------------------------------------------------------------------------------------------------------------------------------------------------------------------------------------------------------------------|---------------------------------------------------------------------------------------------------------------------------------------------------------------------------------------------------------------------------------------------------------------------------------------------------------------------------------------------------------------------------------------------------------------------------------------------------------------------------------------------------------------------------------------------------------------------------------------------------------------------------------------------------------------------------------------------------------|
| <p>actions people receiving the message should take?</p> | <ul style="list-style-type: none"> <li>• BE READY to [evacuate/leave] [location] when advised by local officials</li> <li>• CALL or text [phone number] if you or others are [injured/in danger/trapped/buried/have an emergency]</li> <li>• DO NOT enter [location]</li> <li>• DO NOT return to area after evacuation [until/unless] [authorized/directed] by local officials</li> <li>• DO NOT walk or drive through moving water or on flooded roadways</li> <li>• FOLLOW evacuation orders [info]</li> <li>• FOLLOW instructions from [source]</li> <li>• IF IN A LOW-LYING AREA, move to higher ground</li> <li>• IF DRIVING, do not drive around a barricade or on closed roads</li> <li>• LEAVE areas near [location]</li> <li>• LISTEN for any unusual sounds that might indicate moving debris, such as trees cracking or boulders knocking together</li> <li>• STAY alert and awake</li> <li>• STAY away from [location] until further notice</li> </ul> | <ul style="list-style-type: none"> <li>• AVOID area around [location] until further notice</li> <li>• CALL or text [phone number] if you or others are [injured/in danger/trapped/buried/have an emergency]</li> <li>• FOLLOW instructions from [source]</li> <li>• FOLLOW evacuation orders [info]</li> <li>• LEAVE areas near [location] STAY away from [location] until further notice</li> <li>• DO NOT enter [location]</li> <li>• DO NOT walk or drive through moving water or on flooded roadways</li> <li>• DO NOT return to area after evacuation [until/unless] [authorized/directed] by local officials</li> <li>• IF DRIVING, do not drive around a barricade or on closed roads</li> </ul> |
|----------------------------------------------------------|--------------------------------------------------------------------------------------------------------------------------------------------------------------------------------------------------------------------------------------------------------------------------------------------------------------------------------------------------------------------------------------------------------------------------------------------------------------------------------------------------------------------------------------------------------------------------------------------------------------------------------------------------------------------------------------------------------------------------------------------------------------------------------------------------------------------------------------------------------------------------------------------------------------------------------------------------------------------|---------------------------------------------------------------------------------------------------------------------------------------------------------------------------------------------------------------------------------------------------------------------------------------------------------------------------------------------------------------------------------------------------------------------------------------------------------------------------------------------------------------------------------------------------------------------------------------------------------------------------------------------------------------------------------------------------------|

|                                                                              |                                                                                                      |                                                                                                      |
|------------------------------------------------------------------------------|------------------------------------------------------------------------------------------------------|------------------------------------------------------------------------------------------------------|
| 7. TIME: When should people take protective action? Will the message expire? | NOW; before ## (AM/PM); until ## (AM/PM)                                                             | NOW; before ## (AM/PM); until ## (AM/PM)                                                             |
| 8. ADDITIONAL GUIDANCE: Where should people go for updates?                  | <ul style="list-style-type: none"> <li>CHECK [source] for [updates/information] at [info]</li> </ul> | <ul style="list-style-type: none"> <li>CHECK [source] for [updates/information] at [info]</li> </ul> |

### Pre-event Message Template

- [Source] LANDSLIDE risk in [location] has increased due to recent [weather/earthquake]. Landslides can occur quickly, causing injury or death, destruction to roads, bridges, and property in affected areas. BE READY to [evacuate/leave] [location] when advised by local officials. LISTEN for any unusual sounds that might indicate moving debris, such as trees cracking or boulders knocking together.

### During/Post Event Message Template

- [Source] A LANDSLIDE has occurred in [location] at ## (AM/PM). Additional landslides are possible and can occur quickly, causing injury or death, destruction to roads, bridges, and property in affected areas. LEAVE areas near [location] NOW. DO NOT return to area after evacuation [until/unless] [authorized/directed] by local officials. CHECK [source] for [updates/information] at [info].

**MUD/DEBRIS FLOW**

| MESSAGE WRITING STEPS                                                                                                                  | PRE-EVENT CONTENT                                                                                                                                                                                                           | DURING OR POST-EVENT CONTENT                                                                                                                                                                                  |
|----------------------------------------------------------------------------------------------------------------------------------------|-----------------------------------------------------------------------------------------------------------------------------------------------------------------------------------------------------------------------------|---------------------------------------------------------------------------------------------------------------------------------------------------------------------------------------------------------------|
| 1. SOURCE: Which agency should be listed as the source of this message?                                                                | <i>Select a source that is familiar and trusted. Do not use an acronym for the source.</i>                                                                                                                                  | <i>Select a source that is familiar and trusted. Do not use an acronym for the source.</i>                                                                                                                    |
| 2. HAZARD: What type of hazardous event is happening or about to happen?                                                               | MUD/DEBRIS FLOW                                                                                                                                                                                                             | MUD/DEBRIS FLOW                                                                                                                                                                                               |
| 3. HAZARD IMPACTS: What are the consequences of this threat that the public should be aware of or how will it affect them personally?  | [MUDFLOW/DEBRIS FLOW] risk in [location] has increased due to recent [weather/earthquake]. [Mudflow/debris flow] can occur quickly, causing injury or death, destruction to roads, bridges, and property in affected areas. | [MUDFLOW/DEBRIS FLOW] has occurred in [location]. Additional [mudflow/debris flow] is possible and can occur quickly, causing injury or death, destruction to roads, bridges, and property in affected areas. |
| 4. HAZARD LOCATION: Where is the hazardous event occurring? If the hazard is moving, in what direction is it moving or likely to move? | <i>Select well-known landmarks; town/city/county (all or portion); major road(s)/intersection(s).</i>                                                                                                                       | <i>Select well-known landmarks; town/city/county (all or portion); major road(s)/intersection(s).</i>                                                                                                         |
| 5. RESPONSE LOCATION: Is there a specific location that should be evacuated or avoided by people? If so, where should they go?         | <i>Select well-known landmarks; town/city/county (all or portion); major road(s)/intersection(s).</i>                                                                                                                       | <i>Select well-known landmarks; town/city/county (all or portion); major road(s)/intersection(s).</i>                                                                                                         |
| 6. PROTECTIVE ACTION GUIDANCE: What are the specific actions people receiving the message should take?                                 | <ul style="list-style-type: none"> <li>• AVOID area around [location] until further notice</li> </ul>                                                                                                                       | <ul style="list-style-type: none"> <li>• AVOID [downed trees, anything that may be touching downed power lines, and debris]</li> </ul>                                                                        |



|  |                                                                                                                                                                                                                                                                                                                                                                                                                                                                                                                                                                                                                                                                                                                                                                                                                                                                                                                                                                    |                                                                                                                                                                                                                                                                                                                                                                                                                                                                                                                                                                                                                                                                                                                    |
|--|--------------------------------------------------------------------------------------------------------------------------------------------------------------------------------------------------------------------------------------------------------------------------------------------------------------------------------------------------------------------------------------------------------------------------------------------------------------------------------------------------------------------------------------------------------------------------------------------------------------------------------------------------------------------------------------------------------------------------------------------------------------------------------------------------------------------------------------------------------------------------------------------------------------------------------------------------------------------|--------------------------------------------------------------------------------------------------------------------------------------------------------------------------------------------------------------------------------------------------------------------------------------------------------------------------------------------------------------------------------------------------------------------------------------------------------------------------------------------------------------------------------------------------------------------------------------------------------------------------------------------------------------------------------------------------------------------|
|  | <ul style="list-style-type: none"> <li>• BE READY to [evacuate/leave] [location] when advised by local officials</li> <li>• CALL or text [phone number] if you or others are [injured/in danger/trapped/buried/have an emergency]</li> <li>• DO NOT enter [location]</li> <li>• DO NOT return to area after evacuation [until/unless] [authorized/directed] by local officials</li> <li>• DO NOT walk or drive through moving water or on flooded roadways</li> <li>• FOLLOW evacuation orders [info]</li> <li>• FOLLOW instructions from [source]</li> <li>• IF IN A LOW-LYING AREA, move to higher ground</li> <li>• IF DRIVING, do not drive around a barricade or on closed roads</li> <li>• LEAVE areas near [location]</li> <li>• LISTEN for any unusual sounds that might indicate moving debris, such as trees cracking or boulders knocking together</li> <li>• STAY alert and awake</li> <li>• STAY away from [location] until further notice</li> </ul> | <ul style="list-style-type: none"> <li>• AVOID area around [location] until further notice</li> <li>• CALL or text [phone number] if you or others are [injured/in danger/trapped/buried/have an emergency]</li> <li>• FOLLOW instructions from [source]</li> <li>• FOLLOW evacuation orders [info]</li> <li>• LEAVE areas near [location]</li> <li>• STAY away from [location] until further notice</li> <li>• DO NOT enter [location]</li> <li>• DO NOT walk or drive through moving water or on flooded roadways</li> <li>• DO NOT return to area after evacuation [until/unless] [authorized/directed] by local officials</li> <li>• IF DRIVING, do not drive around a barricade or on closed roads</li> </ul> |
|--|--------------------------------------------------------------------------------------------------------------------------------------------------------------------------------------------------------------------------------------------------------------------------------------------------------------------------------------------------------------------------------------------------------------------------------------------------------------------------------------------------------------------------------------------------------------------------------------------------------------------------------------------------------------------------------------------------------------------------------------------------------------------------------------------------------------------------------------------------------------------------------------------------------------------------------------------------------------------|--------------------------------------------------------------------------------------------------------------------------------------------------------------------------------------------------------------------------------------------------------------------------------------------------------------------------------------------------------------------------------------------------------------------------------------------------------------------------------------------------------------------------------------------------------------------------------------------------------------------------------------------------------------------------------------------------------------------|

|                                                                              |                                                                                                      |                                                                                                      |
|------------------------------------------------------------------------------|------------------------------------------------------------------------------------------------------|------------------------------------------------------------------------------------------------------|
| 7. TIME: When should people take protective action? Will the message expire? | NOW; before ## (AM/PM); until ## (AM/PM)                                                             | NOW; before ## (AM/PM); until ## (AM/PM)                                                             |
| 8. ADDITIONAL GUIDANCE: Where should people go for updates?                  | <ul style="list-style-type: none"> <li>CHECK [source] for [updates/information] at [info]</li> </ul> | <ul style="list-style-type: none"> <li>CHECK [source] for [updates/information] at [info]</li> </ul> |

### Pre-event Message Template

- [Source] [MUDFLOW/DEBRIS FLOW] risk in [location] has increased due to recent [weather/earthquake]. [Mudflow/debris flow] can occur quickly, causing injury or death, destruction to roads, bridges, and property in affected areas. BE READY to [evacuate/leave] [location] when advised by local officials. STAY alert and awake.

### During/Post Event Message Template

- [Source] [MUDFLOW/DEBRIS FLOW] has occurred in [area] at ## (AM/PM). Additional [mudflow/debris flow] is possible and can occur quickly, causing injury or death, destruction to roads, bridges, and property in affected areas. IF IN A LOW-LYING AREA, move to higher ground NOW. CALL or text [phone number] if you or others are [injured/in danger/trapped/buried/have an emergency].

**ROCK FALL**

| MESSAGE WRITING STEPS                                                                                                                  | PRE-EVENT CONTENT                                                                                                                                                               | DURING OR POST-EVENT CONTENT                                                                                                                                                  |
|----------------------------------------------------------------------------------------------------------------------------------------|---------------------------------------------------------------------------------------------------------------------------------------------------------------------------------|-------------------------------------------------------------------------------------------------------------------------------------------------------------------------------|
| 1. SOURCE: Which agency should be listed as the source of this message?                                                                | <i>Select a source that is familiar and trusted. Do not use an acronym for the source.</i>                                                                                      | <i>Select a source that is familiar and trusted. Do not use an acronym for the source.</i>                                                                                    |
| 2. HAZARD: What type of hazardous event is happening or about to happen?                                                               | ROCK FALL                                                                                                                                                                       | ROCK FALL                                                                                                                                                                     |
| 3. HAZARD IMPACTS: What are the consequences of this threat that the public should be aware of or how will it affect them personally?  | Significant ROCK FALL risk in [location]. Rock fall can occur quickly, causing injury or death, destruction to roads, bridges, and property.                                    | Significant ROCK FALL has occurred in [location]. Rock fall can occur quickly, causing injury or death, destruction to roads, bridges, and property.                          |
| 4. HAZARD LOCATION: Where is the hazardous event occurring? If the hazard is moving, in what direction is it moving or likely to move? | <i>Select well-known landmarks; town/city/county (all or portion); major road(s)/intersection(s).</i>                                                                           | <i>Select well-known landmarks; town/city/county (all or portion); major road(s)/intersection(s).</i>                                                                         |
| 5. RESPONSE LOCATION: Is there a specific location that should be evacuated or avoided by people? If so, where should they go?         | <i>Select well-known landmarks; town/city/county (all or portion); major road(s)/intersection(s).</i>                                                                           | <i>Select well-known landmarks; town/city/county (all or portion); major road(s)/intersection(s).</i>                                                                         |
| 6. PROTECTIVE ACTION GUIDANCE: What are the specific actions people receiving the message should take?                                 | <ul style="list-style-type: none"> <li>• AVOID area around [location] until further notice</li> <li>• LEAVE areas near [location]</li> <li>• DO NOT enter [location]</li> </ul> | <ul style="list-style-type: none"> <li>• AVOID area around [location] until further notice</li> <li>• CALL or text [phone number] if you or others are [injured/in</li> </ul> |

|                                                                              |                                                                                                                    |                                                                                                                                                                                                                                                                                               |
|------------------------------------------------------------------------------|--------------------------------------------------------------------------------------------------------------------|-----------------------------------------------------------------------------------------------------------------------------------------------------------------------------------------------------------------------------------------------------------------------------------------------|
|                                                                              | <ul style="list-style-type: none"> <li>STAY away from [<i>location</i>] until further notice</li> </ul>            | <p>danger/trapped/buried/have an emergency]</p> <ul style="list-style-type: none"> <li>DO NOT enter [<i>location</i>]</li> <li>FOLLOW instructions from [<i>source</i>]</li> <li>LEAVE areas near [<i>location</i>]</li> <li>STAY away from [<i>location</i>] until further notice</li> </ul> |
| 7. TIME: When should people take protective action? Will the message expire? | NOW; before ## (AM/PM); until ## (AM/PM)                                                                           | NOW; before ## (AM/PM); until ## (AM/PM)                                                                                                                                                                                                                                                      |
| 8. ADDITIONAL GUIDANCE:<br>Where should people go for updates?               | <ul style="list-style-type: none"> <li>CHECK [<i>source</i>] for [updates/information] at [<i>info</i>]</li> </ul> | <ul style="list-style-type: none"> <li>CHECK [<i>source</i>] for [updates/information] at [<i>info</i>]</li> </ul>                                                                                                                                                                            |

### Pre-event Message Template

- [*Source*] Significant ROCK FALL risk in [*location*]. Rock fall can occur quickly, causing injury or death, destruction to roads, bridges, and property. AVOID area around [*location*] until further notice. CHECK [*source*] for [updates/information] at [*info*].

### During/Post Event Message Template

- [*Source*] Significant ROCK FALL has occurred in [*location*] at ## (AM/PM). Rock fall can occur quickly, causing injury or death, destruction to roads, bridges, and property. STAY away from [*location*] until further notice. FOLLOW instructions from [*source*].

**SINK HOLE**

| MESSAGE WRITING STEPS                                                                                                                  | PRE-EVENT CONTENT                                                                                     | DURING OR POST-EVENT CONTENT                                                                                                                                                  |
|----------------------------------------------------------------------------------------------------------------------------------------|-------------------------------------------------------------------------------------------------------|-------------------------------------------------------------------------------------------------------------------------------------------------------------------------------|
| 1. SOURCE: Which agency should be listed as the source of this message?                                                                | <i>Select a source that is familiar and trusted. Do not use an acronym for the source.</i>            | <i>Select a source that is familiar and trusted. Do not use an acronym for the source.</i>                                                                                    |
| 2. HAZARD: What type of hazardous event is happening or about to happen?                                                               | SINK HOLE                                                                                             | SINK HOLE                                                                                                                                                                     |
| 3. HAZARD IMPACTS: What are the consequences of this threat that the public should be aware of or how will it affect them personally?  | N/A                                                                                                   | A large SINK HOLE has opened in [location]. There [may/will] be risks for additional sink holes, which can cause injury or death, and destroy roads, bridges, and property.   |
| 4. HAZARD LOCATION: Where is the hazardous event occurring? If the hazard is moving, in what direction is it moving or likely to move? | <i>Select well-known landmarks; town/city/county (all or portion); major road(s)/intersection(s).</i> | <i>Select well-known landmarks; town/city/county (all or portion); major road(s)/intersection(s).</i>                                                                         |
| 5. RESPONSE LOCATION: Is there a specific location that should be evacuated or avoided by people? If so, where should they go?         | <i>Select well-known landmarks; town/city/county (all or portion); major road(s)/intersection(s).</i> | <i>Select well-known landmarks; town/city/county (all or portion); major road(s)/intersection(s).</i>                                                                         |
| 6. PROTECTIVE ACTION GUIDANCE: What are the specific actions people receiving the message should take?                                 | N/A                                                                                                   | <ul style="list-style-type: none"> <li>• AVOID area around [location] until further notice</li> <li>• CALL or text [phone number] if you or others are [injured/in</li> </ul> |

|                                                                              |                                          |                                                                                                                                                                                                                                                                                                       |
|------------------------------------------------------------------------------|------------------------------------------|-------------------------------------------------------------------------------------------------------------------------------------------------------------------------------------------------------------------------------------------------------------------------------------------------------|
|                                                                              |                                          | <p>danger/trapped/buried/have an emergency]</p> <ul style="list-style-type: none"> <li>• DO NOT enter [<i>location</i>]</li> <li>• FOLLOW instructions from [<i>source</i>]</li> <li>• LEAVE areas near [<i>location</i>]</li> <li>• STAY away from [<i>location</i>] until further notice</li> </ul> |
| 7. TIME: When should people take protective action? Will the message expire? | NOW; before ## (AM/PM); until ## (AM/PM) | NOW; before ## (AM/PM); until ## (AM/PM)                                                                                                                                                                                                                                                              |
| 8. ADDITIONAL GUIDANCE: Where should people go for updates?                  | N/A                                      | <ul style="list-style-type: none"> <li>• CHECK [<i>source</i>] for [updates/information] at [<i>info</i>]</li> </ul>                                                                                                                                                                                  |

### Pre-event Message Template

- None

### During/Post Event Message Template

- [*Source*] A large SINK HOLE has opened in [*location*] at ## (AM/PM). There [may/will] be risks for additional sink holes, which can cause injury or death, and destroy roads, bridges, and property. STAY AWAY from [*location*] until further notice. CHECK [*source*] for [updates/information] at [*info*].

**VOLCANO**

| MESSAGE WRITING STEPS                                                                                                                  | PRE-EVENT CONTENT                                                                                                                                                                        | DURING OR POST-EVENT CONTENT                                                                                                                                                                        |
|----------------------------------------------------------------------------------------------------------------------------------------|------------------------------------------------------------------------------------------------------------------------------------------------------------------------------------------|-----------------------------------------------------------------------------------------------------------------------------------------------------------------------------------------------------|
| 1. SOURCE: Which agency should be listed as the source of this message?                                                                | <i>Select a source that is familiar and trusted. Do not use an acronym for the source.</i>                                                                                               | <i>Select a source that is familiar and trusted. Do not use an acronym for the source.</i>                                                                                                          |
| 2. HAZARD: What type of hazardous event is happening or about to happen?                                                               | VOLCANO                                                                                                                                                                                  | VOLCANO                                                                                                                                                                                             |
| 3. HAZARD IMPACTS: What are the consequences of this threat that the public should be aware of or how will it affect them personally?  | VOLCANIC ACTIVITY is occurring in [location], which could mean an eruption could happen soon. Volcanic debris, lava, and gas can move at high speeds and lead to severe injury or death. | A VOLCANIC ERUPTION has occurred in [location], releasing lava, ash, and poisonous gases. Volcanic debris, lava, and gas can move at high speeds and lead to death. Additional eruptions may occur. |
| 4. HAZARD LOCATION: Where is the hazardous event occurring? If the hazard is moving, in what direction is it moving or likely to move? | <i>Select well-known landmarks; town/city/county (all or portion); major road(s)/intersection(s).</i>                                                                                    | <i>Select well-known landmarks; town/city/county (all or portion); major road(s)/intersection(s).</i>                                                                                               |
| 5. RESPONSE LOCATION: Is there a specific location that should be evacuated or avoided by people? If so, where should they go?         | <i>Select well-known landmarks; town/city/county (all or portion); major road(s)/intersection(s).</i>                                                                                    | <i>Select well-known landmarks; town/city/county (all or portion); major road(s)/intersection(s).</i>                                                                                               |
| 6. PROTECTIVE ACTION GUIDANCE: What are the specific                                                                                   | <ul style="list-style-type: none"> <li>• AVOID area around [location] until further notice</li> </ul>                                                                                    | <ul style="list-style-type: none"> <li>• AVOID area around [location] until further notice</li> <li>• AVOID areas downstream of eruption</li> </ul>                                                 |

|                                                          |                                                                                                                                                                                                                                                                                                                                                                                                                                                                                                                                                                                                                                                                                                                                                                                                                                                                                                                                                                                                                                                                 |                                                                                                                                                                                                                                                                                                                                                                                                                                                                                                                                                                                                                                                       |
|----------------------------------------------------------|-----------------------------------------------------------------------------------------------------------------------------------------------------------------------------------------------------------------------------------------------------------------------------------------------------------------------------------------------------------------------------------------------------------------------------------------------------------------------------------------------------------------------------------------------------------------------------------------------------------------------------------------------------------------------------------------------------------------------------------------------------------------------------------------------------------------------------------------------------------------------------------------------------------------------------------------------------------------------------------------------------------------------------------------------------------------|-------------------------------------------------------------------------------------------------------------------------------------------------------------------------------------------------------------------------------------------------------------------------------------------------------------------------------------------------------------------------------------------------------------------------------------------------------------------------------------------------------------------------------------------------------------------------------------------------------------------------------------------------------|
| <p>actions people receiving the message should take?</p> | <ul style="list-style-type: none"> <li>• BE READY to [evacuate/leave] [location] when advised by local officials</li> <li>• CLOSE air conditioner fresh-air intake</li> <li>• CLOSE doors and windows</li> <li>• CLOSE fireplace dampers</li> <li>• COVER your nose and mouth with a cloth/mask to protect breathing from [smoke, particles, ash, fumes, etc.] while [evacuating/sheltering/outside/near area]</li> <li>• DO NOT drive in heavy ash fall</li> <li>• DO NOT return to area after evacuation [until/unless] [authorized/directed] by local officials</li> <li>• DO NOT enter [location]</li> <li>• FOLLOW designated evacuation routes [info]</li> <li>• FOLLOW evacuation orders [info]</li> <li>• FOLLOW instructions from [source]</li> <li>• IF DRIVING to evacuate area, keep car windows and vents closed</li> <li>• IF you cannot evacuate, stay indoors until further notice</li> <li>• LEAVE areas near [location]</li> <li>• PREPARE by getting your essential documents, including: [birth certificate, passports, driver's</li> </ul> | <ul style="list-style-type: none"> <li>• COVER your nose and mouth with a cloth/mask to protect breathing from [smoke, particles, ash, fumes, etc.] while [evacuating/sheltering/outside/near area]</li> <li>• DO NOT enter [location]</li> <li>• DO NOT drive in heavy ash fall</li> <li>• DO NOT return to area after evacuation [until/unless] [authorized/directed] by local officials</li> <li>• LEAVE areas near [location]</li> <li>• IF DRIVING to evacuate area, keep car windows and vents closed</li> <li>• IF you cannot evacuate, stay indoors until further notice</li> <li>• STAY away from [location] until further notice</li> </ul> |
|----------------------------------------------------------|-----------------------------------------------------------------------------------------------------------------------------------------------------------------------------------------------------------------------------------------------------------------------------------------------------------------------------------------------------------------------------------------------------------------------------------------------------------------------------------------------------------------------------------------------------------------------------------------------------------------------------------------------------------------------------------------------------------------------------------------------------------------------------------------------------------------------------------------------------------------------------------------------------------------------------------------------------------------------------------------------------------------------------------------------------------------|-------------------------------------------------------------------------------------------------------------------------------------------------------------------------------------------------------------------------------------------------------------------------------------------------------------------------------------------------------------------------------------------------------------------------------------------------------------------------------------------------------------------------------------------------------------------------------------------------------------------------------------------------------|



|                                                                              |                                                                                                                                                                                                                                                                                                                                                                                                                                                                                                                                              |                                                                                                        |
|------------------------------------------------------------------------------|----------------------------------------------------------------------------------------------------------------------------------------------------------------------------------------------------------------------------------------------------------------------------------------------------------------------------------------------------------------------------------------------------------------------------------------------------------------------------------------------------------------------------------------------|--------------------------------------------------------------------------------------------------------|
|                                                                              | <p>license, social security card, insurance cards, etc.] and [taking/keeping] them with you</p> <ul style="list-style-type: none"> <li>• PREPARE now by getting essential supplies for you and those in your care, including pets and babies: [food, water, cash, medication, gas, glasses/contacts, hearing aids, pet supplies, pet carriers, baby supplies, etc.] and [take/keep] them with you</li> <li>• TURN OFF all fans and heating and air conditioning systems</li> <li>• STAY away from [location] until further notice</li> </ul> |                                                                                                        |
| 7. TIME: When should people take protective action? Will the message expire? | NOW; before ## (AM/PM); until ## (AM/PM)                                                                                                                                                                                                                                                                                                                                                                                                                                                                                                     | NOW; before ## (AM/PM); until ## (AM/PM)                                                               |
| 8. ADDITIONAL GUIDANCE: Where should people go for updates?                  | <ul style="list-style-type: none"> <li>• CHECK [source] for [updates/information] at [info]</li> </ul>                                                                                                                                                                                                                                                                                                                                                                                                                                       | <ul style="list-style-type: none"> <li>• CHECK [source] for [updates/information] at [info]</li> </ul> |

### Pre-event Message Template

- [Source] VOLCANIC ACTIVITY is occurring in [location], which could mean an eruption could happen soon. Volcanic debris, lava, and gas can move at high speeds and lead to severe injury or death. LEAVE areas near [location] NOW. FOLLOW designated evacuation routes [info]. DO NOT return to area after evacuation [until/unless] [authorized/directed] by local officials.

### During/Post Event Message Template

- [Source] A VOLCANIC ERUPTION has occurred in [location] at ## (AM/PM), releasing lava, ash, and poisonous gases. Volcanic debris, lava, and gas can move at high speeds and lead to death. Additional eruptions may occur. LEAVE areas near [location] NOW. COVER your nose and mouth with a cloth/mask to protect breathing from [smoke, particles, ash, fumes, etc.]

while [evacuating/sheltering/outside/near area]. IF you cannot evacuate, stay indoors until further notice. CHECK [*source*] for [updates/information] at [*info*].

## ATMOSPHERIC HAZARDS

### BLIZZARD

| MESSAGE WRITING STEPS                                                                                                                  | PRE-EVENT CONTENT                                                                                                                                                                                                     | DURING OR POST-EVENT CONTENT                                                                                                                                                                                          |
|----------------------------------------------------------------------------------------------------------------------------------------|-----------------------------------------------------------------------------------------------------------------------------------------------------------------------------------------------------------------------|-----------------------------------------------------------------------------------------------------------------------------------------------------------------------------------------------------------------------|
| 1. SOURCE: Which agency should be listed as the source of this message?                                                                | <i>Select a source that is familiar and trusted. Do not use an acronym for the source.</i>                                                                                                                            | <i>Select a source that is familiar and trusted. Do not use an acronym for the source.</i>                                                                                                                            |
| 2. HAZARD: What type of hazardous event is happening or about to happen?                                                               | BLIZZARD                                                                                                                                                                                                              | BLIZZARD                                                                                                                                                                                                              |
| 3. HAZARD IMPACTS: What are the consequences of this threat that the public should be aware of or how will it affect them personally?  | BLIZZARD conditions in [location] [may/will] bring blowing snow and high winds, resulting in extremely limited visibility and unsafe road conditions for travelers and drivers. Potential for power outages to occur. | BLIZZARD conditions in [location] [may/will] bring blowing snow and high winds, resulting in extremely limited visibility and unsafe road conditions for travelers and drivers. Potential for power outages to occur. |
| 4. HAZARD LOCATION: Where is the hazardous event occurring? If the hazard is moving, in what direction is it moving or likely to move? | <i>Select well-known landmarks; town/city/county (all or portion); major road(s)/intersection(s).</i>                                                                                                                 | <i>Select well-known landmarks; town/city/county (all or portion); major road(s)/intersection(s).</i>                                                                                                                 |
| 5. RESPONSE LOCATION: Is there a specific location that should be evacuated or avoided by people? If so, where should they go?         | <i>Select well-known landmarks; town/city/county (all or portion); major road(s)/intersection(s).</i>                                                                                                                 | <i>Select well-known landmarks; town/city/county (all or portion); major road(s)/intersection(s).</i>                                                                                                                 |

|                                                                                                                   |                                                                                                                                                                                                                                                                                                                                      |                                                                                                                                                                                                                                                                                                                                                                                                                                                                                       |
|-------------------------------------------------------------------------------------------------------------------|--------------------------------------------------------------------------------------------------------------------------------------------------------------------------------------------------------------------------------------------------------------------------------------------------------------------------------------|---------------------------------------------------------------------------------------------------------------------------------------------------------------------------------------------------------------------------------------------------------------------------------------------------------------------------------------------------------------------------------------------------------------------------------------------------------------------------------------|
| <p>6. PROTECTIVE ACTION<br/>GUIDANCE: What are the specific actions people receiving the message should take?</p> | <ul style="list-style-type: none"> <li>• PREPARE by having non-perishable food and water on hand by [time]</li> <li>• PREPARE for power outages by fully charging your cell phone and backup batteries/external power packs</li> <li>• PREPARE for power outages by testing batteries in radios and flashlights by [time]</li> </ul> | <ul style="list-style-type: none"> <li>• AVOID travel [until further notice/until [time]]</li> <li>• IF DRIVING, and you become stranded, hang a distress flag from the antenna or window and stay in your vehicle. Use seat covers and floor mats for insulation or huddle with other passengers</li> <li>• IF DRIVING, leave extra space between cars</li> <li>• IF DRIVING, make sure headlights are on. [Do/do not] use high beams</li> <li>• IF DRIVING, reduce speed</li> </ul> |
| <p>7. TIME: When should people take protective action? Will the message expire?</p>                               | <p>NOW; before ## (AM/PM); until ## (AM/PM);</p>                                                                                                                                                                                                                                                                                     | <p>NOW; before ## (AM/PM); until ## (AM/PM)</p>                                                                                                                                                                                                                                                                                                                                                                                                                                       |
| <p>8. ADDITIONAL GUIDANCE:<br/>Where should people go for updates?</p>                                            | <ul style="list-style-type: none"> <li>• CHECK [source] for [updates/information] at [info]</li> </ul>                                                                                                                                                                                                                               | <ul style="list-style-type: none"> <li>• CHECK [source] for [updates/information] at [info]</li> </ul>                                                                                                                                                                                                                                                                                                                                                                                |

### Pre-event Message Template

- [Source] BLIZZARD conditions in [location] [may/will] bring blowing snow and high winds, resulting in extremely limited visibility and unsafe road conditions for travelers and drivers beginning at ## (AM/PM). Potential for power outages to occur. PREPARE for power outages by fully charging your cell phone and backup batteries/external power packs. CHECK [source] for [updates/information] at [info].

### During/Post Event Message Template

- [Source] BLIZZARD conditions in [location] [may/will] bring blowing snow and high winds, resulting in extremely limited visibility and unsafe road conditions for travelers and drivers until ## (AM/PM). Potential for power outages to occur. AVOID travel [until further notice/until [time]]. IF DRIVING, reduce speed and leave extra space between cars. CHECK [source] for [updates/information] at [info].

**DUST STORM**

| MESSAGE WRITING STEPS                                                                                                                  | PRE-EVENT CONTENT                                                                                                                                                                                 | DURING OR POST-EVENT CONTENT                                                                                                                                                                      |
|----------------------------------------------------------------------------------------------------------------------------------------|---------------------------------------------------------------------------------------------------------------------------------------------------------------------------------------------------|---------------------------------------------------------------------------------------------------------------------------------------------------------------------------------------------------|
| 1. SOURCE: Which agency should be listed as the source of this message?                                                                | <i>Select a source that is familiar and trusted. Do not use an acronym for the source.</i>                                                                                                        | <i>Select a source that is familiar and trusted. Do not use an acronym for the source.</i>                                                                                                        |
| 2. HAZARD: What type of hazardous event is happening or about to happen?                                                               | DUST STORM                                                                                                                                                                                        | DUST STORM                                                                                                                                                                                        |
| 3. HAZARD IMPACTS: What are the consequences of this threat that the public should be aware of or how will it affect them personally?  | DUST STORM warning in [ <i>location</i> ]. Travel conditions [may/will] become unsafe. Sudden reduced visibility and vehicle collisions are [possible/likely].                                    | A DUST STORM is occurring/has occurred in [ <i>location</i> ], and [could result/has resulted] in vehicle collisions and road closures.                                                           |
| 4. HAZARD LOCATION: Where is the hazardous event occurring? If the hazard is moving, in what direction is it moving or likely to move? | <i>Select well-known landmarks; town/city/county (all or portion); major road(s)/intersection(s).</i>                                                                                             | <i>Select well-known landmarks; town/city/county (all or portion); major road(s)/intersection(s).</i>                                                                                             |
| 5. RESPONSE LOCATION: Is there a specific location that should be evacuated or avoided by people? If so, where should they go?         | <i>Select well-known landmarks; town/city/county (all or portion); major road(s)/intersection(s).</i>                                                                                             | <i>Select well-known landmarks; town/city/county (all or portion); major road(s)/intersection(s).</i>                                                                                             |
| 6. PROTECTIVE ACTION GUIDANCE: What are the specific actions people receiving the message should take?                                 | <ul style="list-style-type: none"> <li>• DELAY road travel [due to reduced visibility, due to slick roads, to avoid damage to vehicle, etc.]</li> <li>• DO NOT enter [<i>location</i>]</li> </ul> | <ul style="list-style-type: none"> <li>• DELAY road travel [due to reduced visibility, due to slick roads, to avoid damage to vehicle, etc.]</li> <li>• DO NOT enter [<i>location</i>]</li> </ul> |

|                                                                              |                                                                                                                                                                                                                                                                                                                                                                                                                                          |                                                                                                                                                                                                                                                                                                                                                                                                                                          |
|------------------------------------------------------------------------------|------------------------------------------------------------------------------------------------------------------------------------------------------------------------------------------------------------------------------------------------------------------------------------------------------------------------------------------------------------------------------------------------------------------------------------------|------------------------------------------------------------------------------------------------------------------------------------------------------------------------------------------------------------------------------------------------------------------------------------------------------------------------------------------------------------------------------------------------------------------------------------------|
|                                                                              | <ul style="list-style-type: none"> <li>• IF DRIVING, safely pull off the road, put your vehicle in park, and turn off your car engine and lights. Take your foot off the brake.</li> <li>• IF OUTSIDE [OR DRIVING], go inside the nearest building and into a small interior room</li> <li>• IF you can't pull off the road safely, slow down, turn on lights, sound horn, and try to stay in your lane. Do not stop on road.</li> </ul> | <ul style="list-style-type: none"> <li>• IF DRIVING, safely pull off the road, put your vehicle in park, and turn off your car engine and lights. Take your foot off the brake.</li> <li>• IF OUTSIDE [OR DRIVING], go inside the nearest building and into a small interior room</li> <li>• IF you can't pull off the road safely, slow down, turn on lights, sound horn, and try to stay in your lane. Do not stop on road.</li> </ul> |
| 7. TIME: When should people take protective action? Will the message expire? | NOW; before ## (AM/PM); until ## (AM/PM)                                                                                                                                                                                                                                                                                                                                                                                                 | NOW; before ## (AM/PM); until ## (AM/PM)                                                                                                                                                                                                                                                                                                                                                                                                 |
| 8. ADDITIONAL GUIDANCE: Where should people go for updates?                  | <ul style="list-style-type: none"> <li>• CHECK [source] for [updates/information] at [info]</li> </ul>                                                                                                                                                                                                                                                                                                                                   | <ul style="list-style-type: none"> <li>• CHECK [source] for [updates/information] at [info]</li> </ul>                                                                                                                                                                                                                                                                                                                                   |

### Pre-event Message Template

- [Source] DUST STORM warning in [location]. Travel conditions [may/will] become unsafe. Sudden reduced visibility and vehicle collisions are [possible/likely]. DELAY road travel [due to reduced visibility, due to slick roads, to avoid damage to vehicle, etc.] until ## (AM/PM). CHECK [source] for [updates/information] at [info].

### During/Post Event Message Template

- [Source] A DUST STORM is occurring/has occurred in [location] at ## (AM/PM), and [could result/has resulted] in vehicle collisions and road closures. IF DRIVING, safely pull off the road, put your vehicle in park, and turn off your car engine and lights. Take your foot off the brake. IF [OUTSIDE/DRIVING], go inside the nearest building and into a small interior room. CHECK [source] for [updates/information] at [info].

**NOTE: Wireless Emergency Alerts for Dust Storm are issued by the National Weather Service. Information provided here should not supplant the guidance provided by your local Weather Forecast Office.**

**EXTREME COLD**

| MESSAGE WRITING STEPS                                                                                                                  | PRE-EVENT CONTENT                                                                                                                                                                               | DURING OR POST-EVENT CONTENT                                                                                                                                                             |
|----------------------------------------------------------------------------------------------------------------------------------------|-------------------------------------------------------------------------------------------------------------------------------------------------------------------------------------------------|------------------------------------------------------------------------------------------------------------------------------------------------------------------------------------------|
| 1. SOURCE: Which agency should be listed as the source of this message?                                                                | <i>Select a source that is familiar and trusted. Do not use an acronym for the source.</i>                                                                                                      | <i>Select a source that is familiar and trusted. Do not use an acronym for the source.</i>                                                                                               |
| 2. HAZARD: What type of hazardous event is happening or about to happen?                                                               | EXTREME COLD                                                                                                                                                                                    | EXTREME COLD                                                                                                                                                                             |
| 3. HAZARD IMPACTS: What are the consequences of this threat that the public should be aware of or how will it affect them personally?  | EXTREME COLD conditions in [location] will occur at [time]. Extended exposure to cold can cause dangerously low body temperature and damage to exposed skin, which can become life threatening. | EXTREME COLD conditions are occurring in [location]. Extended exposure to cold can cause dangerously low body temperature and damage to exposed skin, which can become life threatening. |
| 4. HAZARD LOCATION: Where is the hazardous event occurring? If the hazard is moving, in what direction is it moving or likely to move? | <i>Select well-known landmarks; town/city/county (all or portion); major road(s)/intersection(s).</i>                                                                                           | <i>Select well-known landmarks; town/city/county (all or portion); major road(s)/intersection(s).</i>                                                                                    |
| 5. RESPONSE LOCATION: Is there a specific location that should be evacuated or avoided by people? If so, where should they go?         | <i>Select well-known landmarks; town/city/county (all or portion); major road(s)/intersection(s).</i>                                                                                           | <i>Select well-known landmarks; town/city/county (all or portion); major road(s)/intersection(s).</i>                                                                                    |



|                                                                                                                   |                                                                                                                                                                                                                                                                                                                                                                                                                                                                                                                                                                                                                                              |                                                                                                                                                                                                                                                                                                                                                                                                                                                                                                                                                                                                                                              |
|-------------------------------------------------------------------------------------------------------------------|----------------------------------------------------------------------------------------------------------------------------------------------------------------------------------------------------------------------------------------------------------------------------------------------------------------------------------------------------------------------------------------------------------------------------------------------------------------------------------------------------------------------------------------------------------------------------------------------------------------------------------------------|----------------------------------------------------------------------------------------------------------------------------------------------------------------------------------------------------------------------------------------------------------------------------------------------------------------------------------------------------------------------------------------------------------------------------------------------------------------------------------------------------------------------------------------------------------------------------------------------------------------------------------------------|
| <p>6. PROTECTIVE ACTION<br/>GUIDANCE: What are the specific actions people receiving the message should take?</p> | <ul style="list-style-type: none"> <li>• AVOID [outdoor activities/being outdoors] during the [hottest/coldest] part of the day</li> <li>• [AVOID/REDUCE/RESCHEDULE] [all/prolonged] outdoor physical activity during the [hottest/coldest] part of the day</li> <li>• BRING pets and other animals indoors</li> <li>• CHECK on [elderly, family members, neighbors] and make sure their homes are [heated/cooled] properly [<i>info</i>]</li> <li>• DO NOT leave pets and other animals outdoors</li> <li>• IF OUTSIDE, wear several layers of warm clothing</li> <li>• LIMIT time outside to no more than [<i>etc.</i>] minutes</li> </ul> | <ul style="list-style-type: none"> <li>• AVOID [outdoor activities/being outdoors] during the [hottest/coldest] part of the day</li> <li>• [AVOID/REDUCE/RESCHEDULE] [all/prolonged] outdoor physical activity during the [hottest/coldest] part of the day</li> <li>• BRING pets and other animals indoors</li> <li>• CHECK on [elderly, family members, neighbors] and make sure their homes are [heated/cooled] properly [<i>info</i>]</li> <li>• DO NOT leave pets and other animals outdoors</li> <li>• IF OUTSIDE, wear several layers of warm clothing</li> <li>• LIMIT time outside to no more than [<i>etc.</i>] minutes</li> </ul> |
| <p>7. TIME: When should people take protective action? Will the message expire?</p>                               | <p>NOW; before ## (AM/PM); until ## (AM/PM)</p>                                                                                                                                                                                                                                                                                                                                                                                                                                                                                                                                                                                              | <p>NOW; before ## (AM/PM); until ## (AM/PM)</p>                                                                                                                                                                                                                                                                                                                                                                                                                                                                                                                                                                                              |
| <p>8. ADDITIONAL GUIDANCE:<br/>Where should people go for updates?</p>                                            | <ul style="list-style-type: none"> <li>• CHECK [<i>source</i>] for [updates/information] at [<i>info</i>]</li> </ul>                                                                                                                                                                                                                                                                                                                                                                                                                                                                                                                         | <ul style="list-style-type: none"> <li>• CHECK [<i>source</i>] for [updates/information] at [<i>info</i>]</li> </ul>                                                                                                                                                                                                                                                                                                                                                                                                                                                                                                                         |

### Pre-event Message Template

- [*Source*] EXTREME COLD conditions in [*location*] will occur at [*time*]. Extended exposure to cold can cause dangerously low body temperature and damage to exposed skin, which can become life threatening. CHECK on [elderly, family members, neighbors] and make sure their homes are [heated/cooled] properly [*info*]. LIMIT time outside to no more than [*etc.*] minutes.

**During/Post Event Message Template**

- [Source] EXTREME COLD conditions are occurring in [location] until ## (AM/PM). Extended exposure to cold can cause dangerously low body temperature and damage to exposed skin, which can become life threatening. DO NOT leave pets and other animals outdoors. IF OUTSIDE, wear several layers of warm clothing. LIMIT time outside to no more than [etc.] minutes.

**EXTREME HEAT**

| MESSAGE WRITING STEPS                                                                                                                  | PRE-EVENT CONTENT                                                                                                                                                                 | DURING OR POST-EVENT CONTENT                                                                                                                                                   |
|----------------------------------------------------------------------------------------------------------------------------------------|-----------------------------------------------------------------------------------------------------------------------------------------------------------------------------------|--------------------------------------------------------------------------------------------------------------------------------------------------------------------------------|
| 1. SOURCE: Which agency should be listed as the source of this message?                                                                | <i>Select a source that is familiar and trusted. Do not use an acronym for the source.</i>                                                                                        | <i>Select a source that is familiar and trusted. Do not use an acronym for the source.</i>                                                                                     |
| 2. HAZARD: What type of hazardous event is happening or about to happen?                                                               | EXTREME HEAT                                                                                                                                                                      | EXTREME HEAT                                                                                                                                                                   |
| 3. HAZARD IMPACTS: What are the consequences of this threat that the public should be aware of or how will it affect them personally?  | EXTREME HEAT in [location] starting at [time]. Extremely dangerous heat conditions will occur, possibly leading to heat related illness, such as heat exhaustion and heat stroke. | EXTREME HEAT in [location] until [time]. Extremely dangerous heat conditions are occurring, possibly leading to heat related illness, such as heat exhaustion and heat stroke. |
| 4. HAZARD LOCATION: Where is the hazardous event occurring? If the hazard is moving, in what direction is it moving or likely to move? | <i>Select well-known landmarks; town/city/county (all or portion); major road(s)/intersection(s).</i>                                                                             | <i>Select well-known landmarks; town/city/county (all or portion); major road(s)/intersection(s).</i>                                                                          |
| 5. RESPONSE LOCATION: Is there a specific location that should be evacuated or avoided by people? If so, where should they go?         | <i>Select well-known landmarks; town/city/county (all or portion); major road(s)/intersection(s).</i>                                                                             | <i>Select well-known landmarks; town/city/county (all or portion); major road(s)/intersection(s).</i>                                                                          |
| 6. PROTECTIVE ACTION GUIDANCE: What are the specific actions people receiving the message should take?                                 | <ul style="list-style-type: none"> <li>[AVOID/REDUCE/RESCHEDULE] [all/prolonged] outdoor physical activity during the [hottest/coldest] part of the day</li> </ul>                | <ul style="list-style-type: none"> <li>[AVOID/REDUCE/RESCHEDULE] [all/prolonged] outdoor physical activity during the [hottest/coldest] part of the day</li> </ul>             |

|                                                                              |                                                                                                                                                                                                                                                                                                                                                                                                                                                                                                                                                                                                                                                                                                                                                                                                                                                                                                                                                                               |                                                                                                                                                                                                                                                                                                                                                                                                                                                                                                                                                                                                                                                                                                                                                                                                                                                                                                                                                                               |
|------------------------------------------------------------------------------|-------------------------------------------------------------------------------------------------------------------------------------------------------------------------------------------------------------------------------------------------------------------------------------------------------------------------------------------------------------------------------------------------------------------------------------------------------------------------------------------------------------------------------------------------------------------------------------------------------------------------------------------------------------------------------------------------------------------------------------------------------------------------------------------------------------------------------------------------------------------------------------------------------------------------------------------------------------------------------|-------------------------------------------------------------------------------------------------------------------------------------------------------------------------------------------------------------------------------------------------------------------------------------------------------------------------------------------------------------------------------------------------------------------------------------------------------------------------------------------------------------------------------------------------------------------------------------------------------------------------------------------------------------------------------------------------------------------------------------------------------------------------------------------------------------------------------------------------------------------------------------------------------------------------------------------------------------------------------|
|                                                                              | <ul style="list-style-type: none"> <li>• AVOID [outdoor activities/being outdoors] during the [hottest/coldest] part of the day</li> <li>• AVOID direct sun exposure or make sure you take breaks in the shade</li> <li>• BRING pets and other animals indoors or provide water and shade if outside</li> <li>• CHECK on [elderly, family members, neighbors] and make sure their homes are [heated/cooled] properly [<i>info</i>]</li> <li>• DO NOT leave pets and other animals outdoors</li> <li>• IF OUTSIDE, wear light-colored loose clothing and a hat</li> <li>• IF without [heat/air conditioning], go to a recommended public shelter [or [heated/air conditioned] building] by [time]: [<i>info</i>]</li> <li>• IF without safe shelter, go to a recommended public shelter by [time]: [<i>info</i>]</li> <li>• LIMIT time outside to no more than [<i>etc.</i>] minutes</li> <li>• NEVER leave pets, children, or others who are in your care in a car</li> </ul> | <ul style="list-style-type: none"> <li>• AVOID [outdoor activities/being outdoors] during the [hottest/coldest] part of the day</li> <li>• AVOID direct sun exposure or make sure you take breaks in the shade</li> <li>• BRING pets and other animals indoors or provide water and shade if outside</li> <li>• CHECK on [elderly, family members, neighbors] and make sure their homes are [heated/cooled] properly [<i>info</i>]</li> <li>• DO NOT leave pets and other animals outdoors</li> <li>• IF OUTSIDE, wear light-colored loose clothing and a hat</li> <li>• IF without [heat/air conditioning], go to a recommended public shelter [or [heated/air conditioned] building] by [time]: [<i>info</i>]</li> <li>• IF without safe shelter, go to a recommended public shelter by [time]: [<i>info</i>]</li> <li>• LIMIT time outside to no more than [<i>etc.</i>] minutes</li> <li>• NEVER leave pets, children, or others who are in your care in a car</li> </ul> |
| 7. TIME: When should people take protective action? Will the message expire? | NOW; before ## (AM/PM); until ## (AM/PM)                                                                                                                                                                                                                                                                                                                                                                                                                                                                                                                                                                                                                                                                                                                                                                                                                                                                                                                                      | NOW; before ## (AM/PM); until ## (AM/PM)                                                                                                                                                                                                                                                                                                                                                                                                                                                                                                                                                                                                                                                                                                                                                                                                                                                                                                                                      |

|                                                                |                                                                                                      |                                                    |
|----------------------------------------------------------------|------------------------------------------------------------------------------------------------------|----------------------------------------------------|
| 8. ADDITIONAL GUIDANCE:<br>Where should people go for updates? | <ul style="list-style-type: none"> <li>CHECK [source] for [updates/information] at [info]</li> </ul> | CHECK [source] for [updates/information] at [info] |
|----------------------------------------------------------------|------------------------------------------------------------------------------------------------------|----------------------------------------------------|

### Pre-event Message Template

- [Source] EXTREME HEAT in [location] starting at [time]. Extremely dangerous heat conditions will occur, possibly leading to heat related illness, such as heat exhaustion and heat stroke. [AVOID/REDUCE/RESCHEDULE] [all/prolonged] outdoor physical activity during the [hottest/coldest] part of the day. IF without [heat/air conditioning], go to a recommended public shelter [or [heated/air conditioned] building] by [time]: [info]. NEVER leave pets, children, or others who are in your care in a car. CHECK [source] for [updates/information] at [info]

### During/Post Event Message Template

- [Source] EXTREME HEAT in [location] until [time]. Extremely dangerous heat conditions are occurring, possibly leading to heat related illness, such as heat exhaustion and heat stroke. [AVOID/REDUCE/RESCHEDULE] [all/prolonged] outdoor physical activity during the [hottest/coldest] part of the day. IF without [heat/air conditioning], go to a recommended public shelter [or [heated/air conditioned] building] by [time]: [info]. NEVER leave pets, children, or others who are in your care in a car. CHECK [source] for [updates/information] at [info]

**FLASH FLOOD**

| MESSAGE WRITING STEPS                                                                                                                  | PRE-EVENT CONTENT                                                                                                                                               | DURING OR POST-EVENT CONTENT                                                                                                                                    |
|----------------------------------------------------------------------------------------------------------------------------------------|-----------------------------------------------------------------------------------------------------------------------------------------------------------------|-----------------------------------------------------------------------------------------------------------------------------------------------------------------|
| 1. SOURCE: Which agency should be listed as the source of this message?                                                                | <i>Select a source that is familiar and trusted. Do not use an acronym for the source.</i>                                                                      | <i>Select a source that is familiar and trusted. Do not use an acronym for the source.</i>                                                                      |
| 2. HAZARD: What type of hazardous event is happening or about to happen?                                                               | FLASH FLOOD                                                                                                                                                     | FLASH FLOOD                                                                                                                                                     |
| 3. HAZARD IMPACTS: What are the consequences of this threat that the public should be aware of or how will it affect them personally?  | FLASH FLOOD in [location]. Flood waters can move swiftly and rise rapidly. Driving into flooded areas is extremely dangerous and may result in injury or death. | FLASH FLOOD in [location]. Flood waters can move swiftly and rise rapidly. Driving into flooded areas is extremely dangerous and may result in injury or death. |
| 4. HAZARD LOCATION: Where is the hazardous event occurring? If the hazard is moving, in what direction is it moving or likely to move? | <i>Select well-known landmarks; town/city/county (all or portion); major road(s)/intersection(s).</i>                                                           | <i>Select well-known landmarks; town/city/county (all or portion); major road(s)/intersection(s).</i>                                                           |
| 5. RESPONSE LOCATION: Is there a specific location that should be evacuated or avoided by people? If so, where should they go?         | <i>Select well-known landmarks; town/city/county (all or portion); major road(s)/intersection(s).</i>                                                           | <i>Select well-known landmarks; town/city/county (all or portion); major road(s)/intersection(s).</i>                                                           |
| 6. PROTECTIVE ACTION GUIDANCE: What are the specific actions people receiving the message should take?                                 | <ul style="list-style-type: none"> <li>• BE READY to [evacuate/leave] [location] when advised by local officials</li> </ul>                                     | <ul style="list-style-type: none"> <li>• AVOID rising water</li> <li>• AVOID travel [until further notice/until [time]]</li> </ul>                              |

|                                                                              |                                                                                                                                                                                                                                                                                                                                                                                                                                                                                                                                                                                                                                                                                                                                     |                                                                                                                                                                                                                                                                                                                                                                                                                                                                                                                                                                                                                                                                                                                                                                                                                                                                                                                                                                                                                                      |
|------------------------------------------------------------------------------|-------------------------------------------------------------------------------------------------------------------------------------------------------------------------------------------------------------------------------------------------------------------------------------------------------------------------------------------------------------------------------------------------------------------------------------------------------------------------------------------------------------------------------------------------------------------------------------------------------------------------------------------------------------------------------------------------------------------------------------|--------------------------------------------------------------------------------------------------------------------------------------------------------------------------------------------------------------------------------------------------------------------------------------------------------------------------------------------------------------------------------------------------------------------------------------------------------------------------------------------------------------------------------------------------------------------------------------------------------------------------------------------------------------------------------------------------------------------------------------------------------------------------------------------------------------------------------------------------------------------------------------------------------------------------------------------------------------------------------------------------------------------------------------|
|                                                                              | <ul style="list-style-type: none"> <li>• AVOID travel [until further notice/until [time]]</li> <li>• DELAY road travel [due to reduced visibility, due to slick roads, to avoid damage to vehicle, etc.]</li> <li>• DO NOT travel by car or foot unless evacuating flooded area or under an evacuation order</li> <li>• DO NOT return to area after evacuation [until/unless] [authorized/directed] by local officials</li> <li>• IF you are alone and unable to [evacuate, etc.], contact local authorities at [<i>contact info</i>]</li> <li>• IF IN A LOW-LYING AREA, move to higher ground</li> <li>• LEAVE areas near [<i>location</i>]</li> <li>• SECURE outdoor objects, such as outdoor furniture and trash cans</li> </ul> | <ul style="list-style-type: none"> <li>• DELAY road travel [due to reduced visibility, due to slick roads, to avoid damage to vehicle, etc.]</li> <li>• DO NOT enter [<i>location</i>]</li> <li>• DO NOT travel by car or foot unless evacuating flooded area or under an evacuation order</li> <li>• DO NOT walk or drive through moving water or on flooded roadways</li> <li>• IF DRIVING, and floodwaters rise around your car, seek refuge on the roof or abandon the car for higher ground on foot</li> <li>• IF DRIVING, do not drive around a barricade or on closed roads</li> <li>• IF DRIVING, reduce speed</li> <li>• IF DRIVING, safely pull off the road and stay in your vehicle with your seatbelt on. Wait for an all-clear notice.</li> <li>• IF IN A LOW-LYING AREA, move to higher ground</li> <li>• IF TRAPPED, go to the highest level of your home/building, including the roof. Do not climb into a closed attic. You may be unable to escape.</li> <li>• STAY off bridges over fast moving water</li> </ul> |
| 7. TIME: When should people take protective action? Will the message expire? | NOW; before ## (AM/PM); until ## (AM/PM)                                                                                                                                                                                                                                                                                                                                                                                                                                                                                                                                                                                                                                                                                            | NOW; before ## (AM/PM); until ## (AM/PM)                                                                                                                                                                                                                                                                                                                                                                                                                                                                                                                                                                                                                                                                                                                                                                                                                                                                                                                                                                                             |
| 8. ADDITIONAL GUIDANCE: Where should people go for updates?                  | <ul style="list-style-type: none"> <li>• CHECK [<i>source</i>] for [updates/information] at [<i>info</i>]</li> </ul>                                                                                                                                                                                                                                                                                                                                                                                                                                                                                                                                                                                                                | <ul style="list-style-type: none"> <li>• CHECK [<i>source</i>] for [updates/information] at [<i>info</i>]</li> </ul>                                                                                                                                                                                                                                                                                                                                                                                                                                                                                                                                                                                                                                                                                                                                                                                                                                                                                                                 |

|  |                                                                                            |  |
|--|--------------------------------------------------------------------------------------------|--|
|  | <ul style="list-style-type: none"> <li>• VISIT [URL] for evacuation preparation</li> </ul> |  |
|--|--------------------------------------------------------------------------------------------|--|

### Pre-event Message Template

- [Source] FLASH FLOOD in [location] expected at ## (AM/PM). Flood waters can move swiftly and rise rapidly. Driving into flooded areas is extremely dangerous and may result in injury or death. BE READY to [evacuate/leave] [location] when advised by local officials. IF you are alone and unable to [evacuate, etc.], contact local authorities at [contact info]. VISIT [URL] for evacuation preparation.

### During/Post Event Message Template

- [Source] FLASH FLOOD in [location]. Flood waters can move swiftly and rise rapidly. Driving into flooded areas is extremely dangerous and may result in injury or death. AVOID travel [until further notice/until [time]]. DO NOT travel by car or foot unless evacuating flooded area or under an evacuation order. IF DRIVING, do not drive around a barricade or on closed roads.

**NOTE: Wireless Emergency Alerts for Flash Flood (Warning and Emergency) are issued by the National Weather Service. Information provided here should not supplant the guidance provided by your local Weather Forecast Office.**



**FOG**

| MESSAGE WRITING STEPS                                                                                                                  | PRE-EVENT CONTENT                                                                                                                                                            | DURING OR POST-EVENT CONTENT                                                                                                                                                 |
|----------------------------------------------------------------------------------------------------------------------------------------|------------------------------------------------------------------------------------------------------------------------------------------------------------------------------|------------------------------------------------------------------------------------------------------------------------------------------------------------------------------|
| 1. SOURCE: Which agency should be listed as the source of this message?                                                                | <i>Select a source that is familiar and trusted. Do not use an acronym for the source.</i>                                                                                   | <i>Select a source that is familiar and trusted. Do not use an acronym for the source.</i>                                                                                   |
| 2. HAZARD: What type of hazardous event is happening or about to happen?                                                               | FOG                                                                                                                                                                          | FOG                                                                                                                                                                          |
| 3. HAZARD IMPACTS: What are the consequences of this threat that the public should be aware of or how will it affect them personally?  | Hazardous FOG in [location] [may/will] significantly reduce visibility on roadways and cause dangerous driving conditions. Visibility can quickly drop to zero unexpectedly. | Hazardous FOG in [location] [may/will] significantly reduce visibility on roadways and cause dangerous driving conditions. Visibility can quickly drop to zero unexpectedly. |
| 4. HAZARD LOCATION: Where is the hazardous event occurring? If the hazard is moving, in what direction is it moving or likely to move? | <i>Select well-known landmarks; town/city/county (all or portion); major road(s)/intersection(s).</i>                                                                        | <i>Select well-known landmarks; town/city/county (all or portion); major road(s)/intersection(s).</i>                                                                        |
| 5. RESPONSE LOCATION: Is there a specific location that should be evacuated or avoided by people? If so, where should they go?         | <i>Select well-known landmarks; town/city/county (all or portion); major road(s)/intersection(s).</i>                                                                        | <i>Select well-known landmarks; town/city/county (all or portion); major road(s)/intersection(s).</i>                                                                        |
| 6. PROTECTIVE ACTION GUIDANCE: What are the specific                                                                                   | <ul style="list-style-type: none"> <li>• DELAY road travel [due to reduced visibility, due to slick roads, to avoid damage to vehicle, etc.]</li> </ul>                      | <ul style="list-style-type: none"> <li>• DELAY road travel [due to reduced visibility, due to slick roads, to avoid damage to vehicle, etc.]</li> </ul>                      |

|                                                                              |                                                                                                                                                              |                                                                                                                                                              |
|------------------------------------------------------------------------------|--------------------------------------------------------------------------------------------------------------------------------------------------------------|--------------------------------------------------------------------------------------------------------------------------------------------------------------|
| actions people receiving the message should take?                            | <ul style="list-style-type: none"> <li>• IF DRIVING, make sure headlights are on. [Do/do not] use high beams.</li> <li>• IF DRIVING, reduce speed</li> </ul> | <ul style="list-style-type: none"> <li>• IF DRIVING, make sure headlights are on. [Do/do not] use high beams.</li> <li>• IF DRIVING, reduce speed</li> </ul> |
| 7. TIME: When should people take protective action? Will the message expire? | NOW; before ## (AM/PM); until ## (AM/PM)                                                                                                                     | NOW; before ## (AM/PM); until ## (AM/PM)                                                                                                                     |
| 8. ADDITIONAL GUIDANCE: Where should people go for updates?                  | <ul style="list-style-type: none"> <li>• CHECK [source] for [updates/information] at [info]</li> </ul>                                                       | <ul style="list-style-type: none"> <li>• CHECK [source] for [updates/information] at [info]</li> </ul>                                                       |

#### Pre-event Message Template

- [Source] Hazardous FOG in [location] [may/will] significantly reduce visibility on roadways and cause dangerous driving conditions. Visibility can quickly drop to zero unexpectedly. DELAY road travel [due to reduced visibility, due to slick roads, to avoid damage to vehicle, etc.] until ## (AM/PM). CHECK [source] for [updates/information] at [info].

#### During/Post Event Message Template

- [Source] Hazardous FOG in [location] at ## (AM/PM) [may/will] significantly reduce visibility on roadways and cause dangerous driving conditions. Visibility can quickly drop to zero unexpectedly. DELAY road travel [due to reduced visibility, due to slick roads, to avoid damage to vehicle, etc.] until ##(AM/PM). CHECK [source] for [updates/information] at [info].

**HAIL**

| MESSAGE WRITING STEPS                                                                                                                  | PRE-EVENT CONTENT                                                                                                                                            | DURING OR POST-EVENT CONTENT                                                                                                                                 |
|----------------------------------------------------------------------------------------------------------------------------------------|--------------------------------------------------------------------------------------------------------------------------------------------------------------|--------------------------------------------------------------------------------------------------------------------------------------------------------------|
| 1. SOURCE: Which agency should be listed as the source of this message?                                                                | <i>Select a source that is familiar and trusted. Do not use an acronym for the source.</i>                                                                   | <i>Select a source that is familiar and trusted. Do not use an acronym for the source.</i>                                                                   |
| 2. HAZARD: What type of hazardous event is happening or about to happen?                                                               | HAIL                                                                                                                                                         | HAIL                                                                                                                                                         |
| 3. HAZARD IMPACTS: What are the consequences of this threat that the public should be aware of or how will it affect them personally?  | HAIL in [location] [may/will] injure people and animals outdoors, and cause damage to vehicles and buildings.                                                | HAIL in [location] [may/will] injure people and animals outdoors, and cause damage to vehicles and buildings.                                                |
| 4. HAZARD LOCATION: Where is the hazardous event occurring? If the hazard is moving, in what direction is it moving or likely to move? | <i>Select well-known landmarks; town/city/county (all or portion); major road(s)/intersection(s).</i>                                                        | <i>Select well-known landmarks; town/city/county (all or portion); major road(s)/intersection(s).</i>                                                        |
| 5. RESPONSE LOCATION: Is there a specific location that should be evacuated or avoided by people? If so, where should they go?         | <i>Select well-known landmarks; town/city/county (all or portion); major road(s)/intersection(s).</i>                                                        | <i>Select well-known landmarks; town/city/county (all or portion); major road(s)/intersection(s).</i>                                                        |
| 6. PROTECTIVE ACTION GUIDANCE: What are the specific actions people receiving the message should take?                                 | <ul style="list-style-type: none"> <li>• AVOID [glass, windows, outside doors, walls]</li> <li>• AVOID travel [until further notice/until [time]]</li> </ul> | <ul style="list-style-type: none"> <li>• AVOID [glass, windows, outside doors, walls]</li> <li>• AVOID travel [until further notice/until [time]]</li> </ul> |

|                                                                              |                                                                                                                                                                                                                                                                                                                                                                                                                 |                                                                                                                                                                                                                                                                                                                                                                                                                 |
|------------------------------------------------------------------------------|-----------------------------------------------------------------------------------------------------------------------------------------------------------------------------------------------------------------------------------------------------------------------------------------------------------------------------------------------------------------------------------------------------------------|-----------------------------------------------------------------------------------------------------------------------------------------------------------------------------------------------------------------------------------------------------------------------------------------------------------------------------------------------------------------------------------------------------------------|
|                                                                              | <ul style="list-style-type: none"> <li>• BRING pets and other animals indoors</li> <li>• DELAY road travel [due to reduced visibility, due to slick roads, to avoid damage to vehicle, etc.]</li> <li>• IF DRIVING, safely pull off the road and stay in your vehicle with your seatbelt on. Wait for an all-clear notice.</li> <li>• IF OUTSIDE [OR DRIVING], go inside the nearest sturdy building</li> </ul> | <ul style="list-style-type: none"> <li>• BRING pets and other animals indoors</li> <li>• DELAY road travel [due to reduced visibility, due to slick roads, to avoid damage to vehicle, etc.]</li> <li>• IF DRIVING, safely pull off the road and stay in your vehicle with your seatbelt on. Wait for an all-clear notice.</li> <li>• IF OUTSIDE [OR DRIVING], go inside the nearest sturdy building</li> </ul> |
| 7. TIME: When should people take protective action? Will the message expire? | NOW; before ## (AM/PM); until ## (AM/PM)                                                                                                                                                                                                                                                                                                                                                                        | NOW; before ## (AM/PM); until ## (AM/PM)                                                                                                                                                                                                                                                                                                                                                                        |
| 8. ADDITIONAL GUIDANCE: Where should people go for updates?                  | <ul style="list-style-type: none"> <li>• CHECK [source] for [updates/information] at [info]</li> </ul>                                                                                                                                                                                                                                                                                                          | CHECK [source] for [updates/information] at [info]                                                                                                                                                                                                                                                                                                                                                              |

### Pre-event Message Template

- [Source] HAIL expected at ## (AM/PM) in [location] [may/will] injure people and animals outdoors, and cause damage to vehicles and buildings. BRING pets and other animals indoors. DELAY road travel [due to reduced visibility, due to slick roads, to avoid damage to vehicle, etc.] until ## (AM/PM). CHECK [source] for [updates/information] at [info].

### During/Post Event Message Template

- [Source] HAIL occurring in [location] at ## (AM/PM) [may/will] injure people and animals outdoors, and cause damage to vehicles and buildings. BRING pets and other animals indoors NOW. IF [OUTSIDE/DRIVING], go inside the nearest sturdy building. CHECK [source] for [updates/information] at [info].

**HEAVY SNOW**

| MESSAGE WRITING STEPS                                                                                                                  | PRE-EVENT CONTENT                                                                                                                               | DURING OR POST-EVENT CONTENT                                                                                                           |
|----------------------------------------------------------------------------------------------------------------------------------------|-------------------------------------------------------------------------------------------------------------------------------------------------|----------------------------------------------------------------------------------------------------------------------------------------|
| 1. SOURCE: Which agency should be listed as the source of this message?                                                                | <i>Select a source that is familiar and trusted. Do not use an acronym for the source.</i>                                                      | <i>Select a source that is familiar and trusted. Do not use an acronym for the source.</i>                                             |
| 2. HAZARD: What type of hazardous event is happening or about to happen?                                                               | HEAVY SNOWFALL                                                                                                                                  | HEAVY SNOWFALL                                                                                                                         |
| 3. HAZARD IMPACTS: What are the consequences of this threat that the public should be aware of or how will it affect them personally?  | HEAVY SNOWFALL expected in [location]. Heavy snowfall [may/will] cause major travel problems, strand commuters, and disrupt emergency services. | HEAVY SNOWFALL in [location]. Heavy snowfall [may/will] cause major travel problems, strand commuters, and disrupt emergency services. |
| 4. HAZARD LOCATION: Where is the hazardous event occurring? If the hazard is moving, in what direction is it moving or likely to move? | <i>Select well-known landmarks; town/city/county (all or portion); major road(s)/intersection(s).</i>                                           | <i>Select well-known landmarks; town/city/county (all or portion); major road(s)/intersection(s).</i>                                  |
| 5. RESPONSE LOCATION: Is there a specific location that should be evacuated or avoided by people? If so, where should they go?         | <i>Select well-known landmarks; town/city/county (all or portion); major road(s)/intersection(s).</i>                                           | <i>Select well-known landmarks; town/city/county (all or portion); major road(s)/intersection(s).</i>                                  |
| 6. PROTECTIVE ACTION GUIDANCE: What are the specific actions people receiving the message should take?                                 | <ul style="list-style-type: none"> <li>• PREPARE by having non-perishable food and water on hand by [time]</li> </ul>                           | <ul style="list-style-type: none"> <li>• AVOID travel [until further notice/until [time]</li> </ul>                                    |

|                                                                              |                                                                                                               |                                                                                                                                                                                                                                                                                                                                                                                                                                                            |
|------------------------------------------------------------------------------|---------------------------------------------------------------------------------------------------------------|------------------------------------------------------------------------------------------------------------------------------------------------------------------------------------------------------------------------------------------------------------------------------------------------------------------------------------------------------------------------------------------------------------------------------------------------------------|
|                                                                              |                                                                                                               | <ul style="list-style-type: none"> <li>• DELAY road travel [due to reduced visibility, due to slick roads, to avoid damage to vehicle, etc.]</li> <li>• IF DRIVING, reduce speed</li> <li>• IF DRIVING, leave extra space between cars</li> <li>• IF DRIVING, and you become stranded, hang a distress flag from the antenna or window and stay in your vehicle. Use seat covers and floor mats for insulation or huddle with other passengers.</li> </ul> |
| 7. TIME: When should people take protective action? Will the message expire? | NOW; before ## (AM/PM); until ## (AM/PM)                                                                      | NOW; before ## (AM/PM); until ## (AM/PM)                                                                                                                                                                                                                                                                                                                                                                                                                   |
| 8. ADDITIONAL GUIDANCE: Where should people go for updates?                  | <ul style="list-style-type: none"> <li>• CHECK [source] for [updates/information] at [web address]</li> </ul> | <ul style="list-style-type: none"> <li>• CHECK [source] for [updates/information] at [web address]</li> </ul>                                                                                                                                                                                                                                                                                                                                              |

### Pre-event Message Template

- [Source] HEAVY SNOWFALL expected in [location] beginning ## (AM/PM). Heavy snowfall [may/will] cause major travel problems, strand commuters, and disrupt emergency services. PREPARE by having non-perishable food and water on hand by [time]. CHECK [source] for [updates/information] at [web address].

### During/Post Event Message Template

- [Source] HEAVY SNOWFALL in [location] until ## (AM/PM). Heavy snowfall [may/will] cause major travel problems, strand commuters, and disrupt emergency services. AVOID travel [until further notice/until [time]]

**HEAVY RAIN**

| MESSAGE WRITING STEPS                                                                                                                  | PRE-EVENT CONTENT                                                                                                                 | DURING OR POST-EVENT CONTENT                                                                                                      |
|----------------------------------------------------------------------------------------------------------------------------------------|-----------------------------------------------------------------------------------------------------------------------------------|-----------------------------------------------------------------------------------------------------------------------------------|
| 1. SOURCE: Which agency should be listed as the source of this message?                                                                | <i>Select a source that is familiar and trusted. Do not use an acronym for the source.</i>                                        | <i>Select a source that is familiar and trusted. Do not use an acronym for the source.</i>                                        |
| 2. HAZARD: What type of hazardous event is happening or about to happen?                                                               | HEAVY RAIN                                                                                                                        | HEAVY RAIN                                                                                                                        |
| 3. HAZARD IMPACTS: What are the consequences of this threat that the public should be aware of or how will it affect them personally?  | HEAVY RAIN in [location] [may/will] reduce visibility and cause flooding of roadways and low-lying areas.                         | HEAVY RAIN in [location] [may/will] reduce visibility and cause flooding of roadways and low-lying areas.                         |
| 4. HAZARD LOCATION: Where is the hazardous event occurring? If the hazard is moving, in what direction is it moving or likely to move? | <i>Select well-known landmarks; town/city/county (all or portion); major road(s)/intersection(s).</i>                             | <i>Select well-known landmarks; town/city/county (all or portion); major road(s)/intersection(s).</i>                             |
| 5. RESPONSE LOCATION: Is there a specific location that should be evacuated or avoided by people? If so, where should they go?         | <i>Select well-known landmarks; town/city/county (all or portion); major road(s)/intersection(s).</i>                             | <i>Select well-known landmarks; town/city/county (all or portion); major road(s)/intersection(s).</i>                             |
| 6. PROTECTIVE ACTION GUIDANCE: What are the specific actions people receiving the message should take?                                 | <ul style="list-style-type: none"> <li>• AVOID rising water</li> <li>• AVOID travel [until further notice/until [time]</li> </ul> | <ul style="list-style-type: none"> <li>• AVOID rising water</li> <li>• AVOID travel [until further notice/until [time]</li> </ul> |

|                                                                              |                                                                                                                                                                                                                                                                                                                                                                                                                                   |                                                                                                                                                                                                                                                                                                                                                                                                                                   |
|------------------------------------------------------------------------------|-----------------------------------------------------------------------------------------------------------------------------------------------------------------------------------------------------------------------------------------------------------------------------------------------------------------------------------------------------------------------------------------------------------------------------------|-----------------------------------------------------------------------------------------------------------------------------------------------------------------------------------------------------------------------------------------------------------------------------------------------------------------------------------------------------------------------------------------------------------------------------------|
|                                                                              | <ul style="list-style-type: none"> <li>• DELAY road travel [due to reduced visibility, due to slick roads, to avoid damage to vehicle, etc.]</li> <li>• DO NOT walk or drive through moving water or on flooded roadways</li> <li>• IF DRIVING, do not drive around a barricade or on closed roads</li> <li>• IF DRIVING, make sure headlights are on. [Do/do not] use high beams.</li> <li>• IF DRIVING, reduce speed</li> </ul> | <ul style="list-style-type: none"> <li>• DELAY road travel [due to reduced visibility, due to slick roads, to avoid damage to vehicle, etc.]</li> <li>• DO NOT walk or drive through moving water or on flooded roadways</li> <li>• IF DRIVING, do not drive around a barricade or on closed roads</li> <li>• IF DRIVING, make sure headlights are on. [Do/do not] use high beams.</li> <li>• IF DRIVING, reduce speed</li> </ul> |
| 7. TIME: When should people take protective action? Will the message expire? | NOW; before ## (AM/PM); until ## (AM/PM)                                                                                                                                                                                                                                                                                                                                                                                          | NOW; before ## (AM/PM); until ## (AM/PM)                                                                                                                                                                                                                                                                                                                                                                                          |
| 8. ADDITIONAL GUIDANCE: Where should people go for updates?                  | <ul style="list-style-type: none"> <li>• CHECK [source] for [updates/information] at [info]</li> </ul>                                                                                                                                                                                                                                                                                                                            | CHECK [source] for [updates/information] at [info]                                                                                                                                                                                                                                                                                                                                                                                |

### Pre-event Message Template

- [Source] HEAVY RAIN in [location] expected to begin at ## (AM/PM) [may/will] reduce visibility and cause flooding of roadways and low-lying areas. AVOID rising water. AVOID travel [until further notice/until [time]]. CHECK [source] for [updates/information] at [info].

### During/Post Event Message Template

- [Source] HEAVY RAIN in [location] until ## (AM/PM) [may/will] reduce visibility and cause flooding of roadways and low-lying areas. AVOID rising water. IF DRIVING, do not drive around a barricade or on closed roads. CHECK [source] for [updates/information] at [info].



**HIGH WINDS**

| MESSAGE WRITING STEPS                                                                                                                  | PRE-EVENT CONTENT                                                                                                                                                            | DURING OR POST-EVENT CONTENT                                                                                                                                                        |
|----------------------------------------------------------------------------------------------------------------------------------------|------------------------------------------------------------------------------------------------------------------------------------------------------------------------------|-------------------------------------------------------------------------------------------------------------------------------------------------------------------------------------|
| 1. SOURCE: Which agency should be listed as the source of this message?                                                                | <i>Select a source that is familiar and trusted. Do not use an acronym for the source.</i>                                                                                   | <i>Select a source that is familiar and trusted. Do not use an acronym for the source.</i>                                                                                          |
| 2. HAZARD: What type of hazardous event is happening or about to happen?                                                               | HIGH WINDS                                                                                                                                                                   | HIGH WINDS                                                                                                                                                                          |
| 3. HAZARD IMPACTS: What are the consequences of this threat that the public should be aware of or how will it affect them personally?  | HIGH WINDS in [location]. High winds are dangerous winds that can cause power outages, damage to buildings, and carry flying debris, which can cause severe injury or death. | HIGH WIND warning in [location]. High winds are dangerous winds that can cause power outages, damage to buildings, and carry flying debris, which can cause severe injury or death. |
| 4. HAZARD LOCATION: Where is the hazardous event occurring? If the hazard is moving, in what direction is it moving or likely to move? | <i>Select well-known landmarks; town/city/county (all or portion); major road(s)/intersection(s).</i>                                                                        | <i>Select well-known landmarks; town/city/county (all or portion); major road(s)/intersection(s).</i>                                                                               |
| 5. RESPONSE LOCATION: Is there a specific location that should be evacuated or avoided by people? If so, where should they go?         | <i>Select well-known landmarks; town/city/county (all or portion); major road(s)/intersection(s).</i>                                                                        | <i>Select well-known landmarks; town/city/county (all or portion); major road(s)/intersection(s).</i>                                                                               |
| 6. PROTECTIVE ACTION GUIDANCE: What are the specific actions people receiving the message should take?                                 | <ul style="list-style-type: none"> <li>• BRING pets and other animals indoors</li> <li>• PREPARE for power outages by fully charging your cell phone and</li> </ul>          | <ul style="list-style-type: none"> <li>• AVOID [downed trees, anything that may be touching downed power lines, and debris]</li> </ul>                                              |

|                                                                              |                                                                                                                                                                                                                                                          |                                                                                                                                                                                                                                                                                                                                                                                                                                                                 |
|------------------------------------------------------------------------------|----------------------------------------------------------------------------------------------------------------------------------------------------------------------------------------------------------------------------------------------------------|-----------------------------------------------------------------------------------------------------------------------------------------------------------------------------------------------------------------------------------------------------------------------------------------------------------------------------------------------------------------------------------------------------------------------------------------------------------------|
|                                                                              | backup batteries/external power packs <ul style="list-style-type: none"> <li>• PREPARE for power outages by testing batteries in radios and flashlights by [time]</li> <li>• SECURE outdoor objects, such as outdoor furniture and trash cans</li> </ul> | <ul style="list-style-type: none"> <li>• AVOID [glass, windows, outside doors, walls]</li> <li>• BRING pets and other animals indoors</li> <li>• IF OUTSIDE [OR DRIVING], go inside the nearest sturdy building, in a small interior room or on the lowest level</li> <li>• STAY indoors until further notice</li> <li>• STAY in an interior room of a sturdy building or in the lowest level in the building and wait for an all-clear notification</li> </ul> |
| 7. TIME: When should people take protective action? Will the message expire? | NOW; before ## (AM/PM); until ## (AM/PM)                                                                                                                                                                                                                 | NOW; before ## (AM/PM); until ## (AM/PM)                                                                                                                                                                                                                                                                                                                                                                                                                        |
| 8. ADDITIONAL GUIDANCE: Where should people go for updates?                  | <ul style="list-style-type: none"> <li>• CHECK [source] for [updates/information] at [info]</li> </ul>                                                                                                                                                   | <ul style="list-style-type: none"> <li>• CHECK [source] for [updates/information] at [info]</li> </ul>                                                                                                                                                                                                                                                                                                                                                          |

### Pre-event Message Template

- [Source] HIGH WINDS in [location] expected to begin at ## (AM/PM). High winds are dangerous winds that can cause power outages, damage to buildings, and carry flying debris, which can cause severe injury or death. PREPARE for power outages by testing batteries in radios and flashlights by [time]. SECURE outdoor objects, such as outdoor furniture and trash cans.

### During/Post Event Message Template

- [Source] HIGH WIND warning in [location] at ## (AM/PM). High winds are dangerous winds that can cause power outages, damage to buildings, and carry flying debris, which can cause severe injury or death. IF [OUTSIDE/DRIVING], go inside the nearest sturdy building, in a small interior room or on the lowest level. STAY indoors until further notice.

**NOTE: Wireless Emergency Alerts for Extreme Wind Warnings are issued by the National Weather Service. Information provided here should not supplant the guidance provided by your local Weather Forecast Office.**

**HURRICANE/TROPICAL CYCLONE/TROPICAL STORM**

| MESSAGE WRITING STEPS                                                                                                                  | PRE-EVENT CONTENT                                                                                                                                                                                                             | DURING OR POST-EVENT CONTENT                                                                                                                                                                               |
|----------------------------------------------------------------------------------------------------------------------------------------|-------------------------------------------------------------------------------------------------------------------------------------------------------------------------------------------------------------------------------|------------------------------------------------------------------------------------------------------------------------------------------------------------------------------------------------------------|
| 1. SOURCE: Which agency should be listed as the source of this message?                                                                | <i>Select a source that is familiar and trusted. Do not use an acronym for the source.</i>                                                                                                                                    | <i>Select a source that is familiar and trusted. Do not use an acronym for the source.</i>                                                                                                                 |
| 2. HAZARD: What type of hazardous event is happening or about to happen?                                                               | HURRICANE/TROPICAL CYCLONE/TROPICAL STORM                                                                                                                                                                                     | HURRICANE/TROPICAL CYCLONE/TROPICAL STORM                                                                                                                                                                  |
| 3. HAZARD IMPACTS: What are the consequences of this threat that the public should be aware of or how will it affect them personally?  | [Hurricane/Tropical Cyclone/Tropical Storm] expected at [time] [may/will] cause damaging winds and flooding, leading to injury or death, loss of power and water, flying debris, and damage to buildings, roads, and bridges. | [Hurricane/Tropical Cyclone/Tropical Storm] [may/will] cause damaging winds and flooding, leading to injury or death, loss of power and water, flying debris, and damage to buildings, roads, and bridges. |
| 4. HAZARD LOCATION: Where is the hazardous event occurring? If the hazard is moving, in what direction is it moving or likely to move? | <i>Select well-known landmarks; town/city/county (all or portion); major road(s)/intersection(s).</i>                                                                                                                         | <i>Select well-known landmarks; town/city/county (all or portion); major road(s)/intersection(s).</i>                                                                                                      |
| 5. RESPONSE LOCATION: Is there a specific location that should be evacuated or avoided by people? If so, where should they go?         | <i>Select well-known landmarks; town/city/county (all or portion); major road(s)/intersection(s).</i>                                                                                                                         | <i>Select well-known landmarks; town/city/county (all or portion); major road(s)/intersection(s).</i>                                                                                                      |

|                                                                                                                      |                                                                                                                                                                                                                                                                                                                                                                                                                                                                                                                                                                                                                                                                                                                                                                                                                                                                                                                                                                                                                                                |                                                                                                                                                                                                                                                                                                                                                                                                                                                                                                                                                                                                                                                                                                                                                                                                                                                                                                                                                                                                                                                                                                                                                                           |
|----------------------------------------------------------------------------------------------------------------------|------------------------------------------------------------------------------------------------------------------------------------------------------------------------------------------------------------------------------------------------------------------------------------------------------------------------------------------------------------------------------------------------------------------------------------------------------------------------------------------------------------------------------------------------------------------------------------------------------------------------------------------------------------------------------------------------------------------------------------------------------------------------------------------------------------------------------------------------------------------------------------------------------------------------------------------------------------------------------------------------------------------------------------------------|---------------------------------------------------------------------------------------------------------------------------------------------------------------------------------------------------------------------------------------------------------------------------------------------------------------------------------------------------------------------------------------------------------------------------------------------------------------------------------------------------------------------------------------------------------------------------------------------------------------------------------------------------------------------------------------------------------------------------------------------------------------------------------------------------------------------------------------------------------------------------------------------------------------------------------------------------------------------------------------------------------------------------------------------------------------------------------------------------------------------------------------------------------------------------|
| <p>6. PROTECTIVE ACTION</p> <p>GUIDANCE: What are the specific actions people receiving the message should take?</p> | <ul style="list-style-type: none"> <li>• BE READY to [evacuate/leave] [location] when advised by local officials</li> <li>• DO NOT return to area after evacuation [until/unless] [authorized/directed] by local officials</li> <li>• FOLLOW designated evacuation routes [info]</li> <li>• FOLLOW evacuation orders [info]</li> <li>• FOLLOW instructions from [source]</li> <li>• IF without safe shelter, go to a recommended public shelter by [time]: [info]</li> <li>• IF you are alone and unable to [evacuate, etc.], contact local authorities at [contact info]</li> <li>• LEAVE areas near [location]</li> <li>• PREPARE by getting your essential documents, including: [birth certificate, passports, driver's license, social security card, insurance cards, etc.] and [taking/keeping] them with you</li> <li>• PREPARE for power outages by fully charging your cell phone and backup batteries/external power packs</li> <li>• PREPARE for power outages by testing batteries in radios and flashlights by [time]</li> </ul> | <ul style="list-style-type: none"> <li>• AVOID [downed trees, anything that may be touching downed power lines, and debris]</li> <li>• AVOID [glass, windows, outside doors, walls]</li> <li>• COVER your face and head with your arms, a coat, or blanket to avoid injury from flying debris</li> <li>• DO NOT walk or drive through moving water or on flooded roadways</li> <li>• DO NOT return to area after evacuation [until/unless] [authorized/directed] by local officials</li> <li>• FOLLOW designated evacuation routes [info]</li> <li>• FOLLOW evacuation orders [info]</li> <li>• FOLLOW instructions from [source]</li> <li>• IF without safe shelter, go to a recommended public shelter by [time]: [info]</li> <li>• IF you are alone and unable to [evacuate, etc.], contact local authorities at [contact info]</li> <li>• LEAVE areas near [location]</li> <li>• IF DRIVING, and floodwaters rise around your car, seek refuge on the roof or abandon the car for higher ground on foot</li> <li>• IF IN A LOW-LYING AREA, move to higher ground</li> <li>• IF TRAPPED, go to the highest level of your home/building, including the roof.</li> </ul> |
|----------------------------------------------------------------------------------------------------------------------|------------------------------------------------------------------------------------------------------------------------------------------------------------------------------------------------------------------------------------------------------------------------------------------------------------------------------------------------------------------------------------------------------------------------------------------------------------------------------------------------------------------------------------------------------------------------------------------------------------------------------------------------------------------------------------------------------------------------------------------------------------------------------------------------------------------------------------------------------------------------------------------------------------------------------------------------------------------------------------------------------------------------------------------------|---------------------------------------------------------------------------------------------------------------------------------------------------------------------------------------------------------------------------------------------------------------------------------------------------------------------------------------------------------------------------------------------------------------------------------------------------------------------------------------------------------------------------------------------------------------------------------------------------------------------------------------------------------------------------------------------------------------------------------------------------------------------------------------------------------------------------------------------------------------------------------------------------------------------------------------------------------------------------------------------------------------------------------------------------------------------------------------------------------------------------------------------------------------------------|

|                                                                              |                                                                                                                                                                                                                                                                                                                                                                                          |                                                                                                                                                                                                                                                                                                         |
|------------------------------------------------------------------------------|------------------------------------------------------------------------------------------------------------------------------------------------------------------------------------------------------------------------------------------------------------------------------------------------------------------------------------------------------------------------------------------|---------------------------------------------------------------------------------------------------------------------------------------------------------------------------------------------------------------------------------------------------------------------------------------------------------|
|                                                                              | <ul style="list-style-type: none"> <li>• PREPARE now by getting essential supplies for you and those in your care, including pets and babies: [food, water, cash, medication, gas, glasses/contacts, hearing aids, pet supplies, pet carriers, baby supplies, etc.] and [take/keep] them with you</li> <li>• SECURE outdoor objects, such as outdoor furniture and trash cans</li> </ul> | <p>Do not climb into a closed attic. You may be unable to escape</p> <ul style="list-style-type: none"> <li>• STAY in an interior room of a sturdy building or in the lowest level in the building and wait for an all-clear notification</li> <li>• STAY off bridges over fast moving water</li> </ul> |
| 7. TIME: When should people take protective action? Will the message expire? | NOW; before ## (AM/PM); until ## (AM/PM)                                                                                                                                                                                                                                                                                                                                                 | NOW; before ## (AM/PM); until ## (AM/PM)                                                                                                                                                                                                                                                                |
| 8. ADDITIONAL GUIDANCE: Where should people go for updates?                  | <ul style="list-style-type: none"> <li>• CHECK [source] for [updates/information] at [info]</li> <li>• VISIT [URL] for evacuation preparation</li> </ul>                                                                                                                                                                                                                                 | <ul style="list-style-type: none"> <li>• CHECK [source] for [updates/information] at [info]</li> </ul>                                                                                                                                                                                                  |

### Pre-event Message Template

- [Source] [HURRICANE/TROPICAL CYCLONE/TROPICAL STORM] expected at ## (AM/PM) [may/will] cause damaging winds and flooding, leading to injury or death, loss of power and water, flying debris, and damage to buildings, roads, and bridges. LEAVE areas near [location] beginning ## (AM/PM). IF without safe shelter, go to a recommended public shelter by [time]: [info]. IF you are alone and unable to [evacuate, etc.], contact local authorities at [contact info]

### During/Post Event Message Template

- [Source] [HURRICANE/TROPICAL CYCLONE/TROPICAL STORM] [may/will] cause damaging winds and flooding, leading to injury or death, loss of power and water, flying debris, and damage to buildings, roads, and bridges. STAY in an interior room of a sturdy building or in the lowest level in the building and wait for an all-clear notification. AVOID [glass, windows, outside doors, walls]. COVER your face and head with your arms, a coat, or blanket to avoid injury from flying debris.

**NOTE: Wireless Emergency Alerts for Hurricane/Typhoon are issued by the National Weather Service. Information provided here should not supplant the guidance provided by your local Weather Forecast Office.**

**ICE STORM**

| MESSAGE WRITING STEPS                                                                                                                  | PRE-EVENT CONTENT                                                                                                                                                                                                             | DURING OR POST-EVENT CONTENT                                                                                                                                                                                                   |
|----------------------------------------------------------------------------------------------------------------------------------------|-------------------------------------------------------------------------------------------------------------------------------------------------------------------------------------------------------------------------------|--------------------------------------------------------------------------------------------------------------------------------------------------------------------------------------------------------------------------------|
| 1. SOURCE: Which agency should be listed as the source of this message?                                                                | <i>Select a source that is familiar and trusted. Do not use an acronym for the source.</i>                                                                                                                                    | <i>Select a source that is familiar and trusted. Do not use an acronym for the source.</i>                                                                                                                                     |
| 2. HAZARD: What type of hazardous event is happening or about to happen?                                                               | ICE STORM                                                                                                                                                                                                                     | ICE STORM                                                                                                                                                                                                                      |
| 3. HAZARD IMPACTS: What are the consequences of this threat that the public should be aware of or how will it affect them personally?  | ICE STORM expected in [ <i>location</i> ]. Even a small amount of ice on roads [ <i>may/will</i> ] make travel [ <i>difficult/dangerous</i> ]. Ice can topple trees and power lines and can cut off power and communications. | ICE STORM occurring in [ <i>location</i> ]. Even a small amount of ice on roads [ <i>may/will</i> ] make travel [ <i>difficult/dangerous</i> ]. Ice can topple trees and power lines and can cut off power and communications. |
| 4. HAZARD LOCATION: Where is the hazardous event occurring? If the hazard is moving, in what direction is it moving or likely to move? | <i>Select well-known landmarks; town/city/county (all or portion); major road(s)/intersection(s).</i>                                                                                                                         | <i>Select well-known landmarks; town/city/county (all or portion); major road(s)/intersection(s).</i>                                                                                                                          |
| 5. RESPONSE LOCATION: Is there a specific location that should be evacuated or avoided by people? If so, where should they go?         | <i>Select well-known landmarks; town/city/county (all or portion); major road(s)/intersection(s).</i>                                                                                                                         | <i>Select well-known landmarks; town/city/county (all or portion); major road(s)/intersection(s).</i>                                                                                                                          |
| 6. PROTECTIVE ACTION GUIDANCE: What are the specific                                                                                   | <ul style="list-style-type: none"> <li>• PREPARE for power outages by fully charging your cell phone and</li> </ul>                                                                                                           | <ul style="list-style-type: none"> <li>• AVOID [downed trees, anything that may be touching downed power lines, and debris]</li> </ul>                                                                                         |

|                                                                              |                                                                                                                                                                                                                                                           |                                                                                                                                                                                                                                                                                                              |
|------------------------------------------------------------------------------|-----------------------------------------------------------------------------------------------------------------------------------------------------------------------------------------------------------------------------------------------------------|--------------------------------------------------------------------------------------------------------------------------------------------------------------------------------------------------------------------------------------------------------------------------------------------------------------|
| actions people receiving the message should take?                            | backup batteries/external power packs <ul style="list-style-type: none"> <li>• PREPARE for power outages by testing batteries in radios and flashlights by [time]</li> <li>• PREPARE by having non-perishable food and water on hand by [time]</li> </ul> | <ul style="list-style-type: none"> <li>• AVOID travel [until further notice/until [time]</li> <li>• IF DRIVING, and you become stranded, hang a distress flag from the antenna or window and stay in your vehicle. Use seat covers and floor mats for insulation or huddle with other passengers.</li> </ul> |
| 7. TIME: When should people take protective action? Will the message expire? | NOW; before ## (AM/PM); until ## (AM/PM)                                                                                                                                                                                                                  | NOW; before ## (AM/PM); until ## (AM/PM)                                                                                                                                                                                                                                                                     |
| 8. ADDITIONAL GUIDANCE: Where should people go for updates?                  | <ul style="list-style-type: none"> <li>• CHECK [source] for [updates/information] at [info]</li> </ul>                                                                                                                                                    | <ul style="list-style-type: none"> <li>• CHECK [source] for [updates/information] at [info]</li> </ul>                                                                                                                                                                                                       |

### Pre-event Message Template

- [Source] ICE STORM expected in [location] at ## (AM/PM). Even a small amount of ice on roads [may/will] make travel [difficult/dangerous]. Ice can topple trees and power lines and can cut off power and communications. PREPARE for power outages by testing batteries in radios and flashlights by [time]. CHECK [source] for [updates/information] at [info].

### During/Post Event Message Template

- [Source] ICE STORM occurring in [location] until ## (AM/PM). Even a small amount of ice on roads [may/will] make travel [difficult/dangerous]. Ice can topple trees and power lines and can cut off power and communications. AVOID travel [until further notice/until [time]. IF DRIVING, and you become stranded, hang a distress flag from the antenna or window and stay in your vehicle. Use seat covers and floor mats for insulation or huddle with other passengers. CHECK [source] for [updates/information] at [info].

**SEVERE THUNDERSTORM**

| MESSAGE WRITING STEPS                                                                                                                  | PRE-EVENT CONTENT                                                                                                                                                                                                        | DURING OR POST-EVENT CONTENT                                                                                                                                                                                                    |
|----------------------------------------------------------------------------------------------------------------------------------------|--------------------------------------------------------------------------------------------------------------------------------------------------------------------------------------------------------------------------|---------------------------------------------------------------------------------------------------------------------------------------------------------------------------------------------------------------------------------|
| 1. SOURCE: Which agency should be listed as the source of this message?                                                                | <i>Select a source that is familiar and trusted. Do not use an acronym for the source.</i>                                                                                                                               | <i>Select a source that is familiar and trusted. Do not use an acronym for the source.</i>                                                                                                                                      |
| 2. HAZARD: What type of hazardous event is happening or about to happen?                                                               | SEVERE THUNDERSTORM                                                                                                                                                                                                      | SEVERE THUNDERSTORM                                                                                                                                                                                                             |
| 3. HAZARD IMPACTS: What are the consequences of this threat that the public should be aware of or how will it affect them personally?  | A SEVERE THUNDERSTORM in [location]. This storm [may/will] create [extremely strong and damaging winds, very large hail, severe lightning, flash flooding], which can cause damage to property, severe injury, or death. | A SEVERE THUNDERSTORM is in [location] now. This storm [may/will] create [extremely strong and damaging winds, very large hail, severe lightning, flash flooding], which can cause damage to property, severe injury, or death. |
| 4. HAZARD LOCATION: Where is the hazardous event occurring? If the hazard is moving, in what direction is it moving or likely to move? | <i>Select well-known landmarks; town/city/county (all or portion); major road(s)/intersection(s).</i>                                                                                                                    | <i>Select well-known landmarks; town/city/county (all or portion); major road(s)/intersection(s).</i>                                                                                                                           |
| 5. RESPONSE LOCATION: Is there a specific location that should be evacuated or avoided by people? If so, where should they go?         | <i>Select well-known landmarks; town/city/county (all or portion); major road(s)/intersection(s).</i>                                                                                                                    | <i>Select well-known landmarks; town/city/county (all or portion); major road(s)/intersection(s).</i>                                                                                                                           |
| 6. PROTECTIVE ACTION GUIDANCE: What are the specific                                                                                   | <ul style="list-style-type: none"> <li>BRING pets and other animals indoors</li> </ul>                                                                                                                                   | <ul style="list-style-type: none"> <li>AVOID travel [until further notice/until [time]]</li> </ul>                                                                                                                              |



|                                                                              |                                                                                                                                                                                                                                                                                                                                     |                                                                                                                                                                                                                                                                                                                                                                                                                                                                                                                                                                                                                                                                                          |
|------------------------------------------------------------------------------|-------------------------------------------------------------------------------------------------------------------------------------------------------------------------------------------------------------------------------------------------------------------------------------------------------------------------------------|------------------------------------------------------------------------------------------------------------------------------------------------------------------------------------------------------------------------------------------------------------------------------------------------------------------------------------------------------------------------------------------------------------------------------------------------------------------------------------------------------------------------------------------------------------------------------------------------------------------------------------------------------------------------------------------|
| actions people receiving the message should take?                            | <ul style="list-style-type: none"> <li>• PREPARE for power outages by fully charging your cell phone and backup batteries/external power packs</li> <li>• PREPARE for power outages by testing batteries in radios and flashlights by [time]</li> <li>• SECURE outdoor objects, such as outdoor furniture and trash cans</li> </ul> | <ul style="list-style-type: none"> <li>• AVOID [downed trees, anything that may be touching downed power lines, and debris]</li> <li>• AVOID [glass, windows, outside doors, walls]</li> <li>• AVOID touching metal objects, such as metal fences, railings, and bleachers</li> <li>• DO NOT go outside</li> <li>• DO NOT travel by car or foot unless evacuating flooded area or under an evacuation order</li> <li>• IF OUTSIDE [OR DRIVING], go inside the nearest sturdy building, in a small interior room or on the lowest level</li> <li>• STAY in an interior room of a sturdy building or in the lowest level in the building and wait for an all-clear notification</li> </ul> |
| 7. TIME: When should people take protective action? Will the message expire? | NOW; before ## (AM/PM); until ## (AM/PM)                                                                                                                                                                                                                                                                                            | NOW; before ## (AM/PM); until ## (AM/PM)                                                                                                                                                                                                                                                                                                                                                                                                                                                                                                                                                                                                                                                 |
| 8. ADDITIONAL GUIDANCE: Where should people go for updates?                  | <ul style="list-style-type: none"> <li>• CHECK [source] for [updates/information] at [info]</li> </ul>                                                                                                                                                                                                                              | <ul style="list-style-type: none"> <li>• CHECK [source] for [updates/information] at [info]</li> </ul>                                                                                                                                                                                                                                                                                                                                                                                                                                                                                                                                                                                   |

### Pre-event Message Template

- [Source] A SEVERE THUNDERSTORM in [location] is expected at ## (AM/PM). This storm [may/will] create [extremely strong and damaging winds, very large hail, severe lightning, flash flooding], which can cause damage to property, severe injury, or death. SECURE outdoor objects, such as outdoor furniture and trash cans. BRING pets and other animals indoors NOW. CHECK [source] for [updates/information] at [info]

**During/Post Event Message Template**

- [Source] A SEVERE THUNDERSTORM in [location] at ## (AM/PM). This storm [may/will] create [extremely strong and damaging winds, very large hail, severe lightning, flash flooding], which can cause damage to property, severe injury, or death. STAY in an interior room of a sturdy building or in the lowest level in the building and wait for an all-clear notification. AVOID [glass, windows, outside doors, walls].

**NOTE: Wireless Emergency Alerts for Severe Thunderstorm are issued by the National Weather Service. Information provided here should not supplant the guidance provided by your local Weather Forecast Office.**

**SNOW SQUALL**

| MESSAGE WRITING STEPS                                                                                                                  | PRE-EVENT CONTENT                                                                                                                                 | DURING OR POST-EVENT CONTENT                                                                                                                     |
|----------------------------------------------------------------------------------------------------------------------------------------|---------------------------------------------------------------------------------------------------------------------------------------------------|--------------------------------------------------------------------------------------------------------------------------------------------------|
| 1. SOURCE: Which agency should be listed as the source of this message?                                                                | <i>Select a source that is familiar and trusted. Do not use an acronym for the source.</i>                                                        | <i>Select a source that is familiar and trusted. Do not use an acronym for the source.</i>                                                       |
| 2. HAZARD: What type of hazardous event is happening or about to happen?                                                               | SNOW SQUALL                                                                                                                                       | SNOW SQUALL                                                                                                                                      |
| 3. HAZARD IMPACTS: What are the consequences of this threat that the public should be aware of or how will it affect them personally?  | SNOW SQUALL expected in [location]. Snow squall is intense bursts of snow and wind and cause limited or no visibility and unsafe road conditions. | SNOW SQUALL warning in [location]. Snow squall is intense bursts of snow and wind and cause limited or no visibility and unsafe road conditions. |
| 4. HAZARD LOCATION: Where is the hazardous event occurring? If the hazard is moving, in what direction is it moving or likely to move? | <i>Select well-known landmarks; town/city/county (all or portion); major road(s)/intersection(s).</i>                                             | <i>Select well-known landmarks; town/city/county (all or portion); major road(s)/intersection(s).</i>                                            |
| 5. RESPONSE LOCATION: Is there a specific location that should be evacuated or avoided by people? If so, where should they go?         | <i>Select well-known landmarks; town/city/county (all or portion); major road(s)/intersection(s).</i>                                             | <i>Select well-known landmarks; town/city/county (all or portion); major road(s)/intersection(s).</i>                                            |
| 6. PROTECTIVE ACTION GUIDANCE: What are the specific                                                                                   | <ul style="list-style-type: none"> <li>• AVOID travel [until further notice/until [time]]</li> </ul>                                              | <ul style="list-style-type: none"> <li>• AVOID travel [until further notice/until [time]]</li> </ul>                                             |

|                                                                              |                                                                                                                                                                                                                                                                                                                   |                                                                                                                                                                                                                                                                                                                   |
|------------------------------------------------------------------------------|-------------------------------------------------------------------------------------------------------------------------------------------------------------------------------------------------------------------------------------------------------------------------------------------------------------------|-------------------------------------------------------------------------------------------------------------------------------------------------------------------------------------------------------------------------------------------------------------------------------------------------------------------|
| actions people receiving the message should take?                            | <ul style="list-style-type: none"> <li>• DELAY road travel [due to reduced visibility, due to slick roads, to avoid damage to vehicle, etc.]</li> <li>• IF DRIVING, reduce your speed, turn on your headlights and hazard lights and allow plenty of distance between you and the car in front of you.</li> </ul> | <ul style="list-style-type: none"> <li>• DELAY road travel [due to reduced visibility, due to slick roads, to avoid damage to vehicle, etc.]</li> <li>• IF DRIVING, reduce your speed, turn on your headlights and hazard lights and allow plenty of distance between you and the car in front of you.</li> </ul> |
| 7. TIME: When should people take protective action? Will the message expire? | NOW; before ## (AM/PM); until ## (AM/PM)                                                                                                                                                                                                                                                                          | NOW; before ## (AM/PM); until ## (AM/PM)                                                                                                                                                                                                                                                                          |
| 8. ADDITIONAL GUIDANCE: Where should people go for updates?                  | <ul style="list-style-type: none"> <li>• CHECK [source] for [updates/information] at [info]</li> </ul>                                                                                                                                                                                                            | CHECK [source] for [updates/information] at [info]                                                                                                                                                                                                                                                                |

### Pre-event Message Template

- [Source] SNOW SQUALL expected in [location] beginning ## (AM/PM). Snow squall is intense bursts of snow and wind and cause limited or no visibility and unsafe road conditions. DELAY road travel [due to reduced visibility, due to slick roads, to avoid damage to vehicle, etc.] until ## (AM/PM). CHECK [source] for [updates/information] at [info].

### During/Post Event Message Template

- [Source] SNOW SQUALL warning in [location] until ## (AM/PM). Snow squall is intense bursts of snow and wind and cause limited or no visibility and unsafe road conditions. AVOID travel [until further notice/until [time]]. IF DRIVING, reduce your speed, turn on your headlights and hazard lights and allow plenty of distance between you and the car in front of you. CHECK [source] for [updates/information] at [info].

**NOTE: Wireless Emergency Alerts for Snow Squall are issued by the National Weather Service. Information provided here should not supplant the guidance provided by your local Weather Forecast Office.**

**STORM SURGE**

| MESSAGE WRITING STEPS                                                                                                                  | PRE-EVENT CONTENT                                                                                                                                                                                                                     | DURING OR POST-EVENT CONTENT                                                                                                                                                                                                                                 |
|----------------------------------------------------------------------------------------------------------------------------------------|---------------------------------------------------------------------------------------------------------------------------------------------------------------------------------------------------------------------------------------|--------------------------------------------------------------------------------------------------------------------------------------------------------------------------------------------------------------------------------------------------------------|
| 1. SOURCE: Which agency should be listed as the source of this message?                                                                | <i>Select a source that is familiar and trusted. Do not use an acronym for the source.</i>                                                                                                                                            | <i>Select a source that is familiar and trusted. Do not use an acronym for the source.</i>                                                                                                                                                                   |
| 2. HAZARD: What type of hazardous event is happening or about to happen?                                                               | STORM SURGE                                                                                                                                                                                                                           | STORM SURGE                                                                                                                                                                                                                                                  |
| 3. HAZARD IMPACTS: What are the consequences of this threat that the public should be aware of or how will it affect them personally?  | STORM SURGE [may/will] cause significant flooding, leading to loss of power/ water, damage to buildings/roads/bridges, injury or death.                                                                                               | STORM SURGE [may/will] cause significant flooding, leading to loss of power/ water, damage to buildings/roads/bridges, injury or death.                                                                                                                      |
| 4. HAZARD LOCATION: Where is the hazardous event occurring? If the hazard is moving, in what direction is it moving or likely to move? | <i>Select well-known landmarks; town/city/county (all or portion); major road(s)/intersection(s).</i>                                                                                                                                 | <i>Select well-known landmarks; town/city/county (all or portion); major road(s)/intersection(s).</i>                                                                                                                                                        |
| 5. RESPONSE LOCATION: Is there a specific location that should be evacuated or avoided by people? If so, where should they go?         | <i>Select well-known landmarks; town/city/county (all or portion); major road(s)/intersection(s).</i>                                                                                                                                 | <i>Select well-known landmarks; town/city/county (all or portion); major road(s)/intersection(s).</i>                                                                                                                                                        |
| 6. PROTECTIVE ACTION GUIDANCE: What are the specific actions people receiving the message should take?                                 | <ul style="list-style-type: none"> <li>• BE READY to [evacuate/leave] [location] when advised by local officials</li> <li>• DO NOT return to area after evacuation [until/unless] [authorized/directed] by local officials</li> </ul> | <ul style="list-style-type: none"> <li>• AVOID rising water</li> <li>• DO NOT walk or drive through moving water or on flooded roadways</li> <li>• DO NOT return to area after evacuation [until/unless] [authorized/directed] by local officials</li> </ul> |

|  |                                                                                                                                                                                                                                                                                                                                                                                                                                                                                                                                                                                                                                                                                                                                                                                                                                                                                                                                                                                                                                                                                                                                                                  |                                                                                                                                                                                                                                                                                                                                                                                                                                                                                                                                                                                                                                                                                                                                                                                                                                                                                                          |
|--|------------------------------------------------------------------------------------------------------------------------------------------------------------------------------------------------------------------------------------------------------------------------------------------------------------------------------------------------------------------------------------------------------------------------------------------------------------------------------------------------------------------------------------------------------------------------------------------------------------------------------------------------------------------------------------------------------------------------------------------------------------------------------------------------------------------------------------------------------------------------------------------------------------------------------------------------------------------------------------------------------------------------------------------------------------------------------------------------------------------------------------------------------------------|----------------------------------------------------------------------------------------------------------------------------------------------------------------------------------------------------------------------------------------------------------------------------------------------------------------------------------------------------------------------------------------------------------------------------------------------------------------------------------------------------------------------------------------------------------------------------------------------------------------------------------------------------------------------------------------------------------------------------------------------------------------------------------------------------------------------------------------------------------------------------------------------------------|
|  | <ul style="list-style-type: none"> <li>• FOLLOW designated evacuation routes [<i>info</i>]</li> <li>• FOLLOW evacuation orders [<i>info</i>]</li> <li>• FOLLOW instructions from [<i>source</i>]</li> <li>• IF you are alone and unable to [evacuate, etc.], contact local authorities at [<i>contact info</i>]</li> <li>• LEAVE areas near [<i>location</i>]</li> <li>• MOVE inland away from beaches, marinas, harbors, shoreline areas and other water ways</li> <li>• PREPARE by getting your essential documents, including: [birth certificate, passports, driver's license, social security card, insurance cards, etc.] and [taking/keeping] them with you</li> <li>• PREPARE for power outages by fully charging your cell phone and backup batteries/external power packs</li> <li>• PREPARE for power outages by testing batteries in radios and flashlights by [time]</li> <li>• PREPARE now by getting essential supplies for you and those in your care, including pets and babies: [food, water, cash, medication, gas, glasses/contacts, hearing aids, pet supplies, pet carriers, baby supplies, etc.] and [take/keep] them with you</li> </ul> | <ul style="list-style-type: none"> <li>• FOLLOW designated evacuation routes [<i>info</i>]</li> <li>• FOLLOW evacuation orders [<i>info</i>]</li> <li>• FOLLOW instructions from [<i>source</i>]</li> <li>• IF you are alone and unable to [evacuate, etc.], contact local authorities at [<i>contact info</i>]</li> <li>• LEAVE areas near [<i>location</i>]</li> <li>• MOVE inland away from beaches, marinas, harbors, shoreline areas and other water ways</li> <li>• IF DRIVING, and floodwaters rise around your car, seek refuge on the roof or abandon the car for higher ground on foot</li> <li>• IF DRIVING, do not drive around a barricade or on closed roads</li> <li>• IF IN AN LOW-LYING AREA, move to higher ground</li> <li>• IF TRAPPED, go to the highest level of your home/building, including the roof. Do not climb into a closed attic. You may be unable to escape.</li> </ul> |
|--|------------------------------------------------------------------------------------------------------------------------------------------------------------------------------------------------------------------------------------------------------------------------------------------------------------------------------------------------------------------------------------------------------------------------------------------------------------------------------------------------------------------------------------------------------------------------------------------------------------------------------------------------------------------------------------------------------------------------------------------------------------------------------------------------------------------------------------------------------------------------------------------------------------------------------------------------------------------------------------------------------------------------------------------------------------------------------------------------------------------------------------------------------------------|----------------------------------------------------------------------------------------------------------------------------------------------------------------------------------------------------------------------------------------------------------------------------------------------------------------------------------------------------------------------------------------------------------------------------------------------------------------------------------------------------------------------------------------------------------------------------------------------------------------------------------------------------------------------------------------------------------------------------------------------------------------------------------------------------------------------------------------------------------------------------------------------------------|

|                                                                              |                                                                                                                                                      |                                                                                                      |
|------------------------------------------------------------------------------|------------------------------------------------------------------------------------------------------------------------------------------------------|------------------------------------------------------------------------------------------------------|
|                                                                              | <ul style="list-style-type: none"> <li>VISIT [URL] for evacuation preparation</li> </ul>                                                             |                                                                                                      |
| 7. TIME: When should people take protective action? Will the message expire? | NOW; before ## (AM/PM); until ## (AM/PM)                                                                                                             | NOW; before ## (AM/PM); until ## (AM/PM)                                                             |
| 8. ADDITIONAL GUIDANCE: Where should people go for updates?                  | <ul style="list-style-type: none"> <li>CHECK [source] for [updates/information] at [info]</li> <li>VISIT [URL] for evacuation preparation</li> </ul> | <ul style="list-style-type: none"> <li>CHECK [source] for [updates/information] at [info]</li> </ul> |

### Pre-event Message Template

- [Source] STORM SURGE expected in [location] at ## (AM/PM) [may/will] cause significant flooding, leading to loss of power/ water, damage to buildings/roads/bridges, injury or death. LEAVE areas near [location]. DO NOT return to area after evacuation [until/unless] [authorized/directed] by local officials. FOLLOW designated evacuation routes [info].

### During/Post Event Message Template

- [Source] STORM SURGE [may/will] cause significant flooding, leading to loss of power/ water, damage to buildings/roads/bridges, injury or death. LEAVE areas near [location] NOW. MOVE inland away from beaches, marinas, harbors, shoreline areas and other water ways. DO NOT walk or drive through moving water or on flooded roadways. IF you are alone and unable to [evacuate, etc.], contact local authorities at [contact info].

**NOTE: Wireless Emergency Alerts for Storm Surge are issued by the National Weather Service. Information provided here should not supplant the guidance provided by your local Weather Forecast Office.**

**TORNADO**

| MESSAGE WRITING STEPS                                                                                                                  | PRE-EVENT CONTENT                                                                                                                                                                                                        | DURING OR POST-EVENT CONTENT                                                                                                                                                                                                                                    |
|----------------------------------------------------------------------------------------------------------------------------------------|--------------------------------------------------------------------------------------------------------------------------------------------------------------------------------------------------------------------------|-----------------------------------------------------------------------------------------------------------------------------------------------------------------------------------------------------------------------------------------------------------------|
| 1. SOURCE: Which agency should be listed as the source of this message?                                                                | <i>Select a source that is familiar and trusted. Do not use an acronym for the source.</i>                                                                                                                               | <i>Select a source that is familiar and trusted. Do not use an acronym for the source.</i>                                                                                                                                                                      |
| 2. HAZARD: What type of hazardous event is happening or about to happen?                                                               | TORNADO                                                                                                                                                                                                                  | TORNADO                                                                                                                                                                                                                                                         |
| 3. HAZARD IMPACTS: What are the consequences of this threat that the public should be aware of or how will it affect them personally?  | TORNADO in [location] possible. Tornadoes contain [dangerous and life-threatening winds, hail, lightning, rain]. Tornadoes can cause power outages, destroy buildings, and carry flying debris, causing injury or death. | A [radar indicated/confirmed on the ground] TORNADO in [location] now. Tornadoes contain [dangerous and life-threatening winds, hail, lightning, rain]. Tornadoes can cause power outages, destroy buildings, and carry flying debris, causing injury or death. |
| 4. HAZARD LOCATION: Where is the hazardous event occurring? If the hazard is moving, in what direction is it moving or likely to move? | <i>Select well-known landmarks; town/city/county (all or portion); major road(s)/intersection(s).</i>                                                                                                                    | <i>Select well-known landmarks; town/city/county (all or portion); major road(s)/intersection(s).</i>                                                                                                                                                           |
| 5. RESPONSE LOCATION: Is there a specific location that should be evacuated or avoided by people? If so, where should they go?         | <i>Select well-known landmarks; town/city/county (all or portion); major road(s)/intersection(s).</i>                                                                                                                    | <i>Select well-known landmarks; town/city/county (all or portion); major road(s)/intersection(s).</i>                                                                                                                                                           |



|                                                                                                                      |                                                                                                                                                                                                                                                                                                                                                                                                                                                                                                                                                                                                                                                                                                                                                                                                                                                                                                      |                                                                                                                                                                                                                                                                                                                                                                                                                                                                                                                                                                                                                                                                                                                        |
|----------------------------------------------------------------------------------------------------------------------|------------------------------------------------------------------------------------------------------------------------------------------------------------------------------------------------------------------------------------------------------------------------------------------------------------------------------------------------------------------------------------------------------------------------------------------------------------------------------------------------------------------------------------------------------------------------------------------------------------------------------------------------------------------------------------------------------------------------------------------------------------------------------------------------------------------------------------------------------------------------------------------------------|------------------------------------------------------------------------------------------------------------------------------------------------------------------------------------------------------------------------------------------------------------------------------------------------------------------------------------------------------------------------------------------------------------------------------------------------------------------------------------------------------------------------------------------------------------------------------------------------------------------------------------------------------------------------------------------------------------------------|
| <p>6. PROTECTIVE ACTION</p> <p>GUIDANCE: What are the specific actions people receiving the message should take?</p> | <ul style="list-style-type: none"> <li>• IF without safe shelter, go to a recommended public shelter by [time]: [info]</li> <li>• PREPARE by getting your essential documents, including: [birth certificate, passports, driver's license, social security card, insurance cards, etc.] and [taking/keeping] them with you</li> <li>• PREPARE for power outages by fully charging your cell phone and backup batteries/external power packs</li> <li>• PREPARE for power outages by testing batteries in radios and flashlights by [time]</li> <li>• PREPARE now by getting essential supplies for you and those in your care, including pets and babies: [food, water, cash, medication, gas, glasses/contacts, hearing aids, pet supplies, pet carriers, baby supplies, etc.] and [take/keep] them with you</li> <li>• SECURE outdoor objects, such as outdoor furniture and trash cans</li> </ul> | <ul style="list-style-type: none"> <li>• AVOID [downed trees, anything that may be touching downed power lines, and debris]</li> <li>• AVOID [glass, windows, outside doors, walls]</li> <li>• AVOID touching metal objects, such as metal fences, railings, and bleachers</li> <li>• COVER your face and head with your arms, a coat, or blanket to avoid injury from flying debris</li> <li>• IF DRIVING, do not park under an overpass</li> <li>• IF OUTSIDE [OR DRIVING], go inside the nearest sturdy building, in a small interior room or on the lowest level</li> <li>• STAY in an interior room of a sturdy building or in the lowest level in the building and wait for an all-clear notification</li> </ul> |
| <p>7. TIME: When should people take protective action? Will the message expire?</p>                                  | <p>NOW; before ## (AM/PM); until ## (AM/PM)</p>                                                                                                                                                                                                                                                                                                                                                                                                                                                                                                                                                                                                                                                                                                                                                                                                                                                      | <p>NOW; before ## (AM/PM); until ## (AM/PM)</p>                                                                                                                                                                                                                                                                                                                                                                                                                                                                                                                                                                                                                                                                        |
| <p>8. ADDITIONAL GUIDANCE: Where should people go for updates?</p>                                                   | <ul style="list-style-type: none"> <li>• CHECK [source] for [updates/information] at [info]</li> </ul>                                                                                                                                                                                                                                                                                                                                                                                                                                                                                                                                                                                                                                                                                                                                                                                               | <ul style="list-style-type: none"> <li>• CHECK [source] for [updates/information] at [info]</li> </ul>                                                                                                                                                                                                                                                                                                                                                                                                                                                                                                                                                                                                                 |

|  |  |  |
|--|--|--|
|  |  |  |
|--|--|--|

### **Pre-event Message Template**

- [Source] TORNADO in [location] possible at ## (AM/PM). Tornadoes contain [dangerous and life-threatening winds, hail, lightning, rain]. Tornadoes can cause power outages, destroy buildings and carry flying debris, causing injury or death. SECURE outdoor objects, such as outdoor furniture and trash cans. IF without safe shelter, go to a recommended public shelter by [time]: [info]. CHECK [source] for [updates/information] at [info].

### **During/Post Event Message Template**

- [Source] A [radar indicated/confirmed on the ground] TORNADO in [location] now. Tornadoes contain [dangerous and life-threatening winds, hail, lightning, rain]. Tornadoes can cause power outages, destroy buildings, and carry flying debris, causing injury or death. STAY in an interior room of a sturdy building or in the lowest level in the building and wait for an all-clear notification. COVER your face and head with your arms, a coat, or blanket to avoid injury from flying debris. CHECK [source] for [updates/information] at [info].

**NOTE: Wireless Emergency Alerts for Tornado (Warning and Emergency) are issued by the National Weather Service. Information provided here should not supplant the guidance provided by your local Weather Forecast Office.**

**TSUNAMI**

| MESSAGE WRITING STEPS                                                                                                                  | PRE-EVENT CONTENT                                                                                                                             | DURING OR POST-EVENT CONTENT                                                                                                                       |
|----------------------------------------------------------------------------------------------------------------------------------------|-----------------------------------------------------------------------------------------------------------------------------------------------|----------------------------------------------------------------------------------------------------------------------------------------------------|
| 1. SOURCE: Which agency should be listed as the source of this message?                                                                | <i>Select a source that is familiar and trusted. Do not use an acronym for the source.</i>                                                    | <i>Select a source that is familiar and trusted. Do not use an acronym for the source.</i>                                                         |
| 2. HAZARD: What type of hazardous event is happening or about to happen?                                                               | TSUNAMI                                                                                                                                       | TSUNAMI                                                                                                                                            |
| 3. HAZARD IMPACTS: What are the consequences of this threat that the public should be aware of or how will it affect them personally?  | TSUNAMI WARNING. Miles long surge of water is now approaching [location]. People who do not evacuate low lying areas could be injured or die. | TSUNAMI WARNING. Miles long surge of water is now approaching [location]. People who do not evacuate low lying areas could be injured or die.      |
| 4. HAZARD LOCATION: Where is the hazardous event occurring? If the hazard is moving, in what direction is it moving or likely to move? | <i>Select well-known landmarks; town/city/county (all or portion); major road(s)/intersection(s).</i>                                         | <i>Select well-known landmarks; town/city/county (all or portion); major road(s)/intersection(s).</i>                                              |
| 5. RESPONSE LOCATION: Is there a specific location that should be evacuated or avoided by people? If so, where should they go?         | <i>Select well-known landmarks; town/city/county (all or portion); major road(s)/intersection(s).</i>                                         | <i>Select well-known landmarks; town/city/county (all or portion); major road(s)/intersection(s).</i>                                              |
| 6. PROTECTIVE ACTION GUIDANCE: What are the specific                                                                                   | <ul style="list-style-type: none"> <li>• DO NOT return to area after evacuation [until/unless]</li> </ul>                                     | <ul style="list-style-type: none"> <li>• DO NOT return to area after evacuation [until/unless] [authorized/directed] by local officials</li> </ul> |

|                                                                              |                                                                                                                                                                                                                                                                                                                                                                                                                                                                                                                                                                                                       |                                                                                                                                                                                                                                                                                                                                                                                                                                                                                                                                                       |
|------------------------------------------------------------------------------|-------------------------------------------------------------------------------------------------------------------------------------------------------------------------------------------------------------------------------------------------------------------------------------------------------------------------------------------------------------------------------------------------------------------------------------------------------------------------------------------------------------------------------------------------------------------------------------------------------|-------------------------------------------------------------------------------------------------------------------------------------------------------------------------------------------------------------------------------------------------------------------------------------------------------------------------------------------------------------------------------------------------------------------------------------------------------------------------------------------------------------------------------------------------------|
| actions people receiving the message should take?                            | <p>[authorized/directed] by local officials</p> <ul style="list-style-type: none"> <li>• DO NOT go toward the coast</li> <li>• DO NOT wait [to see rising water/for natural signs of tsunami]. Get to higher ground NOW.</li> <li>• FOLLOW designated evacuation routes [info]</li> <li>• FOLLOW evacuation orders [info]</li> <li>• IF IN A LOW-LYING AREA, move 100 ft up (or the equivalent of a 10-story building) and at least 1 mile inland.</li> <li>• LEAVE areas near [location]</li> <li>• MOVE inland away from beaches, marinas, harbors, shoreline areas and other water ways</li> </ul> | <ul style="list-style-type: none"> <li>• DO NOT go toward the coast</li> <li>• DO NOT wait [to see rising water/for natural signs of tsunami]. Get to higher ground NOW.</li> <li>• FOLLOW designated evacuation routes [info]</li> <li>• FOLLOW evacuation orders [info]</li> <li>• IF IN A LOW-LYING AREA, move 100 ft up (or the equivalent of a 10-story building) and at least 1 mile inland.</li> <li>• LEAVE areas near [location]</li> <li>• MOVE inland away from beaches, marinas, harbors, shoreline areas and other water ways</li> </ul> |
| 7. TIME: When should people take protective action? Will the message expire? | NOW; before ## (AM/PM); until ## (AM/PM)                                                                                                                                                                                                                                                                                                                                                                                                                                                                                                                                                              | NOW; before ## (AM/PM); until ## (AM/PM)                                                                                                                                                                                                                                                                                                                                                                                                                                                                                                              |
| 8. ADDITIONAL GUIDANCE: Where should people go for updates?                  | <ul style="list-style-type: none"> <li>• CHECK [source] for [updates/information] at [info]</li> </ul>                                                                                                                                                                                                                                                                                                                                                                                                                                                                                                | CHECK [source] for [updates/information] at [info]                                                                                                                                                                                                                                                                                                                                                                                                                                                                                                    |

### Pre-event Message Template

- [Source] TSUNAMI WARNING. Miles long surge of water is approaching [location] at ## (AM/PM). People who do not evacuate low lying areas could be injured or die. DO NOT wait [to see rising water/for natural signs of tsunami]. Get to higher ground NOW. IF IN A LOW-LYING AREA, move 100 ft up (or the equivalent of a 10-story building) and at least 1 mile inland. DO NOT return to area after evacuation [until/unless] [authorized/directed] by local officials

### During/Post Event Message Template

- See Pre-Event Message Template (above)

**NOTE: Wireless Emergency Alerts for Tsunami are issued by the National Weather Service. Information provided here should not supplant the guidance provided by your local Weather Forecast Office.**

**WINTER STORM**

| MESSAGE WRITING STEPS                                                                                                                  | PRE-EVENT CONTENT                                                                                                                                                                                                         | DURING OR POST-EVENT CONTENT                                                                                                                                                                                              |
|----------------------------------------------------------------------------------------------------------------------------------------|---------------------------------------------------------------------------------------------------------------------------------------------------------------------------------------------------------------------------|---------------------------------------------------------------------------------------------------------------------------------------------------------------------------------------------------------------------------|
| 1. SOURCE: Which agency should be listed as the source of this message?                                                                | <i>Select a source that is familiar and trusted. Do not use an acronym for the source.</i>                                                                                                                                | <i>Select a source that is familiar and trusted. Do not use an acronym for the source.</i>                                                                                                                                |
| 2. HAZARD: What type of hazardous event is happening or about to happen?                                                               | WINTER STORM                                                                                                                                                                                                              | WINTER STORM                                                                                                                                                                                                              |
| 3. HAZARD IMPACTS: What are the consequences of this threat that the public should be aware of or how will it affect them personally?  | WINTER STORM in [location] will bring heavy snow, sleet, ice, freezing rain at [time]. Considerable travel problems are [expected/possible] due to unsafe road conditions and traffic delays. Power outages are possible. | WINTER STORM in [location] will bring heavy snow, sleet, ice, freezing rain at [time]. Considerable travel problems are [expected/possible] due to unsafe road conditions and traffic delays. Power outages are possible. |
| 4. HAZARD LOCATION: Where is the hazardous event occurring? If the hazard is moving, in what direction is it moving or likely to move? | <i>Select well-known landmarks; town/city/county (all or portion); major road(s)/intersection(s).</i>                                                                                                                     | <i>Select well-known landmarks; town/city/county (all or portion); major road(s)/intersection(s).</i>                                                                                                                     |
| 5. RESPONSE LOCATION: Is there a specific location that should be evacuated or avoided by people? If so, where should they go?         | <i>Select well-known landmarks; town/city/county (all or portion); major road(s)/intersection(s).</i>                                                                                                                     | <i>Select well-known landmarks; town/city/county (all or portion); major road(s)/intersection(s).</i>                                                                                                                     |

|                                                                                                                   |                                                                                                                                                                                                                                                                                                                                                                                  |                                                                                                                                                                                                                                                                                                                                                                                                                                                                                                                                                             |
|-------------------------------------------------------------------------------------------------------------------|----------------------------------------------------------------------------------------------------------------------------------------------------------------------------------------------------------------------------------------------------------------------------------------------------------------------------------------------------------------------------------|-------------------------------------------------------------------------------------------------------------------------------------------------------------------------------------------------------------------------------------------------------------------------------------------------------------------------------------------------------------------------------------------------------------------------------------------------------------------------------------------------------------------------------------------------------------|
| <p>6. PROTECTIVE ACTION<br/>GUIDANCE: What are the specific actions people receiving the message should take?</p> | <ul style="list-style-type: none"> <li>• PREPARE by having non-perishable food and water on hand by [time]</li> <li>• PREPARE for power outages by fully charging your cell phone and backup batteries/external power packs</li> <li>• PREPARE for power outages by testing batteries in radios and flashlights by [time]</li> <li>• STAY indoors as much as possible</li> </ul> | <ul style="list-style-type: none"> <li>• AVOID travel [until further notice/until [time]]</li> <li>• BRING pets and other animals indoors</li> <li>• DO NOT leave pets and other animals outdoors</li> <li>• IF DRIVING, and you become stranded, hang a distress flag from the antenna or window and stay in your vehicle. Use seat covers and floor mats for insulation or huddle with other passengers.</li> <li>• IF DRIVING, leave extra space between cars</li> <li>• IF DRIVING, reduce speed</li> <li>• STAY indoors as much as possible</li> </ul> |
| <p>7. TIME: When should people take protective action? Will the message expire?</p>                               | <p>NOW; before ## (AM/PM); until ## (AM/PM)</p>                                                                                                                                                                                                                                                                                                                                  | <p>NOW; before ## (AM/PM); until ## (AM/PM)</p>                                                                                                                                                                                                                                                                                                                                                                                                                                                                                                             |
| <p>8. ADDITIONAL GUIDANCE:<br/>Where should people go for updates?</p>                                            | <ul style="list-style-type: none"> <li>• CHECK [source] for [updates/information] at [info]</li> </ul>                                                                                                                                                                                                                                                                           | <ul style="list-style-type: none"> <li>• CHECK [source] for [updates/information] at [info]</li> </ul>                                                                                                                                                                                                                                                                                                                                                                                                                                                      |

#### Pre-event Message Template

- [Source] WINTER STORM expected at ## (AM/PM) in [location] will bring heavy snow, sleet, ice, freezing rain. Considerable travel problems are [expected/possible] due to unsafe road conditions and traffic delays. Power outages are possible. PREPARE by having non-perishable food and water on hand by [time]. CHECK [source] for [updates/information] at [info].

#### During/Post Event Message Template

- [Source] WINTER STORM in [location] until ## (AM/PM) will bring heavy snow, sleet, ice, freezing rain. Considerable travel problems are [expected/possible] due to unsafe road conditions and traffic delays. Power outages are possible. AVOID travel [until further notice/until [time]]. STAY indoors as much as possible.

## TECHNOLOGICAL HAZARDS

### BRIDGE COLLAPSE

| MESSAGE WRITING STEPS                                                                                                                  | PRE-EVENT CONTENT                                                                                     | DURING OR POST-EVENT CONTENT                                                                                                                                     |
|----------------------------------------------------------------------------------------------------------------------------------------|-------------------------------------------------------------------------------------------------------|------------------------------------------------------------------------------------------------------------------------------------------------------------------|
| 1. SOURCE: Which agency should be listed as the source of this message?                                                                | <i>Select a source that is familiar and trusted. Do not use an acronym for the source.</i>            | <i>Select a source that is familiar and trusted. Do not use an acronym for the source.</i>                                                                       |
| 2. HAZARD: What type of hazardous event is happening or about to happen?                                                               | BRIDGE COLLAPSE                                                                                       | BRIDGE COLLAPSE                                                                                                                                                  |
| 3. HAZARD IMPACTS: What are the consequences of this threat that the public should be aware of or how will it affect them personally?  | N/A                                                                                                   | BRIDGE COLLAPSE has occurred in [location], leading to road closures and traffic delays. Fires, debris, and reduced visibility in area [may occur/has occurred]. |
| 4. HAZARD LOCATION: Where is the hazardous event occurring? If the hazard is moving, in what direction is it moving or likely to move? | <i>Select well-known landmarks; town/city/county (all or portion); major road(s)/intersection(s).</i> | <i>Select well-known landmarks; town/city/county (all or portion); major road(s)/intersection(s).</i>                                                            |
| 5. RESPONSE LOCATION: Is there a specific location that should be evacuated or avoided by people? If so, where should they go?         | <i>Select well-known landmarks; town/city/county (all or portion); major road(s)/intersection(s).</i> | <i>Select well-known landmarks; town/city/county (all or portion); major road(s)/intersection(s).</i>                                                            |



|                                                                                                                   |                                          |                                                                                                                                                                                                                                                                                                                                                                                                                                                                                                                                                                            |
|-------------------------------------------------------------------------------------------------------------------|------------------------------------------|----------------------------------------------------------------------------------------------------------------------------------------------------------------------------------------------------------------------------------------------------------------------------------------------------------------------------------------------------------------------------------------------------------------------------------------------------------------------------------------------------------------------------------------------------------------------------|
| <p>6. PROTECTIVE ACTION<br/>GUIDANCE: What are the specific actions people receiving the message should take?</p> | N/A                                      | <ul style="list-style-type: none"> <li>• AVOID [downed trees, anything that may be touching downed power lines, and debris]</li> <li>• AVOID area around [<i>location</i>] until further notice</li> <li>• COVER your nose and mouth with a cloth/mask to protect breathing from [smoke, particles, ash, fumes, etc.] while [evacuating/sheltering/outside/near area]</li> <li>• DO NOT enter [<i>location</i>]</li> <li>• FIND alternate routes</li> <li>• LEAVE areas near [<i>location</i>]</li> <li>• STAY away from [<i>location</i>] until further notice</li> </ul> |
| <p>7. TIME: When should people take protective action? Will the message expire?</p>                               | NOW; before ## (AM/PM); until ## (AM/PM) | NOW; before ## (AM/PM); until ## (AM/PM)                                                                                                                                                                                                                                                                                                                                                                                                                                                                                                                                   |
| <p>8. ADDITIONAL GUIDANCE:<br/>Where should people go for updates?</p>                                            | N/A                                      | <ul style="list-style-type: none"> <li>• CHECK [<i>source</i>] for [updates/information] at [<i>info</i>]</li> </ul>                                                                                                                                                                                                                                                                                                                                                                                                                                                       |

### Pre-event Message Template

- None

### During/Post Event Message Template

- [*Source*] BRIDGE COLLAPSE has occurred at ## (AM/PM) in [*location*], leading to road closures and traffic delays. Fires, debris, and reduced visibility in area [may occur/has occurred]. DO NOT enter [*location*]. FIND alternate routes. CHECK [*source*] for [updates/information] at [*info*].

**BUILDING COLLAPSE**

| MESSAGE WRITING STEPS                                                                                                                  | PRE-EVENT CONTENT                                                                                     | DURING OR POST-EVENT CONTENT                                                                                                                                                                     |
|----------------------------------------------------------------------------------------------------------------------------------------|-------------------------------------------------------------------------------------------------------|--------------------------------------------------------------------------------------------------------------------------------------------------------------------------------------------------|
| 1. SOURCE: Which agency should be listed as the source of this message?                                                                | <i>Select a source that is familiar and trusted. Do not use an acronym for the source.</i>            | <i>Select a source that is familiar and trusted. Do not use an acronym for the source.</i>                                                                                                       |
| 2. HAZARD: What type of hazardous event is happening or about to happen?                                                               | BUILDING COLLAPSE                                                                                     | BUILDING COLLAPSE                                                                                                                                                                                |
| 3. HAZARD IMPACTS: What are the consequences of this threat that the public should be aware of or how will it affect them personally?  | N/A                                                                                                   | BUILDING COLLAPSE has occurred in [location], leading to road closures and traffic delays. Fires, downed power lines, debris, and reduced visibility in immediate area [may occur/has occurred]. |
| 4. HAZARD LOCATION: Where is the hazardous event occurring? If the hazard is moving, in what direction is it moving or likely to move? | <i>Select well-known landmarks; town/city/county (all or portion); major road(s)/intersection(s).</i> | <i>Select well-known landmarks; town/city/county (all or portion); major road(s)/intersection(s).</i>                                                                                            |
| 5. RESPONSE LOCATION: Is there a specific location that should be evacuated or avoided by people? If so, where should they go?         | <i>Select well-known landmarks; town/city/county (all or portion); major road(s)/intersection(s).</i> | <i>Select well-known landmarks; town/city/county (all or portion); major road(s)/intersection(s).</i>                                                                                            |
| 6. PROTECTIVE ACTION GUIDANCE: What are the specific actions people receiving the message should take?                                 | N/A                                                                                                   | <ul style="list-style-type: none"> <li>• AVOID [downed trees, anything that may be touching downed power lines, and debris]</li> </ul>                                                           |

|                                                                              |                                          |                                                                                                                                                                                                                                                                                                                                                                                                                                                                                                                                                                                                                                                                                    |
|------------------------------------------------------------------------------|------------------------------------------|------------------------------------------------------------------------------------------------------------------------------------------------------------------------------------------------------------------------------------------------------------------------------------------------------------------------------------------------------------------------------------------------------------------------------------------------------------------------------------------------------------------------------------------------------------------------------------------------------------------------------------------------------------------------------------|
|                                                                              |                                          | <ul style="list-style-type: none"> <li>• AVOID area around [<i>location</i>] until further notice</li> <li>• CALL or text [<i>phone number</i>] if you or others are [injured/in danger/trapped/buried/have an emergency]</li> <li>• COVER your nose and mouth with a cloth/mask to protect breathing from [smoke, particles, ash, fumes, etc.] while [evacuating/sheltering/outside/near area]</li> <li>• DELAY road travel [due to reduced visibility, due to slick roads, to avoid damage to vehicle, etc.]</li> <li>• DO NOT enter [<i>location</i>]</li> <li>• LEAVE areas near [<i>location</i>]</li> <li>• STAY away from [<i>location</i>] until further notice</li> </ul> |
| 7. TIME: When should people take protective action? Will the message expire? | NOW; before ## (AM/PM); until ## (AM/PM) | NOW; before ## (AM/PM); until ## (AM/PM)                                                                                                                                                                                                                                                                                                                                                                                                                                                                                                                                                                                                                                           |
| 8. ADDITIONAL GUIDANCE: Where should people go for updates?                  | N/A                                      | <ul style="list-style-type: none"> <li>• CHECK [<i>source</i>] for [updates/information] at [<i>info</i>]</li> </ul>                                                                                                                                                                                                                                                                                                                                                                                                                                                                                                                                                               |

### Pre-event Message Template

- None

### During/Post Event Message Template

- [*Source*] BUILDING COLLAPSE has occurred at ## (AM/PM) in [*location*], leading to road closures and traffic delays. Fires, downed power lines, debris, and reduced visibility in immediate area [may occur/has occurred]. LEAVE areas near [*location*]. CALL or text [*phone number*] if you or others are [injured/in danger/trapped/buried/have an emergency].

**BUILDING FIRE**

| MESSAGE WRITING STEPS                                                                                                                  | PRE-EVENT CONTENT                                                                                     | DURING OR POST-EVENT CONTENT                                                                                                                                             |
|----------------------------------------------------------------------------------------------------------------------------------------|-------------------------------------------------------------------------------------------------------|--------------------------------------------------------------------------------------------------------------------------------------------------------------------------|
| 1. SOURCE: Which agency should be listed as the source of this message?                                                                | <i>Select a source that is familiar and trusted. Do not use an acronym for the source.</i>            | <i>Select a source that is familiar and trusted. Do not use an acronym for the source.</i>                                                                               |
| 2. HAZARD: What type of hazardous event is happening or about to happen?                                                               | BUILDING FIRE                                                                                         | BUILDING FIRE                                                                                                                                                            |
| 3. HAZARD IMPACTS: What are the consequences of this threat that the public should be aware of or how will it affect them personally?  | N/A                                                                                                   | BUILDING FIRE has occurred in [location], leading to road closures, traffic delays, and reduced visibility in area. Exposure to smoke is dangerous to health and safety. |
| 4. HAZARD LOCATION: Where is the hazardous event occurring? If the hazard is moving, in what direction is it moving or likely to move? | <i>Select well-known landmarks; town/city/county (all or portion); major road(s)/intersection(s).</i> | <i>Select well-known landmarks; town/city/county (all or portion); major road(s)/intersection(s).</i>                                                                    |
| 5. RESPONSE LOCATION: Is there a specific location that should be evacuated or avoided by people? If so, where should they go?         | <i>Select well-known landmarks; town/city/county (all or portion); major road(s)/intersection(s).</i> | <i>Select well-known landmarks; town/city/county (all or portion); major road(s)/intersection(s).</i>                                                                    |
| 6. PROTECTIVE ACTION GUIDANCE: What are the specific actions people receiving the message should take?                                 | N/A                                                                                                   | <ul style="list-style-type: none"> <li>• AVOID area around [location] until further notice</li> <li>• CLOSE doors and windows</li> </ul>                                 |

|                                                                              |                                          |                                                                                                                                                                                                                                                                                                                                                                                                                                                                                                                                                                                 |
|------------------------------------------------------------------------------|------------------------------------------|---------------------------------------------------------------------------------------------------------------------------------------------------------------------------------------------------------------------------------------------------------------------------------------------------------------------------------------------------------------------------------------------------------------------------------------------------------------------------------------------------------------------------------------------------------------------------------|
|                                                                              |                                          | <ul style="list-style-type: none"> <li>• COVER your nose and mouth with a cloth/mask to protect breathing from [smoke, particles, ash, fumes, etc.] while [evacuating/sheltering/outside/near area]</li> <li>• DO NOT enter [location]</li> <li>• DO NOT return to area after evacuation [until/unless] [authorized/directed] by local officials</li> <li>• LEAVE areas near [location]</li> <li>• STAY away from [location] until further notice</li> <li>• STAY indoors until further notice</li> <li>• TURN OFF all fans and heating and air conditioning systems</li> </ul> |
| 7. TIME: When should people take protective action? Will the message expire? | NOW; before ## (AM/PM); until ## (AM/PM) | NOW; before ## (AM/PM); until ## (AM/PM)                                                                                                                                                                                                                                                                                                                                                                                                                                                                                                                                        |
| 8. ADDITIONAL GUIDANCE: Where should people go for updates?                  | N/A                                      | <ul style="list-style-type: none"> <li>• CHECK [source] for [updates/information] at [info]</li> </ul>                                                                                                                                                                                                                                                                                                                                                                                                                                                                          |

### Pre-event Message Template

- None

### During/Post Event Message Template

- [Source] BUILDING FIRE has occurred at ## (AM/PM) in [location], leading to road closures, traffic delays, and reduced visibility in area. Exposure to smoke is dangerous to health and safety. STAY indoors until further notice. TURN OFF all fans and heating and air conditioning systems until ## (AM/PM).

**CHEMICAL RELEASE**

| MESSAGE WRITING STEPS                                                                                                                  | PRE-EVENT CONTENT                                                                                     | DURING OR POST-EVENT CONTENT                                                                                                                                                                            |
|----------------------------------------------------------------------------------------------------------------------------------------|-------------------------------------------------------------------------------------------------------|---------------------------------------------------------------------------------------------------------------------------------------------------------------------------------------------------------|
| 1. SOURCE: Which agency should be listed as the source of this message?                                                                | <i>Select a source that is familiar and trusted. Do not use an acronym for the source.</i>            | <i>Select a source that is familiar and trusted. Do not use an acronym for the source.</i>                                                                                                              |
| 2. HAZARD: What type of hazardous event is happening or about to happen?                                                               | CHEMICAL RELEASE                                                                                      | CHEMICAL RELEASE                                                                                                                                                                                        |
| 3. HAZARD IMPACTS: What are the consequences of this threat that the public should be aware of or how will it affect them personally?  | N/A                                                                                                   | A CHEMICAL RELEASE has occurred in [location]. Exposure may cause difficulty breathing, loss of coordination, burning sensation in eyes/nose/throat/lungs, nausea, and possibly death.                  |
| 4. HAZARD LOCATION: Where is the hazardous event occurring? If the hazard is moving, in what direction is it moving or likely to move? | <i>Select well-known landmarks; town/city/county (all or portion); major road(s)/intersection(s).</i> | <i>Select well-known landmarks; town/city/county (all or portion); major road(s)/intersection(s).</i>                                                                                                   |
| 5. RESPONSE LOCATION: Is there a specific location that should be evacuated or avoided by people? If so, where should they go?         | <i>Select well-known landmarks; town/city/county (all or portion); major road(s)/intersection(s).</i> | <i>Select well-known landmarks; town/city/county (all or portion); major road(s)/intersection(s).</i>                                                                                                   |
| 6. PROTECTIVE ACTION GUIDANCE: What are the specific actions people receiving the message should take?                                 | N/A                                                                                                   | <ul style="list-style-type: none"> <li>• AVOID area around [location] until further notice</li> <li>• BRING pets and other animals indoors</li> <li>• CLOSE air conditioner fresh-air intake</li> </ul> |

|                                                                              |                                          |                                                                                                                                                                                                                                                                                                                                                                                                                                                                                                                                                                                                                                                                                                                                                                                                                                                                                                                                                                                                                                                                                                                                          |
|------------------------------------------------------------------------------|------------------------------------------|------------------------------------------------------------------------------------------------------------------------------------------------------------------------------------------------------------------------------------------------------------------------------------------------------------------------------------------------------------------------------------------------------------------------------------------------------------------------------------------------------------------------------------------------------------------------------------------------------------------------------------------------------------------------------------------------------------------------------------------------------------------------------------------------------------------------------------------------------------------------------------------------------------------------------------------------------------------------------------------------------------------------------------------------------------------------------------------------------------------------------------------|
|                                                                              |                                          | <ul style="list-style-type: none"> <li>• CLOSE doors and windows</li> <li>• CLOSE fireplace dampers</li> <li>• CONTACT [<i>source</i>] to report [information/exposure/suspicious activity/suspect, etc.] at [<i>contact info</i>]</li> <li>• DO NOT enter [<i>location</i>]</li> <li>• DO NOT return to area after evacuation [until/unless] [authorized/directed] by local officials</li> <li>• FOLLOW evacuation orders [<i>info</i>]</li> <li>• FOLLOW instructions from [<i>source</i>]</li> <li>• IF [HURT, SICK], and need emergency care, call 911</li> <li>• IF DRIVING to evacuate area, keep car windows and vents closed</li> <li>• IF OUTSIDE [OR DRIVING], go inside the nearest building</li> <li>• LEAVE areas near [<i>location</i>]</li> <li>• REPORT [gas leak, exposure to [hazard]] to [<i>source</i>] to receive instructions [<i>contact info</i>]</li> <li>• SEAL any gaps/openings with tape to keep bad air out</li> <li>• STAY away from [<i>location</i>] until further notice</li> <li>• STAY indoors until further notice</li> <li>• TURN OFF all fans and heating and air conditioning systems</li> </ul> |
| 7. TIME: When should people take protective action? Will the message expire? | NOW; before ## (AM/PM); until ## (AM/PM) | NOW; before ## (AM/PM); until ## (AM/PM)                                                                                                                                                                                                                                                                                                                                                                                                                                                                                                                                                                                                                                                                                                                                                                                                                                                                                                                                                                                                                                                                                                 |



|                                                                |     |                                                                                                      |
|----------------------------------------------------------------|-----|------------------------------------------------------------------------------------------------------|
| 8. ADDITIONAL GUIDANCE:<br>Where should people go for updates? | N/A | <ul style="list-style-type: none"> <li>CHECK [source] for [updates/information] at [info]</li> </ul> |
|----------------------------------------------------------------|-----|------------------------------------------------------------------------------------------------------|

### Pre-event Message Template

- None

### During/Post Event Message Template

- [Source] A CHEMICAL RELEASE has occurred at ## (AM/PM) in [location]. Exposure may cause difficulty breathing, loss of coordination, burning sensation in eyes/nose/throat/lungs, nausea, and possibly death. STAY indoors until further notice. IF [OUTSIDE/DRIVING], go inside the nearest building. TURN OFF all fans and heating and air conditioning systems.

**DAM/LEVEE FAILURE**

| MESSAGE WRITING STEPS                                                                                                                  | PRE-EVENT CONTENT                                                                                                                                   | DURING OR POST-EVENT CONTENT                                                                                                               |
|----------------------------------------------------------------------------------------------------------------------------------------|-----------------------------------------------------------------------------------------------------------------------------------------------------|--------------------------------------------------------------------------------------------------------------------------------------------|
| 1. SOURCE: Which agency should be listed as the source of this message?                                                                | <i>Select a source that is familiar and trusted. Do not use an acronym for the source.</i>                                                          | <i>Select a source that is familiar and trusted. Do not use an acronym for the source.</i>                                                 |
| 2. HAZARD: What type of hazardous event is happening or about to happen?                                                               | DAM/LEVEE FAILURE                                                                                                                                   | DAM/LEVEE FAILURE                                                                                                                          |
| 3. HAZARD IMPACTS: What are the consequences of this threat that the public should be aware of or how will it affect them personally?  | [DAM/LEVEE] FAILURE in [location] possible. Potential for life threatening flooding to occur and catastrophic amounts of fast moving [surge/water]. | [DAM/LEVEE] FAILURE in [location]. Potential for life threatening flooding to occur and catastrophic amounts of fast moving [surge/water]. |
| 4. HAZARD LOCATION: Where is the hazardous event occurring? If the hazard is moving, in what direction is it moving or likely to move? | <i>Select well-known landmarks; town/city/county (all or portion); major road(s)/intersection(s).</i>                                               | <i>Select well-known landmarks; town/city/county (all or portion); major road(s)/intersection(s).</i>                                      |
| 5. RESPONSE LOCATION: Is there a specific location that should be evacuated or avoided by people? If so, where should they go?         | <i>Select well-known landmarks; town/city/county (all or portion); major road(s)/intersection(s).</i>                                               | <i>Select well-known landmarks; town/city/county (all or portion); major road(s)/intersection(s).</i>                                      |
| 6. PROTECTIVE ACTION GUIDANCE: What are the specific actions people receiving the message should take?                                 | <ul style="list-style-type: none"> <li>• AVOID area around [location] until further notice</li> <li>• AVOID rising water</li> </ul>                 | <ul style="list-style-type: none"> <li>• AVOID [downed trees, anything that may be touching downed power lines, and debris]</li> </ul>     |

|                                                                              |                                                                                                                                                                                                                                                                                                                                                                                                                   |                                                                                                                                                                                                                                                                                                                                                                                                                                                                                                                                                                                                                                                                          |
|------------------------------------------------------------------------------|-------------------------------------------------------------------------------------------------------------------------------------------------------------------------------------------------------------------------------------------------------------------------------------------------------------------------------------------------------------------------------------------------------------------|--------------------------------------------------------------------------------------------------------------------------------------------------------------------------------------------------------------------------------------------------------------------------------------------------------------------------------------------------------------------------------------------------------------------------------------------------------------------------------------------------------------------------------------------------------------------------------------------------------------------------------------------------------------------------|
|                                                                              | <ul style="list-style-type: none"> <li>• BE READY to [evacuate/leave] [location] when advised by local officials</li> <li>• DO NOT enter [location]</li> <li>• FOLLOW evacuation orders [info]</li> <li>• FOLLOW instructions from [source]</li> <li>• LEAVE areas near [location]</li> <li>• MOVE to higher ground [immediately, by [time]]</li> <li>• STAY away from [location] until further notice</li> </ul> | <ul style="list-style-type: none"> <li>• AVOID area around [location] until further notice</li> <li>• AVOID rising water</li> <li>• DO NOT walk or drive through moving water or on flooded roadways</li> <li>• DO NOT enter [location]</li> <li>• FOLLOW evacuation orders [info]</li> <li>• FOLLOW instructions from [source]</li> <li>• LEAVE areas near [location]</li> <li>• MOVE to higher ground [immediately, by [time]]</li> <li>• IF TRAPPED, go to the highest level of your home/building, including the roof. Do not climb into a closed attic. You may be unable to escape</li> <li>• STAY away from [location] until further notice</li> <li>•</li> </ul> |
| 7. TIME: When should people take protective action? Will the message expire? | NOW; before ## (AM/PM); until ## (AM/PM)                                                                                                                                                                                                                                                                                                                                                                          | NOW; before ## (AM/PM); until ## (AM/PM)                                                                                                                                                                                                                                                                                                                                                                                                                                                                                                                                                                                                                                 |
| 8. ADDITIONAL GUIDANCE: Where should people go for updates?                  | <ul style="list-style-type: none"> <li>• CHECK [source] for [updates/information] at [info]</li> </ul>                                                                                                                                                                                                                                                                                                            | <ul style="list-style-type: none"> <li>• CHECK [source] for [updates/information] at [info]</li> </ul>                                                                                                                                                                                                                                                                                                                                                                                                                                                                                                                                                                   |

### Pre-event Message Template

- [Source] [DAM/LEVEE] FAILURE in [location] possible. Potential for life threatening flooding to occur and catastrophic amounts of fast moving [surge/water]. AVOID area around [location] until further notice. BE READY to [evacuate/leave] [location] when advised by local officials.

**During/Post Event Message Template**

- [Source] [DAM/LEVEE] FAILURE in [location] at ## (AM/PM). Potential for life threatening flooding to occur and catastrophic amounts of fast moving [surge/water]. LEAVE areas near [location]. MOVE to higher ground [immediately, by time]. FOLLOW evacuation orders [info]. STAY away from [location] until further notice.

**EXPLOSION**

| MESSAGE WRITING STEPS                                                                                                                  | PRE-EVENT CONTENT                                                                                     | DURING OR POST-EVENT CONTENT                                                                                                                                                                                          |
|----------------------------------------------------------------------------------------------------------------------------------------|-------------------------------------------------------------------------------------------------------|-----------------------------------------------------------------------------------------------------------------------------------------------------------------------------------------------------------------------|
| 1. SOURCE: Which agency should be listed as the source of this message?                                                                | <i>Select a source that is familiar and trusted. Do not use an acronym for the source.</i>            | <i>Select a source that is familiar and trusted. Do not use an acronym for the source.</i>                                                                                                                            |
| 2. HAZARD: What type of hazardous event is happening or about to happen?                                                               | EXPLOSION                                                                                             | EXPLOSION                                                                                                                                                                                                             |
| 3. HAZARD IMPACTS: What are the consequences of this threat that the public should be aware of or how will it affect them personally?  | N/A                                                                                                   | An EXPLOSION has occurred in [ <i>location</i> ], leading to road closures, traffic delays, and reduced visibility in area. Fires, downed power lines, and debris in immediate area [ <i>possible/has occurred</i> ]. |
| 4. HAZARD LOCATION: Where is the hazardous event occurring? If the hazard is moving, in what direction is it moving or likely to move? | <i>Select well-known landmarks; town/city/county (all or portion); major road(s)/intersection(s).</i> | <i>Select well-known landmarks; town/city/county (all or portion); major road(s)/intersection(s).</i>                                                                                                                 |
| 5. RESPONSE LOCATION: Is there a specific location that should be evacuated or avoided by people? If so, where should they go?         | <i>Select well-known landmarks; town/city/county (all or portion); major road(s)/intersection(s).</i> | <i>Select well-known landmarks; town/city/county (all or portion); major road(s)/intersection(s).</i>                                                                                                                 |
| 6. PROTECTIVE ACTION GUIDANCE: What are the specific actions people receiving the message should take?                                 | N/A                                                                                                   | <ul style="list-style-type: none"> <li>• AVOID [downed trees, anything that may be touching downed power lines, and debris]</li> </ul>                                                                                |

|  |  |                                                                                                                                                                                                                                                                                                                                                                                                                                                                                                                                                                                                                                                                                                                                                                                                                                                                                                                                                                                                                                                                                                                                                                                                                                |
|--|--|--------------------------------------------------------------------------------------------------------------------------------------------------------------------------------------------------------------------------------------------------------------------------------------------------------------------------------------------------------------------------------------------------------------------------------------------------------------------------------------------------------------------------------------------------------------------------------------------------------------------------------------------------------------------------------------------------------------------------------------------------------------------------------------------------------------------------------------------------------------------------------------------------------------------------------------------------------------------------------------------------------------------------------------------------------------------------------------------------------------------------------------------------------------------------------------------------------------------------------|
|  |  | <ul style="list-style-type: none"><li>• AVOID area around [<i>location</i>] until further notice</li><li>• CALL or text [<i>phone number</i>] if you or others are [injured/in danger/trapped/buried/have an emergency]</li><li>• CHECK for and report gas leaks when returning to area [<i>contact info</i>]</li><li>• COVER your nose and mouth with a cloth/mask to protect breathing from [smoke, particles, ash, fumes, etc.] while [evacuating/sheltering/outside/near area]</li><li>• DO NOT enter [<i>location</i>]</li><li>• DO NOT return to area after evacuation [until/unless] [authorized/directed] by local officials</li><li>• FOLLOW evacuation orders [<i>info</i>]</li><li>• FOLLOW instructions from [<i>source</i>]</li><li>• IF [HURT, SICK], get medical attention at [nearest hospital, etc.] [immediately, once situation is all clear, etc.]</li><li>• LEAVE areas near [<i>location</i>]</li><li>• LOOK around and extinguish small fires in your immediate area [<i>info</i>]</li><li>• STAY away from [<i>location</i>] until further notice</li><li>• STAY indoors until further notice</li><li>• WAIT for [further instructions/updates/more <i>information</i>] from [<i>source</i>]</li></ul> |
|--|--|--------------------------------------------------------------------------------------------------------------------------------------------------------------------------------------------------------------------------------------------------------------------------------------------------------------------------------------------------------------------------------------------------------------------------------------------------------------------------------------------------------------------------------------------------------------------------------------------------------------------------------------------------------------------------------------------------------------------------------------------------------------------------------------------------------------------------------------------------------------------------------------------------------------------------------------------------------------------------------------------------------------------------------------------------------------------------------------------------------------------------------------------------------------------------------------------------------------------------------|

|                                                                              |                                          |                                                                                                                   |
|------------------------------------------------------------------------------|------------------------------------------|-------------------------------------------------------------------------------------------------------------------|
| 7. TIME: When should people take protective action? Will the message expire? | NOW; before ## (AM/PM); until ## (AM/PM) | NOW; before ## (AM/PM); until ## (AM/PM)                                                                          |
| 8. ADDITIONAL GUIDANCE: Where should people go for updates?                  | N/A                                      | <ul style="list-style-type: none"> <li>• CHECK [source] for [updates/information] at [info]</li> <li>•</li> </ul> |

### Pre-event Message Template

- None

### During/Post Event Message Template

- [Source] An EXPLOSION has occurred at ## (AM/PM) in [location], leading to road closures, traffic delays, and reduced visibility in area. Fires, downed power lines, and debris in immediate area [possible/has occurred]. AVOID area around [location] until further notice. CALL or text [phone number] if you or others are [injured/in danger/trapped/buried/have an emergency].

**HAZARDOUS MATERIALS RELEASE**

| MESSAGE WRITING STEPS                                                                                                                  | PRE-EVENT CONTENT                                                                                     | DURING OR POST-EVENT CONTENT                                                                                                                                                                                   |
|----------------------------------------------------------------------------------------------------------------------------------------|-------------------------------------------------------------------------------------------------------|----------------------------------------------------------------------------------------------------------------------------------------------------------------------------------------------------------------|
| 1. SOURCE: Which agency should be listed as the source of this message?                                                                | <i>Select a source that is familiar and trusted. Do not use an acronym for the source.</i>            | <i>Select a source that is familiar and trusted. Do not use an acronym for the source.</i>                                                                                                                     |
| 2. HAZARD: What type of hazardous event is happening or about to happen?                                                               | HAZARDOUS MATERIALS RELEASE                                                                           | HAZARDOUS MATERIALS RELEASE                                                                                                                                                                                    |
| 3. HAZARD IMPACTS: What are the consequences of this threat that the public should be aware of or how will it affect them personally?  | N/A                                                                                                   | A HAZARDOUS MATERIALS release has occurred in [ <i>location</i> ]. Exposure may cause difficulty breathing, loss of coordination, burning sensation in eyes/nose/throat/lungs, nausea, and possibly death.     |
| 4. HAZARD LOCATION: Where is the hazardous event occurring? If the hazard is moving, in what direction is it moving or likely to move? | <i>Select well-known landmarks; town/city/county (all or portion); major road(s)/intersection(s).</i> | <i>Select well-known landmarks; town/city/county (all or portion); major road(s)/intersection(s).</i>                                                                                                          |
| 5. RESPONSE LOCATION: Is there a specific location that should be evacuated or avoided by people? If so, where should they go?         | <i>Select well-known landmarks; town/city/county (all or portion); major road(s)/intersection(s).</i> | <i>Select well-known landmarks; town/city/county (all or portion); major road(s)/intersection(s).</i>                                                                                                          |
| 6. PROTECTIVE ACTION GUIDANCE: What are the specific actions people receiving the message should take?                                 | N/A                                                                                                   | <ul style="list-style-type: none"> <li>• AVOID area around [<i>location</i>] until further notice</li> <li>• BRING pets and other animals indoors</li> <li>• CLOSE air conditioner fresh-air intake</li> </ul> |



|                                                                              |                                          |                                                                                                                                                                                                                                                                                                                                                                                                                                                                                                                                                                                                                                                                                                                                                                                                                                                                                                                                                                                                                                                                                                                                          |
|------------------------------------------------------------------------------|------------------------------------------|------------------------------------------------------------------------------------------------------------------------------------------------------------------------------------------------------------------------------------------------------------------------------------------------------------------------------------------------------------------------------------------------------------------------------------------------------------------------------------------------------------------------------------------------------------------------------------------------------------------------------------------------------------------------------------------------------------------------------------------------------------------------------------------------------------------------------------------------------------------------------------------------------------------------------------------------------------------------------------------------------------------------------------------------------------------------------------------------------------------------------------------|
|                                                                              |                                          | <ul style="list-style-type: none"> <li>• CLOSE doors and windows</li> <li>• CLOSE fireplace dampers</li> <li>• CONTACT [<i>source</i>] to report [information/exposure/suspicious activity/suspect, etc.] at [<i>contact info</i>]</li> <li>• DO NOT enter [<i>location</i>]</li> <li>• DO NOT return to area after evacuation [until/unless] [authorized/directed] by local officials</li> <li>• FOLLOW evacuation orders [<i>info</i>]</li> <li>• FOLLOW instructions from [<i>source</i>]</li> <li>• IF [HURT, SICK], and need emergency care, call 911</li> <li>• IF DRIVING to evacuate area, keep car windows and vents closed</li> <li>• IF OUTSIDE [OR DRIVING], go inside the nearest building</li> <li>• LEAVE areas near [<i>location</i>]</li> <li>• REPORT [gas leak, exposure to [hazard]] to [<i>source</i>] to receive instructions [<i>contact info</i>]</li> <li>• SEAL any gaps/openings with tape to keep bad air out</li> <li>• STAY away from [<i>location</i>] until further notice</li> <li>• STAY indoors until further notice</li> <li>• TURN OFF all fans and heating and air conditioning systems</li> </ul> |
| 7. TIME: When should people take protective action? Will the message expire? | NOW; before ## (AM/PM); until ## (AM/PM) | NOW; before ## (AM/PM); until ## (AM/PM)                                                                                                                                                                                                                                                                                                                                                                                                                                                                                                                                                                                                                                                                                                                                                                                                                                                                                                                                                                                                                                                                                                 |

|                                                                |     |                                                                                                      |
|----------------------------------------------------------------|-----|------------------------------------------------------------------------------------------------------|
| 8. ADDITIONAL GUIDANCE:<br>Where should people go for updates? | N/A | <ul style="list-style-type: none"> <li>CHECK [source] for [updates/information] at [info]</li> </ul> |
|----------------------------------------------------------------|-----|------------------------------------------------------------------------------------------------------|

### Pre-event Message Template

- None

### During/Post Event Message Template

- [Source] A HAZARDOUS MATERIALS release has occurred at ## (AM/PM) in [location]. Exposure may cause difficulty breathing, loss of coordination, burning sensation in eyes/nose/throat/lungs, nausea, and possibly death. LEAVE areas near [location]. IF DRIVING to evacuate area, keep car windows and vents closed. DO NOT return to area after evacuation [until/unless] [authorized/directed] by local officials. CHECK [source] for [updates/information] at [info].

**INDUSTRIAL PLANT FIRE**

| MESSAGE WRITING STEPS                                                                                                                  | PRE-EVENT CONTENT                                                                                     | DURING OR POST-EVENT CONTENT                                                                                                                                                                                                                         |
|----------------------------------------------------------------------------------------------------------------------------------------|-------------------------------------------------------------------------------------------------------|------------------------------------------------------------------------------------------------------------------------------------------------------------------------------------------------------------------------------------------------------|
| 1. SOURCE: Which agency should be listed as the source of this message?                                                                | <i>Select a source that is familiar and trusted. Do not use an acronym for the source.</i>            | <i>Select a source that is familiar and trusted. Do not use an acronym for the source.</i>                                                                                                                                                           |
| 2. HAZARD: What type of hazardous event is happening or about to happen?                                                               | INDUSTRIAL PLANT FIRE                                                                                 | INDUSTRIAL PLANT FIRE                                                                                                                                                                                                                                |
| 3. HAZARD IMPACTS: What are the consequences of this threat that the public should be aware of or how will it affect them personally?  | N/A                                                                                                   | INDUSTRIAL PLANT FIRE [with potential release of toxic fumes] has occurred in [location]. Exposure to chemicals/fumes may cause difficulty breathing, loss of coordination, burning sensation in eyes/nose/throat/lungs, nausea, and possibly death. |
| 4. HAZARD LOCATION: Where is the hazardous event occurring? If the hazard is moving, in what direction is it moving or likely to move? | <i>Select well-known landmarks; town/city/county (all or portion); major road(s)/intersection(s).</i> | <i>Select well-known landmarks; town/city/county (all or portion); major road(s)/intersection(s).</i>                                                                                                                                                |
| 5. RESPONSE LOCATION: Is there a specific location that should be evacuated or avoided by people? If so, where should they go?         | <i>Select well-known landmarks; town/city/county (all or portion); major road(s)/intersection(s).</i> | <i>Select well-known landmarks; town/city/county (all or portion); major road(s)/intersection(s).</i>                                                                                                                                                |
| 6. PROTECTIVE ACTION GUIDANCE: What are the specific                                                                                   | N/A                                                                                                   | <ul style="list-style-type: none"> <li>• AVOID area around [location] until further notice</li> </ul>                                                                                                                                                |

|                                                          |  |                                                                                                                                                                                                                                                                                                                                                                                                                                                                                                                                                                                                                                                                                                                                                                                                                                                                                                                                                                                                                                                                                                                                                                                                                                            |
|----------------------------------------------------------|--|--------------------------------------------------------------------------------------------------------------------------------------------------------------------------------------------------------------------------------------------------------------------------------------------------------------------------------------------------------------------------------------------------------------------------------------------------------------------------------------------------------------------------------------------------------------------------------------------------------------------------------------------------------------------------------------------------------------------------------------------------------------------------------------------------------------------------------------------------------------------------------------------------------------------------------------------------------------------------------------------------------------------------------------------------------------------------------------------------------------------------------------------------------------------------------------------------------------------------------------------|
| <p>actions people receiving the message should take?</p> |  | <ul style="list-style-type: none"> <li>• BRING pets and other animals indoors</li> <li>• CLOSE air conditioner fresh-air intake</li> <li>• CLOSE doors and windows</li> <li>• CLOSE fireplace dampers</li> <li>• CONTACT [<i>source</i>] to report [information/exposure/suspicious activity/suspect, etc.] at [<i>contact info</i>]</li> <li>• DO NOT enter [<i>location</i>]</li> <li>• DO NOT return to area after evacuation [until/unless] [authorized/directed] by local officials</li> <li>• FOLLOW evacuation orders [<i>info</i>]</li> <li>• FOLLOW instructions from [<i>source</i>]</li> <li>• IF [HURT, SICK], and need emergency care, call 911</li> <li>• IF DRIVING to evacuate area, keep car windows and vents closed</li> <li>• IF OUTSIDE [OR DRIVING], go inside the nearest building</li> <li>• LEAVE areas near [<i>location</i>]</li> <li>• REPORT [gas leak, exposure to [hazard]] to [<i>source</i>] to receive instructions [<i>contact info</i>]</li> <li>• SEAL any gaps/openings with tape to keep bad air out</li> <li>• STAY away from [<i>location</i>] until further notice</li> <li>• STAY indoors until further notice</li> <li>• TURN OFF all fans and heating and air conditioning systems</li> </ul> |
|----------------------------------------------------------|--|--------------------------------------------------------------------------------------------------------------------------------------------------------------------------------------------------------------------------------------------------------------------------------------------------------------------------------------------------------------------------------------------------------------------------------------------------------------------------------------------------------------------------------------------------------------------------------------------------------------------------------------------------------------------------------------------------------------------------------------------------------------------------------------------------------------------------------------------------------------------------------------------------------------------------------------------------------------------------------------------------------------------------------------------------------------------------------------------------------------------------------------------------------------------------------------------------------------------------------------------|

|                                                                              |                                          |                                                                                                      |
|------------------------------------------------------------------------------|------------------------------------------|------------------------------------------------------------------------------------------------------|
| 7. TIME: When should people take protective action? Will the message expire? | NOW; before ## (AM/PM); until ## (AM/PM) | NOW; before ## (AM/PM); until ## (AM/PM)                                                             |
| 8. ADDITIONAL GUIDANCE: Where should people go for updates?                  | N/A                                      | <ul style="list-style-type: none"> <li>CHECK [source] for [updates/information] at [info]</li> </ul> |

### Pre-event Message Template

- None

### During/Post Event Message Template

- [Source] INDUSTRIAL PLANT FIRE [with potential release of toxic fumes] has occurred at ## (AM/PM) in [location]. Exposure to chemicals/fumes may cause difficulty breathing, loss of coordination, burning sensation in eyes/nose/throat/lungs, nausea, and possibly death. LEAVE areas near [location]. IF DRIVING to evacuate area, keep car windows and vents closed. FOLLOW instructions from [source].

**RADIOLOGICAL RELEASE/ACCIDENT**

| MESSAGE WRITING STEPS                                                                                                                  | PRE-EVENT CONTENT                                                                                     | DURING OR POST-EVENT CONTENT                                                                                                                                                               |
|----------------------------------------------------------------------------------------------------------------------------------------|-------------------------------------------------------------------------------------------------------|--------------------------------------------------------------------------------------------------------------------------------------------------------------------------------------------|
| 1. SOURCE: Which agency should be listed as the source of this message?                                                                | <i>Select a source that is familiar and trusted. Do not use an acronym for the source.</i>            | <i>Select a source that is familiar and trusted. Do not use an acronym for the source.</i>                                                                                                 |
| 2. HAZARD: What type of hazardous event is happening or about to happen?                                                               | RADIOLOGICAL RELEASE/ACCIDENT                                                                         | RADIOLOGICAL RELEASE/ACCIDENT                                                                                                                                                              |
| 3. HAZARD IMPACTS: What are the consequences of this threat that the public should be aware of or how will it affect them personally?  | N/A                                                                                                   | A RADIOLOGICAL [release/accident] has occurred in [location]. Exposure to even small levels of radiation can be dangerous to health and safety.                                            |
| 4. HAZARD LOCATION: Where is the hazardous event occurring? If the hazard is moving, in what direction is it moving or likely to move? | <i>Select well-known landmarks; town/city/county (all or portion); major road(s)/intersection(s).</i> | <i>Select well-known landmarks; town/city/county (all or portion); major road(s)/intersection(s).</i>                                                                                      |
| 5. RESPONSE LOCATION: Is there a specific location that should be evacuated or avoided by people? If so, where should they go?         | <i>Select well-known landmarks; town/city/county (all or portion); major road(s)/intersection(s).</i> | <i>Select well-known landmarks; town/city/county (all or portion); major road(s)/intersection(s).</i>                                                                                      |
| 6. PROTECTIVE ACTION GUIDANCE: What are the specific actions people receiving the message should take?                                 | N/A                                                                                                   | <ul style="list-style-type: none"> <li>• AVOID area around [location] until further notice</li> <li>• CLOSE air conditioner fresh-air intake</li> <li>• CLOSE doors and windows</li> </ul> |

|                                                                              |                                          |                                                                                                                                                                                                                                                                                                                                                                                                                                                                                                                                                                                                                                                                                                                                                                                |
|------------------------------------------------------------------------------|------------------------------------------|--------------------------------------------------------------------------------------------------------------------------------------------------------------------------------------------------------------------------------------------------------------------------------------------------------------------------------------------------------------------------------------------------------------------------------------------------------------------------------------------------------------------------------------------------------------------------------------------------------------------------------------------------------------------------------------------------------------------------------------------------------------------------------|
|                                                                              |                                          | <ul style="list-style-type: none"> <li>• CLOSE fireplace dampers</li> <li>• COVER your nose and mouth with a cloth/mask to protect breathing from [smoke, particles, ash, fumes, etc.] while [evacuating/sheltering/outside/near area]</li> <li>• DO NOT enter [location]</li> <li>• FOLLOW instructions from [source]</li> <li>• IF DRIVING to evacuate area, keep car windows and vents closed</li> <li>• IF OUTSIDE [OR DRIVING], go inside the nearest building</li> <li>• LEAVE areas near [location]</li> <li>• SEAL any gaps/openings with tape to keep bad air out</li> <li>• STAY away from [location] until further notice</li> <li>• STAY indoors until further notice</li> <li>• WAIT for [further instructions/updates/more information] from [source]</li> </ul> |
| 7. TIME: When should people take protective action? Will the message expire? | NOW; before ## (AM/PM); until ## (AM/PM) | NOW; before ## (AM/PM); until ## (AM/PM)                                                                                                                                                                                                                                                                                                                                                                                                                                                                                                                                                                                                                                                                                                                                       |
| 8. ADDITIONAL GUIDANCE: Where should people go for updates?                  | N/A                                      | <ul style="list-style-type: none"> <li>• CHECK [source] for [updates/information] at [info]</li> </ul>                                                                                                                                                                                                                                                                                                                                                                                                                                                                                                                                                                                                                                                                         |

### Pre-event Message Template

- None

**During/Post Event Message Template**

- [Source] A RADIOLOGICAL [release/accident] has occurred at ## (AM/PM) in [location]. Exposure to even small levels of radiation can be dangerous to health and safety. STAY indoors until further notice. SEAL any gaps/openings with tape to keep bad air out. CHECK [source] for [updates/information] at [info]



**TOXIC FUMES**

| MESSAGE WRITING STEPS                                                                                                                  | PRE-EVENT CONTENT                                                                                     | DURING OR POST-EVENT CONTENT                                                                                                                                                                                   |
|----------------------------------------------------------------------------------------------------------------------------------------|-------------------------------------------------------------------------------------------------------|----------------------------------------------------------------------------------------------------------------------------------------------------------------------------------------------------------------|
| 1. SOURCE: Which agency should be listed as the source of this message?                                                                | <i>Select a source that is familiar and trusted. Do not use an acronym for the source.</i>            | <i>Select a source that is familiar and trusted. Do not use an acronym for the source.</i>                                                                                                                     |
| 2. HAZARD: What type of hazardous event is happening or about to happen?                                                               | TOXIC FUMES                                                                                           | TOXIC FUMES                                                                                                                                                                                                    |
| 3. HAZARD IMPACTS: What are the consequences of this threat that the public should be aware of or how will it affect them personally?  | N/A                                                                                                   | TOXIC FUMES released in [ <i>location</i> ]. Exposure to chemicals/fumes may cause difficulty breathing, loss of coordination, burning sensation in eyes/nose/throat/lungs, nausea, and possibly death.        |
| 4. HAZARD LOCATION: Where is the hazardous event occurring? If the hazard is moving, in what direction is it moving or likely to move? | <i>Select well-known landmarks; town/city/county (all or portion); major road(s)/intersection(s).</i> | <i>Select well-known landmarks; town/city/county (all or portion); major road(s)/intersection(s).</i>                                                                                                          |
| 5. RESPONSE LOCATION: Is there a specific location that should be evacuated or avoided by people? If so, where should they go?         | <i>Select well-known landmarks; town/city/county (all or portion); major road(s)/intersection(s).</i> | <i>Select well-known landmarks; town/city/county (all or portion); major road(s)/intersection(s).</i>                                                                                                          |
| 6. PROTECTIVE ACTION GUIDANCE: What are the specific actions people receiving the message should take?                                 | N/A                                                                                                   | <ul style="list-style-type: none"> <li>• AVOID area around [<i>location</i>] until further notice</li> <li>• BRING pets and other animals indoors</li> <li>• CLOSE air conditioner fresh-air intake</li> </ul> |

|                                                                              |                                          |                                                                                                                                                                                                                                                                                                                                                                                                                                                                                                                                                                                                                                                                                                                                                                                                                                                                                                                                                                                                                                                                                                                                         |
|------------------------------------------------------------------------------|------------------------------------------|-----------------------------------------------------------------------------------------------------------------------------------------------------------------------------------------------------------------------------------------------------------------------------------------------------------------------------------------------------------------------------------------------------------------------------------------------------------------------------------------------------------------------------------------------------------------------------------------------------------------------------------------------------------------------------------------------------------------------------------------------------------------------------------------------------------------------------------------------------------------------------------------------------------------------------------------------------------------------------------------------------------------------------------------------------------------------------------------------------------------------------------------|
|                                                                              |                                          | <ul style="list-style-type: none"> <li>• CLOSE doors and windows</li> <li>• CLOSE fireplace dampers</li> <li>• CONTACT [<i>source</i>] to report [information/exposure/suspicious activity/suspect, etc.] at [<i>contact info</i>]</li> <li>• DO NOT enter [<i>location</i>]</li> <li>• DO NOT return to area after evacuation [until/unless] [authorized/directed] by local officials</li> <li>• FOLLOW evacuation orders [<i>info</i>]</li> <li>• FOLLOW instructions from [<i>source</i>]</li> <li>• IF [HURT, SICK], and need emergency care, call 911</li> <li>• IF DRIVING to evacuate area, keep car windows and vents closed</li> <li>• IF OUTSIDE [OR DRIVING], go inside the nearest building</li> <li>• LEAVE areas near [<i>location</i>]</li> <li>• REPORT [gas leak, exposure to [hazard]] to [<i>source</i>] to receive instructions [<i>contact info</i>]</li> <li>• SEAL any gaps/openings with tape to keep bad air out</li> <li>• STAY away from [<i>location</i>] until further notice</li> <li>• STAY indoors until further notice</li> <li>• TURN OFF all fans and heating and air conditioning system</li> </ul> |
| 7. TIME: When should people take protective action? Will the message expire? | NOW; before ## (AM/PM); until ## (AM/PM) | NOW; before ## (AM/PM); until ## (AM/PM)                                                                                                                                                                                                                                                                                                                                                                                                                                                                                                                                                                                                                                                                                                                                                                                                                                                                                                                                                                                                                                                                                                |

|                                                                |     |                                                                                                      |
|----------------------------------------------------------------|-----|------------------------------------------------------------------------------------------------------|
| 8. ADDITIONAL GUIDANCE:<br>Where should people go for updates? | N/A | <ul style="list-style-type: none"> <li>CHECK [source] for [updates/information] at [info]</li> </ul> |
|----------------------------------------------------------------|-----|------------------------------------------------------------------------------------------------------|

#### Pre-event Message Template

- None

#### During/Post Event Message Template

- [Source] TOXIC FUMES released at ## (AM/PM) in [location]. Exposure to chemicals/fumes may cause difficulty breathing, loss of coordination, burning sensation in eyes/nose/throat/lungs, nausea, and possibly death. STAY indoors until further notice. CLOSE doors and windows. SEAL any gaps/openings with tape to keep bad air out. STAY away from [location] until further notice.

## LAW ENFORCEMENT HAZARDS

### ACTIVE SHOOTER

| MESSAGE WRITING STEPS                                                                                                                  | PRE-EVENT CONTENT                                                                                     | DURING OR POST-EVENT CONTENT                                                                          |
|----------------------------------------------------------------------------------------------------------------------------------------|-------------------------------------------------------------------------------------------------------|-------------------------------------------------------------------------------------------------------|
| 1. SOURCE: Which agency should be listed as the source of this message?                                                                | <i>Select a source that is familiar and trusted. Do not use an acronym for the source.</i>            | <i>Select a source that is familiar and trusted. Do not use an acronym for the source.</i>            |
| 2. HAZARD: What type of hazardous event is happening or about to happen?                                                               | ACTIVE SHOOTER                                                                                        | ACTIVE SHOOTER                                                                                        |
| 3. HAZARD IMPACTS: What are the consequences of this threat that the public should be aware of or how will it affect them personally?  | N/A                                                                                                   | ACTIVE SHOOTER in [location]. You could be shot, injured, or killed.                                  |
| 4. HAZARD LOCATION: Where is the hazardous event occurring? If the hazard is moving, in what direction is it moving or likely to move? | <i>Select well-known landmarks; town/city/county (all or portion); major road(s)/intersection(s).</i> | <i>Select well-known landmarks; town/city/county (all or portion); major road(s)/intersection(s).</i> |
| 5. RESPONSE LOCATION: Is there a specific location that should be evacuated or avoided by people? If so, where should they go?         | <i>Select well-known landmarks; town/city/county (all or portion); major road(s)/intersection(s).</i> | <i>Select well-known landmarks; town/city/county (all or portion); major road(s)/intersection(s).</i> |
| 6. PROTECTIVE ACTION GUIDANCE: What are the specific                                                                                   | N/A                                                                                                   | <ul style="list-style-type: none"> <li>• AVOID area around [location] until further notice</li> </ul> |

|                                                                                     |                                                 |                                                                                                                                                                                                                                                                                                                                                                                                                                                                                                                                                                                                                                                                                                                                                                                                                                       |
|-------------------------------------------------------------------------------------|-------------------------------------------------|---------------------------------------------------------------------------------------------------------------------------------------------------------------------------------------------------------------------------------------------------------------------------------------------------------------------------------------------------------------------------------------------------------------------------------------------------------------------------------------------------------------------------------------------------------------------------------------------------------------------------------------------------------------------------------------------------------------------------------------------------------------------------------------------------------------------------------------|
| <p>actions people receiving the message should take?</p>                            |                                                 | <ul style="list-style-type: none"> <li>• CALL 911 when you are safe and can describe the [[attacker/suspect], <i>location</i>, weapons, etc.]</li> <li>• DO NOT confront [shooter/suspect/group]</li> <li>• DO NOT enter [<i>location</i>]</li> <li>• FIGHT as a last resort</li> <li>• FOLLOW instructions from [<i>source</i>]</li> <li>• HIDE by going into the nearest room. Lock and block doors. Turn off lights and cell phone ringer. Stay silent.</li> <li>• LEAVE areas near [<i>location</i>]</li> <li>• LOCK and block doors</li> <li>• RUN away from [<i>location</i>]. Leave belongings behind</li> <li>• STAY away from [<i>location</i>] until further notice</li> <li>• STAY indoors until further notice</li> <li>• WAIT for [further instructions/updates/more <i>information</i>] from [<i>source</i>]</li> </ul> |
| <p>7. TIME: When should people take protective action? Will the message expire?</p> | <p>NOW; before ## (AM/PM); until ## (AM/PM)</p> | <p>NOW; before ## (AM/PM); until ## (AM/PM)</p>                                                                                                                                                                                                                                                                                                                                                                                                                                                                                                                                                                                                                                                                                                                                                                                       |
| <p>8. ADDITIONAL GUIDANCE: Where should people go for updates?</p>                  | <p>N/A</p>                                      | <ul style="list-style-type: none"> <li>• CHECK [<i>source</i>] for [updates/information] at [<i>info</i>]</li> <li>•</li> </ul>                                                                                                                                                                                                                                                                                                                                                                                                                                                                                                                                                                                                                                                                                                       |

**Pre-event Message Template**

- None

**During/Post Event Message Template**

- [Source] ACTIVE SHOOTER in [location] at ## (AM/PM). You could be shot, injured, or killed. STAY indoors until further notice. LOCK and block doors. WAIT for [further instructions/updates/more information] from [source].

**BOMB THREAT**

| MESSAGE WRITING STEPS                                                                                                                  | PRE-EVENT CONTENT                                                                                     | DURING OR POST-EVENT CONTENT                                                                                                                                                          |
|----------------------------------------------------------------------------------------------------------------------------------------|-------------------------------------------------------------------------------------------------------|---------------------------------------------------------------------------------------------------------------------------------------------------------------------------------------|
| 1. SOURCE: Which agency should be listed as the source of this message?                                                                | <i>Select a source that is familiar and trusted. Do not use an acronym for the source.</i>            | <i>Select a source that is familiar and trusted. Do not use an acronym for the source.</i>                                                                                            |
| 2. HAZARD: What type of hazardous event is happening or about to happen?                                                               | BOMB THREAT                                                                                           | BOMB THREAT                                                                                                                                                                           |
| 3. HAZARD IMPACTS: What are the consequences of this threat that the public should be aware of or how will it affect them personally?  | N/A                                                                                                   | BOMB THREAT in [location]. Potential for deadly explosions. Road closures and traffic delays possible in area.                                                                        |
| 4. HAZARD LOCATION: Where is the hazardous event occurring? If the hazard is moving, in what direction is it moving or likely to move? | <i>Select well-known landmarks; town/city/county (all or portion); major road(s)/intersection(s).</i> | <i>Select well-known landmarks; town/city/county (all or portion); major road(s)/intersection(s).</i>                                                                                 |
| 5. RESPONSE LOCATION: Is there a specific location that should be evacuated or avoided by people? If so, where should they go?         | <i>Select well-known landmarks; town/city/county (all or portion); major road(s)/intersection(s).</i> | <i>Select well-known landmarks; town/city/county (all or portion); major road(s)/intersection(s).</i>                                                                                 |
| 6. PROTECTIVE ACTION GUIDANCE: What are the specific actions people receiving the message should take?                                 | N/A                                                                                                   | <ul style="list-style-type: none"> <li>• AVOID area around [location] until further notice</li> <li>• DO NOT enter [location]</li> <li>• FOLLOW instructions from [source]</li> </ul> |

|                                                                              |                                          |                                                                                                                                                                                                                                                 |
|------------------------------------------------------------------------------|------------------------------------------|-------------------------------------------------------------------------------------------------------------------------------------------------------------------------------------------------------------------------------------------------|
|                                                                              |                                          | <ul style="list-style-type: none"> <li>• STAY away from [<i>location</i>] until further notice</li> <li>• STAY indoors until further notice</li> <li>• WAIT for [further instructions/updates/more information] from [<i>source</i>]</li> </ul> |
| 7. TIME: When should people take protective action? Will the message expire? | NOW; before ## (AM/PM); until ## (AM/PM) | NOW; before ## (AM/PM); until ## (AM/PM)                                                                                                                                                                                                        |
| 8. ADDITIONAL GUIDANCE: Where should people go for updates?                  | N/A                                      | <ul style="list-style-type: none"> <li>• CHECK [<i>source</i>] for [updates/information] at [<i>info</i>]</li> <li>•</li> </ul>                                                                                                                 |

#### Pre-event Message Template

- None

#### During/Post Event Message Template

- [*Source*] BOMB THREAT in [*location*] at ## (AM/PM). Potential for deadly explosions. Road closures and traffic delays possible in area. STAY away from [*location*] until further notice. WAIT for [further instructions/updates/more information] from [*source*].



**CIVIL DISTURBANCE**

| MESSAGE WRITING STEPS                                                                                                                  | PRE-EVENT CONTENT                                                                                     | DURING OR POST-EVENT CONTENT                                                                                                                                                             |
|----------------------------------------------------------------------------------------------------------------------------------------|-------------------------------------------------------------------------------------------------------|------------------------------------------------------------------------------------------------------------------------------------------------------------------------------------------|
| 1. SOURCE: Which agency should be listed as the source of this message?                                                                | <i>Select a source that is familiar and trusted. Do not use an acronym for the source.</i>            | <i>Select a source that is familiar and trusted. Do not use an acronym for the source.</i>                                                                                               |
| 2. HAZARD: What type of hazardous event is happening or about to happen?                                                               | CIVIL DISTURBANCE                                                                                     | CIVIL DISTURBANCE                                                                                                                                                                        |
| 3. HAZARD IMPACTS: What are the consequences of this threat that the public should be aware of or how will it affect them personally?  | N/A                                                                                                   | CIVIL DISTURBANCE in [location]. May cause [road closures, property damage, injury, or death].                                                                                           |
| 4. HAZARD LOCATION: Where is the hazardous event occurring? If the hazard is moving, in what direction is it moving or likely to move? | <i>Select well-known landmarks; town/city/county (all or portion); major road(s)/intersection(s).</i> | <i>Select well-known landmarks; town/city/county (all or portion); major road(s)/intersection(s).</i>                                                                                    |
| 5. RESPONSE LOCATION: Is there a specific location that should be evacuated or avoided by people? If so, where should they go?         | <i>Select well-known landmarks; town/city/county (all or portion); major road(s)/intersection(s).</i> | <i>Select well-known landmarks; town/city/county (all or portion); major road(s)/intersection(s).</i>                                                                                    |
| 6. PROTECTIVE ACTION GUIDANCE: What are the specific actions people receiving the message should take?                                 | N/A                                                                                                   | <ul style="list-style-type: none"> <li>• AVOID area around [location] until further notice</li> <li>• BE READY to [evacuate/leave] [location] when advised by local officials</li> </ul> |

|                                                                              |                                          |                                                                                                                                                                                                                                                                                                                                                                                                                                                                                                                                                                                                                             |
|------------------------------------------------------------------------------|------------------------------------------|-----------------------------------------------------------------------------------------------------------------------------------------------------------------------------------------------------------------------------------------------------------------------------------------------------------------------------------------------------------------------------------------------------------------------------------------------------------------------------------------------------------------------------------------------------------------------------------------------------------------------------|
|                                                                              |                                          | <ul style="list-style-type: none"> <li>• CALL or text [<i>phone number</i>] if you or others are [<i>injured/in danger/trapped/buried/have an emergency</i>]</li> <li>• DO NOT confront [<i>shooter/suspect/group</i>]</li> <li>• DO NOT enter [<i>location</i>]</li> <li>• FOLLOW instructions from [<i>source</i>]</li> <li>• LEAVE areas near [<i>location</i>]</li> <li>• LOCK and block doors</li> <li>• STAY away from [<i>location</i>] until further notice</li> <li>• STAY indoors until further notice</li> <li>• WAIT for [<i>further instructions/updates/more information</i>] from [<i>source</i>]</li> </ul> |
| 7. TIME: When should people take protective action? Will the message expire? | NOW; before ## (AM/PM); until ## (AM/PM) | NOW; before ## (AM/PM); until ## (AM/PM)                                                                                                                                                                                                                                                                                                                                                                                                                                                                                                                                                                                    |
| 8. ADDITIONAL GUIDANCE: Where should people go for updates?                  | N/A                                      | <ul style="list-style-type: none"> <li>• CHECK [<i>source</i>] for [<i>updates/information</i>] at [<i>info</i>]</li> </ul>                                                                                                                                                                                                                                                                                                                                                                                                                                                                                                 |

### Pre-event Message Template

- None

### During/Post Event Message Template

- [Source] CIVIL DISTURBANCE in [location] at ## (AM/PM). May cause [road closures, property damage, injury, or death]. STAY indoors until further notice. LOCK and block doors. WAIT for [further instructions/updates/more information] from [source].

**HOSTAGE TAKING**

| MESSAGE WRITING STEPS                                                                                                                  | PRE-EVENT CONTENT                                                                                     | DURING OR POST-EVENT CONTENT                                                                                             |
|----------------------------------------------------------------------------------------------------------------------------------------|-------------------------------------------------------------------------------------------------------|--------------------------------------------------------------------------------------------------------------------------|
| 1. SOURCE: Which agency should be listed as the source of this message?                                                                | <i>Select a source that is familiar and trusted. Do not use an acronym for the source.</i>            | <i>Select a source that is familiar and trusted. Do not use an acronym for the source.</i>                               |
| 2. HAZARD: What type of hazardous event is happening or about to happen?                                                               | HOSTAGE TAKING                                                                                        | HOSTAGE TAKING                                                                                                           |
| 3. HAZARD IMPACTS: What are the consequences of this threat that the public should be aware of or how will it affect them personally?  | N/A                                                                                                   | HOSTAGES have been taken by an [armed] person in [location]. Roads [are/will be] closed in area, causing traffic delays. |
| 4. HAZARD LOCATION: Where is the hazardous event occurring? If the hazard is moving, in what direction is it moving or likely to move? | <i>Select well-known landmarks; town/city/county (all or portion); major road(s)/intersection(s).</i> | <i>Select well-known landmarks; town/city/county (all or portion); major road(s)/intersection(s).</i>                    |
| 5. RESPONSE LOCATION: Is there a specific location that should be evacuated or avoided by people? If so, where should they go?         | <i>Select well-known landmarks; town/city/county (all or portion); major road(s)/intersection(s).</i> | <i>Select well-known landmarks; town/city/county (all or portion); major road(s)/intersection(s).</i>                    |

|                                                                                                                      |                                          |                                                                                                                                                                                                                                                                                                                                                                                                                                                   |
|----------------------------------------------------------------------------------------------------------------------|------------------------------------------|---------------------------------------------------------------------------------------------------------------------------------------------------------------------------------------------------------------------------------------------------------------------------------------------------------------------------------------------------------------------------------------------------------------------------------------------------|
| <p>6. PROTECTIVE ACTION</p> <p>GUIDANCE: What are the specific actions people receiving the message should take?</p> | N/A                                      | <ul style="list-style-type: none"> <li>• AVOID area around [<i>location</i>] until further notice</li> <li>• DO NOT enter [<i>location</i>]</li> <li>• FOLLOW instructions from [<i>source</i>]</li> <li>• LOCK and block doors</li> <li>• STAY away from [<i>location</i>] until further notice</li> <li>• STAY indoors until further notice</li> <li>• WAIT for [further instructions/updates/more information] from [<i>source</i>]</li> </ul> |
| <p>7. TIME: When should people take protective action? Will the message expire?</p>                                  | NOW; before ## (AM/PM); until ## (AM/PM) | NOW; before ## (AM/PM); until ## (AM/PM)                                                                                                                                                                                                                                                                                                                                                                                                          |
| <p>8. ADDITIONAL GUIDANCE: Where should people go for updates?</p>                                                   | N/A                                      | <ul style="list-style-type: none"> <li>• CHECK [<i>source</i>] for [updates/information] at [<i>info</i>]</li> </ul>                                                                                                                                                                                                                                                                                                                              |

#### Pre-event Message Template

- None

#### During/Post Event Message Template

- [*Source*] HOSTAGES have been taken by an [*armed*] person in [*location*] at ## (AM/PM). Roads [*are/will be*] closed in area, causing traffic delays. DO NOT enter [*location*]. WAIT for [further instructions/updates/more information] from [*source*].

**LAW ENFORCEMENT ACTIVITY**

| MESSAGE WRITING STEPS                                                                                                                  | PRE-EVENT CONTENT                                                                                     | DURING OR POST-EVENT CONTENT                                                                                                      |
|----------------------------------------------------------------------------------------------------------------------------------------|-------------------------------------------------------------------------------------------------------|-----------------------------------------------------------------------------------------------------------------------------------|
| 1. SOURCE: Which agency should be listed as the source of this message?                                                                | <i>Select a source that is familiar and trusted. Do not use an acronym for the source.</i>            | <i>Select a source that is familiar and trusted. Do not use an acronym for the source.</i>                                        |
| 2. HAZARD: What type of hazardous event is happening or about to happen?                                                               | LAW ENFORCEMENT ACTIVITY                                                                              | LAW ENFORCEMENT ACTIVITY                                                                                                          |
| 3. HAZARD IMPACTS: What are the consequences of this threat that the public should be aware of or how will it affect them personally?  | N/A                                                                                                   | [Law enforcement/Police] [activity/presence/situation/incident] in [location]. Road closures and traffic delays possible in area. |
| 4. HAZARD LOCATION: Where is the hazardous event occurring? If the hazard is moving, in what direction is it moving or likely to move? | <i>Select well-known landmarks; town/city/county (all or portion); major road(s)/intersection(s).</i> | <i>Select well-known landmarks; town/city/county (all or portion); major road(s)/intersection(s).</i>                             |
| 5. RESPONSE LOCATION: Is there a specific location that should be evacuated or avoided by people? If so, where should they go?         | <i>Select well-known landmarks; town/city/county (all or portion); major road(s)/intersection(s).</i> | <i>Select well-known landmarks; town/city/county (all or portion); major road(s)/intersection(s).</i>                             |
| 6. PROTECTIVE ACTION GUIDANCE: What are the specific actions people receiving the message should take?                                 | N/A                                                                                                   | <ul style="list-style-type: none"> <li>• AVOID area around [location] until further notice</li> </ul>                             |

|                                                                              |                                          |                                                                                                                                                                                                                                                                                                                                                                                                                                    |
|------------------------------------------------------------------------------|------------------------------------------|------------------------------------------------------------------------------------------------------------------------------------------------------------------------------------------------------------------------------------------------------------------------------------------------------------------------------------------------------------------------------------------------------------------------------------|
|                                                                              |                                          | <ul style="list-style-type: none"> <li>• CONTACT [source] to report [information/exposure/suspicious activity/suspect, etc.] at [contact info]</li> <li>• DO NOT enter [location]</li> <li>• FOLLOW instructions from [source]</li> <li>• STAY away from [location] until further notice</li> <li>• STAY indoors until further notice</li> <li>• WAIT for [further instructions/updates/more information] from [source]</li> </ul> |
| 7. TIME: When should people take protective action? Will the message expire? | NOW; before ## (AM/PM); until ## (AM/PM) | NOW; before ## (AM/PM); until ## (AM/PM)                                                                                                                                                                                                                                                                                                                                                                                           |
| 8. ADDITIONAL GUIDANCE: Where should people go for updates?                  | N/A                                      | CHECK [source] for [updates/information] at [info]                                                                                                                                                                                                                                                                                                                                                                                 |

**Pre-event Message Template**

- None

**During/Post Event Message Template**

- [Source] [LAW ENFORCEMENT/POLICE] [activity/presence/situation/incident] in [location] at ## (AM/PM). Road closures and traffic delays possible in area. AVOID area around [location] until further notice. CHECK [source] for [updates/information] at [info].

**SUSPECT IN AREA**

| MESSAGE WRITING STEPS                                                                                                                  | PRE-EVENT CONTENT                                                                                     | DURING OR POST-EVENT CONTENT                                                                               |
|----------------------------------------------------------------------------------------------------------------------------------------|-------------------------------------------------------------------------------------------------------|------------------------------------------------------------------------------------------------------------|
| 1. SOURCE: Which agency should be listed as the source of this message?                                                                | <i>Select a source that is familiar and trusted. Do not use an acronym for the source.</i>            | <i>Select a source that is familiar and trusted. Do not use an acronym for the source.</i>                 |
| 2. HAZARD: What type of hazardous event is happening or about to happen?                                                               | SUSPECT IN AREA                                                                                       | SUSPECT IN AREA                                                                                            |
| 3. HAZARD IMPACTS: What are the consequences of this threat that the public should be aware of or how will it affect them personally?  | N/A                                                                                                   | Law enforcement personnel are searching for [armed/dangerous] suspect in [location]. [Person description]. |
| 4. HAZARD LOCATION: Where is the hazardous event occurring? If the hazard is moving, in what direction is it moving or likely to move? | <i>Select well-known landmarks; town/city/county (all or portion); major road(s)/intersection(s).</i> | <i>Select well-known landmarks; town/city/county (all or portion); major road(s)/intersection(s).</i>      |
| 5. RESPONSE LOCATION: Is there a specific location that should be evacuated or avoided by people? If so, where should they go?         | <i>Select well-known landmarks; town/city/county (all or portion); major road(s)/intersection(s).</i> | <i>Select well-known landmarks; town/city/county (all or portion); major road(s)/intersection(s).</i>      |
| 6. PROTECTIVE ACTION GUIDANCE: What are the specific actions people receiving the message should take?                                 | N/A                                                                                                   | <ul style="list-style-type: none"> <li>• AVOID area around [location] until further notice</li> </ul>      |

|                                                                              |                                          |                                                                                                                                                                                                                                                                                                                                                                                                                                                                                                                       |
|------------------------------------------------------------------------------|------------------------------------------|-----------------------------------------------------------------------------------------------------------------------------------------------------------------------------------------------------------------------------------------------------------------------------------------------------------------------------------------------------------------------------------------------------------------------------------------------------------------------------------------------------------------------|
|                                                                              |                                          | <ul style="list-style-type: none"> <li>• CONTACT [source] to report [information/exposure/suspicious activity/suspect, etc.] at [contact info]</li> <li>• DO NOT confront [shooter/suspect/group]</li> <li>• DO NOT enter [location]</li> <li>• FOLLOW instructions from [source]</li> <li>• LOCK and block doors</li> <li>• STAY away from [location] until further notice</li> <li>• STAY indoors until further notice</li> <li>• WAIT for [further instructions/updates/more information] from [source]</li> </ul> |
| 7. TIME: When should people take protective action? Will the message expire? | NOW; before ## (AM/PM); until ## (AM/PM) | NOW; before ## (AM/PM); until ## (AM/PM)                                                                                                                                                                                                                                                                                                                                                                                                                                                                              |
| 8. ADDITIONAL GUIDANCE: Where should people go for updates?                  | N/A                                      | <ul style="list-style-type: none"> <li>• CHECK [source] for [updates/information] at [info]</li> </ul>                                                                                                                                                                                                                                                                                                                                                                                                                |

**Pre-event Message Template**

- None

**During/Post Event Message Template**

- [Source] Law enforcement personnel are searching for [armed/dangerous] suspect in [location] at ## (AM/PM). [Person description]. STAY away from [location] until further notice. STAY indoors until further notice. FOLLOW instructions from [source].



**PUBLIC HEALTH HAZARDS**

**AIR QUALITY**

| MESSAGE WRITING STEPS                                                                                                                  | PRE-EVENT CONTENT                                                                                     | DURING OR POST-EVENT CONTENT                                                                                                                                                                                                                                                                                                           |
|----------------------------------------------------------------------------------------------------------------------------------------|-------------------------------------------------------------------------------------------------------|----------------------------------------------------------------------------------------------------------------------------------------------------------------------------------------------------------------------------------------------------------------------------------------------------------------------------------------|
| 1. SOURCE: Which agency should be listed as the source of this message?                                                                | <i>Select a source that is familiar and trusted. Do not use an acronym for the source.</i>            | <i>Select a source that is familiar and trusted. Do not use an acronym for the source.</i>                                                                                                                                                                                                                                             |
| 2. HAZARD: What type of hazardous event is happening or about to happen?                                                               | AIR QUALITY                                                                                           | AIR QUALITY                                                                                                                                                                                                                                                                                                                            |
| 3. HAZARD IMPACTS: What are the consequences of this threat that the public should be aware of or how will it affect them personally?  | N/A                                                                                                   | AIR QUALITY in [ <i>location</i> ] has reached [ <i>unhealthy/hazardous levels</i> ] for [ <i>sensitive groups, including those with heart/lung disease and asthma, older adults, children</i> ]/[ <i>everyone</i> ]. Exposure can irritate the throat and lungs and may cause shortness of breath, coughing/wheezing, and chest pain. |
| 4. HAZARD LOCATION: Where is the hazardous event occurring? If the hazard is moving, in what direction is it moving or likely to move? | <i>Select well-known landmarks; town/city/county (all or portion); major road(s)/intersection(s).</i> | <i>Select well-known landmarks; town/city/county (all or portion); major road(s)/intersection(s).</i>                                                                                                                                                                                                                                  |
| 5. RESPONSE LOCATION: Is there a specific location that should be evacuated or avoided by people? If so, where should they go?         | <i>Select well-known landmarks; town/city/county (all or portion); major road(s)/intersection(s).</i> | <i>Select well-known landmarks; town/city/county (all or portion); major road(s)/intersection(s).</i>                                                                                                                                                                                                                                  |

|                                                                                                           |                                          |                                                                                                                                               |
|-----------------------------------------------------------------------------------------------------------|------------------------------------------|-----------------------------------------------------------------------------------------------------------------------------------------------|
| 6. PROTECTIVE ACTION<br>GUIDANCE: What are the specific actions people receiving the message should take? | N/A                                      | <ul style="list-style-type: none"> <li>LIMIT time outside to no more than [etc.] minutes</li> <li>STAY indoors as much as possible</li> </ul> |
| 7. TIME: When should people take protective action? Will the message expire?                              | NOW; before ## (AM/PM); until ## (AM/PM) | NOW; before ## (AM/PM); until ## (AM/PM)                                                                                                      |
| 8. ADDITIONAL GUIDANCE:<br>Where should people go for updates?                                            | N/A                                      | <ul style="list-style-type: none"> <li>CHECK [source] for [updates/information] at [info]</li> </ul>                                          |

#### Pre-event Message Template

- None

#### During/Post Event Message Template

- [Source] AIR QUALITY in [location] has reached [unhealthy/hazardous levels] for [sensitive groups, including those with heart/lung disease and asthma, older adults, children]/[everyone]. Exposure can irritate the throat and lungs and may cause shortness of breath, coughing/wheezing, and chest pain. Beginning ## (AM/PM) LIMIT time outside to no more than [etc.] minutes. STAY indoors as much as possible until ## (AM/PM). CHECK [source] for [updates/information] at [info].

**BIO (BIOLOGICAL) HAZARD**

| MESSAGE WRITING STEPS                                                                                                                  | PRE-EVENT CONTENT                                                                                     | DURING OR POST-EVENT CONTENT                                                                                                                      |
|----------------------------------------------------------------------------------------------------------------------------------------|-------------------------------------------------------------------------------------------------------|---------------------------------------------------------------------------------------------------------------------------------------------------|
| 1. SOURCE: Which agency should be listed as the source of this message?                                                                | <i>Select a source that is familiar and trusted. Do not use an acronym for the source.</i>            | <i>Select a source that is familiar and trusted. Do not use an acronym for the source.</i>                                                        |
| 2. HAZARD: What type of hazardous event is happening or about to happen?                                                               | BIO (BIOLOGICAL) HAZARD                                                                               | BIO (BIOLOGICAL) HAZARD                                                                                                                           |
| 3. HAZARD IMPACTS: What are the consequences of this threat that the public should be aware of or how will it affect them personally?  | N/A                                                                                                   | A BIOLOGICAL HAZARD has been identified in [location]. Exposure to viruses, bacteria, and/or contaminated materials may cause infection or death. |
| 4. HAZARD LOCATION: Where is the hazardous event occurring? If the hazard is moving, in what direction is it moving or likely to move? | <i>Select well-known landmarks; town/city/county (all or portion); major road(s)/intersection(s).</i> | <i>Select well-known landmarks; town/city/county (all or portion); major road(s)/intersection(s).</i>                                             |
| 5. RESPONSE LOCATION: Is there a specific location that should be evacuated or avoided by people? If so, where should they go?         | <i>Select well-known landmarks; town/city/county (all or portion); major road(s)/intersection(s).</i> | <i>Select well-known landmarks; town/city/county (all or portion); major road(s)/intersection(s).</i>                                             |
| 6. PROTECTIVE ACTION GUIDANCE: What are the specific actions people receiving the message should take?                                 | N/A                                                                                                   | <ul style="list-style-type: none"> <li>• AVOID area around [location] until further notice</li> </ul>                                             |

|                                                                              |                                          |                                                                                                                                                                                                                                                                                                                                                                                                                                                                                                                                                                                                                                                                                                                                                                                                                                                                                                                                                                         |
|------------------------------------------------------------------------------|------------------------------------------|-------------------------------------------------------------------------------------------------------------------------------------------------------------------------------------------------------------------------------------------------------------------------------------------------------------------------------------------------------------------------------------------------------------------------------------------------------------------------------------------------------------------------------------------------------------------------------------------------------------------------------------------------------------------------------------------------------------------------------------------------------------------------------------------------------------------------------------------------------------------------------------------------------------------------------------------------------------------------|
|                                                                              |                                          | <ul style="list-style-type: none"> <li>• CONTACT [<i>source</i>] to report [<i>information/exposure/suspicious activity/suspect, etc.</i>] at [<i>contact info</i>]</li> <li>• COVER your nose and mouth with a cloth/mask to protect breathing from [<i>smoke, particles, ash, fumes, etc.</i>] while [<i>evacuating/sheltering/outside/near area</i>]</li> <li>• DO NOT enter [<i>location</i>]</li> <li>• DO NOT return to area after evacuation [<i>until/unless</i>] [<i>authorized/directed</i>] by local officials</li> <li>• FOLLOW instructions from [<i>source</i>]</li> <li>• IF experiencing [<i>symptoms</i>], contact [<i>source</i>] at [<i>contact info</i>]</li> <li>• LEAVE areas near [<i>location</i>]</li> <li>• STAY indoors until further notice</li> <li>• WASH your hands with soap and water for at least 20 seconds</li> <li>• WHEN IN PUBLIC, stay [<i>distance</i>] away from other people who are not a part of your household</li> </ul> |
| 7. TIME: When should people take protective action? Will the message expire? | NOW; before ## (AM/PM); until ## (AM/PM) | NOW; before ## (AM/PM); until ## (AM/PM)                                                                                                                                                                                                                                                                                                                                                                                                                                                                                                                                                                                                                                                                                                                                                                                                                                                                                                                                |
| 8. ADDITIONAL GUIDANCE: Where should people go for updates?                  | N/A                                      | CHECK [ <i>source</i> ] for [ <i>updates/information</i> ] at [ <i>info</i> ]                                                                                                                                                                                                                                                                                                                                                                                                                                                                                                                                                                                                                                                                                                                                                                                                                                                                                           |

### Pre-event Message Template

- None

**During/Post Event Message Template**

- [*Source*] A BIOLOGICAL HAZARD has been identified in [*location*] at ## (AM/PM). Exposure to viruses, bacteria, and/or contaminated materials may cause infection or death. AVOID area around [*location*] until further notice. STAY indoors until further notice. FOLLOW instructions from [*source*].

**INFECTIOUS DISEASE/NOVEL PANDEMIC**

| MESSAGE WRITING STEPS                                                                                                                  | PRE-EVENT CONTENT                                                                                     | DURING OR POST-EVENT CONTENT                                                                                                                                                                             |
|----------------------------------------------------------------------------------------------------------------------------------------|-------------------------------------------------------------------------------------------------------|----------------------------------------------------------------------------------------------------------------------------------------------------------------------------------------------------------|
| 1. SOURCE: Which agency should be listed as the source of this message?                                                                | <i>Select a source that is familiar and trusted. Do not use an acronym for the source.</i>            | <i>Select a source that is familiar and trusted. Do not use an acronym for the source.</i>                                                                                                               |
| 2. HAZARD: What type of hazardous event is happening or about to happen?                                                               | INFECTIOUS DISEASE/NOVEL PANDEMIC                                                                     | INFECTIOUS DISEASE/NOVEL PANDEMIC                                                                                                                                                                        |
| 3. HAZARD IMPACTS: What are the consequences of this threat that the public should be aware of or how will it affect them personally?  | N/A                                                                                                   | A [contagious infectious disease outbreak/novel pandemic] has been identified in [location]. Exposure may cause [fever, diarrhea, fatigue, muscle aches, and/or may be life threatening].                |
| 4. HAZARD LOCATION: Where is the hazardous event occurring? If the hazard is moving, in what direction is it moving or likely to move? | <i>Select well-known landmarks; town/city/county (all or portion); major road(s)/intersection(s).</i> | <i>Select well-known landmarks; town/city/county (all or portion); major road(s)/intersection(s).</i>                                                                                                    |
| 5. RESPONSE LOCATION: Is there a specific location that should be evacuated or avoided by people? If so, where should they go?         | <i>Select well-known landmarks; town/city/county (all or portion); major road(s)/intersection(s).</i> | <i>Select well-known landmarks; town/city/county (all or portion); major road(s)/intersection(s).</i>                                                                                                    |
| 6. PROTECTIVE ACTION GUIDANCE: What are the specific actions people receiving the message should take?                                 | N/A                                                                                                   | <ul style="list-style-type: none"> <li>• CLEAN and disinfect commonly used objects and surfaces, such as doorknobs, counters, and light switches</li> <li>• FOLLOW instructions from [source]</li> </ul> |

|                                                                              |                                          |                                                                                                                                                                                                                                                                                                                                                                             |
|------------------------------------------------------------------------------|------------------------------------------|-----------------------------------------------------------------------------------------------------------------------------------------------------------------------------------------------------------------------------------------------------------------------------------------------------------------------------------------------------------------------------|
|                                                                              |                                          | <ul style="list-style-type: none"> <li>• STAY at home as much as possible to prevent the spread of disease</li> <li>• WASH your hands with soap and water for at least 20 seconds</li> <li>• WHEN IN PUBLIC, cover your mouth and nose with a mask</li> <li>• WHEN IN PUBLIC, stay [<i>distance</i>] away from other people who are not a part of your household</li> </ul> |
| 7. TIME: When should people take protective action? Will the message expire? | NOW; before ## (AM/PM); until ## (AM/PM) | NOW; before ## (AM/PM); until ## (AM/PM)                                                                                                                                                                                                                                                                                                                                    |
| 8. ADDITIONAL GUIDANCE: Where should people go for updates?                  | N/A                                      | <ul style="list-style-type: none"> <li>• CHECK [<i>source</i>] for [<i>updates/information</i>] at [<i>info</i>]</li> </ul>                                                                                                                                                                                                                                                 |

**Pre-event Message Template**

- None

**During/Post Event Message Template**

- [*Source*] A [contagious infectious disease outbreak/novel pandemic] has been identified in [*location*] at ## (AM/PM). Exposure may cause [fever, diarrhea, fatigue, muscle aches, and/or may be life threatening]. STAY at home as much as possible to prevent the spread of disease. FOLLOW instructions from [*source*]. CHECK [*source*] for [*updates/information*] at [*info*]

**PUBLIC SAFETY HAZARDS**

**911 SERVICE OUTAGE**

| MESSAGE WRITING STEPS                                                                                                                  | PRE-EVENT CONTENT                                                                                     | DURING OR POST-EVENT CONTENT                                                                                     |
|----------------------------------------------------------------------------------------------------------------------------------------|-------------------------------------------------------------------------------------------------------|------------------------------------------------------------------------------------------------------------------|
| 1. SOURCE: Which agency should be listed as the source of this message?                                                                | <i>Select a source that is familiar and trusted. Do not use an acronym for the source.</i>            | <i>Select a source that is familiar and trusted. Do not use an acronym for the source.</i>                       |
| 2. HAZARD: What type of hazardous event is happening or about to happen?                                                               | 911 SERVICE OUTAGE                                                                                    | 911 SERVICE OUTAGE                                                                                               |
| 3. HAZARD IMPACTS: What are the consequences of this threat that the public should be aware of or how will it affect them personally?  | N/A                                                                                                   | 911 SERVICES are down for [location]. Delays in [law enforcement, ambulance, fire service] response may occur.   |
| 4. HAZARD LOCATION: Where is the hazardous event occurring? If the hazard is moving, in what direction is it moving or likely to move? | <i>Select well-known landmarks; town/city/county (all or portion); major road(s)/intersection(s).</i> | <i>Select well-known landmarks; town/city/county (all or portion); major road(s)/intersection(s).</i>            |
| 5. RESPONSE LOCATION: Is there a specific location that should be evacuated or avoided by people? If so, where should they go?         | <i>Select well-known landmarks; town/city/county (all or portion); major road(s)/intersection(s).</i> | <i>Select well-known landmarks; town/city/county (all or portion); major road(s)/intersection(s).</i>            |
| 6. PROTECTIVE ACTION GUIDANCE: What are the specific                                                                                   | N/A                                                                                                   | <ul style="list-style-type: none"> <li>• CALL or text [phone number] if you or others are [injured/in</li> </ul> |



|                                                                              |                                          |                                                                                                                                                                                                                    |
|------------------------------------------------------------------------------|------------------------------------------|--------------------------------------------------------------------------------------------------------------------------------------------------------------------------------------------------------------------|
| actions people receiving the message should take?                            |                                          | danger/trapped/buried/have an emergency]<br><ul style="list-style-type: none"> <li>• TAG [<i>social media account</i>] or use [<i>#hashtag</i>] on [<i>Twitter, Facebook, etc.</i>] to report emergency</li> </ul> |
| 7. TIME: When should people take protective action? Will the message expire? | NOW; before ## (AM/PM); until ## (AM/PM) | NOW; before ## (AM/PM); until ## (AM/PM)                                                                                                                                                                           |
| 8. ADDITIONAL GUIDANCE:<br>Where should people go for updates?               | N/A                                      | <ul style="list-style-type: none"> <li>• CHECK [<i>source</i>] for [updates/information] at [<i>info</i>]</li> </ul>                                                                                               |

#### Pre-event Message Template

- None

#### During/Post Event Message Template

- [*Source*] 911 SERVICES are down for [*location*] at ## (AM/PM). Delays in [law enforcement, ambulance, fire service] response may occur. CALL or text [*phone number*] if you or others are [injured/in danger/trapped/buried/have an emergency]. CHECK [*source*] for [updates/information] at [*info*].

**BLACKOUT/BROWNOUT/POWER OUTAGE**

| MESSAGE WRITING STEPS                                                                                                                  | PRE-EVENT CONTENT                                                                                                                                                                                                                                              | DURING OR POST-EVENT CONTENT                                                                          |
|----------------------------------------------------------------------------------------------------------------------------------------|----------------------------------------------------------------------------------------------------------------------------------------------------------------------------------------------------------------------------------------------------------------|-------------------------------------------------------------------------------------------------------|
| 1. SOURCE: Which agency should be listed as the source of this message?                                                                | <i>Select a source that is familiar and trusted. Do not use an acronym for the source.</i>                                                                                                                                                                     | <i>Select a source that is familiar and trusted. Do not use an acronym for the source.</i>            |
| 2. HAZARD: What type of hazardous event is happening or about to happen?                                                               | BLACKOUT/BROWNOUT/POWER OUTAGE                                                                                                                                                                                                                                 | BLACKOUT/BROWNOUT/POWER OUTAGE                                                                        |
| 3. HAZARD IMPACTS: What are the consequences of this threat that the public should be aware of or how will it affect them personally?  | Temporary [rolling BLACKOUT/BROWNOUT/POWER OUTAGE] planned for [location]. [May/will] affect air conditioning/heating/fans, medical equipment, electronics, and water for drinking/eating, showering/toilet. Loss of refrigeration may affect perishable food. | N/A                                                                                                   |
| 4. HAZARD LOCATION: Where is the hazardous event occurring? If the hazard is moving, in what direction is it moving or likely to move? | <i>Select well-known landmarks; town/city/county (all or portion); major road(s)/intersection(s).</i>                                                                                                                                                          | <i>Select well-known landmarks; town/city/county (all or portion); major road(s)/intersection(s).</i> |
| 5. RESPONSE LOCATION: Is there a specific location that should be evacuated or avoided by people? If so, where should they go?         | <i>Select well-known landmarks; town/city/county (all or portion); major road(s)/intersection(s).</i>                                                                                                                                                          | <i>Select well-known landmarks; town/city/county (all or portion); major road(s)/intersection(s).</i> |

|                                                                                                                   |                                                                                                                                                                                                                                                                                                                                                                                                                                                                                                                                                                                                                                                                                                                  |                                                 |
|-------------------------------------------------------------------------------------------------------------------|------------------------------------------------------------------------------------------------------------------------------------------------------------------------------------------------------------------------------------------------------------------------------------------------------------------------------------------------------------------------------------------------------------------------------------------------------------------------------------------------------------------------------------------------------------------------------------------------------------------------------------------------------------------------------------------------------------------|-------------------------------------------------|
| <p>6. PROTECTIVE ACTION<br/>GUIDANCE: What are the specific actions people receiving the message should take?</p> | <ul style="list-style-type: none"> <li>• IF without [heat/air conditioning], go to a recommended public shelter [or [heated/air conditioned] building] by [time]: [info]</li> <li>• KEEP freezers and refrigerators closed</li> <li>• PREPARE by filling plastic bottles with water by [time]. Keep bottles in freezer/fridge to keep food cool</li> <li>• PREPARE by having non-perishable food and water on hand by [time]</li> <li>• PREPARE for power outages by fully charging your cell phone and backup batteries/external power packs</li> <li>• PREPARE for power outages by testing batteries in radios and flashlights by [time]</li> <li>• UNPLUG or disconnect [electronics, appliances]</li> </ul> | <p>N/A</p>                                      |
| <p>7. TIME: When should people take protective action? Will the message expire?</p>                               | <p>NOW; before ## (AM/PM); until ## (AM/PM)</p>                                                                                                                                                                                                                                                                                                                                                                                                                                                                                                                                                                                                                                                                  | <p>NOW; before ## (AM/PM); until ## (AM/PM)</p> |
| <p>8. ADDITIONAL GUIDANCE:<br/>Where should people go for updates?</p>                                            | <ul style="list-style-type: none"> <li>• CHECK [source] for [updates/information] at [info]</li> </ul>                                                                                                                                                                                                                                                                                                                                                                                                                                                                                                                                                                                                           | <p>N/A</p>                                      |

**Pre-event Message Template**

- [Source] Temporary [rolling BLACKOUT/BROWNOUT/POWER OUTAGE] planned for [location] beginning ## (AM/PM) until ## (AM/PM). [May/will] affect air conditioning/heating/fans, medical equipment, electronics, and water for drinking/eating,

showering/toilet. Loss of refrigeration may affect perishable food. PREPARE by having non-perishable food and water on hand by [*time*]. KEEP freezers and refrigerators closed.

**During/Post Event Message Template**

- None

**WATER SERVICE DISRUPTION**

| MESSAGE WRITING STEPS                                                                                                                  | PRE-EVENT CONTENT                                                                                     | DURING OR POST-EVENT CONTENT                                                                                                             |
|----------------------------------------------------------------------------------------------------------------------------------------|-------------------------------------------------------------------------------------------------------|------------------------------------------------------------------------------------------------------------------------------------------|
| 1. SOURCE: Which agency should be listed as the source of this message?                                                                | <i>Select a source that is familiar and trusted. Do not use an acronym for the source.</i>            | <i>Select a source that is familiar and trusted. Do not use an acronym for the source.</i>                                               |
| 2. HAZARD: What type of hazardous event is happening or about to happen?                                                               | WATER SERVICE DISRUPTION                                                                              | WATER SERVICE DISRUPTION                                                                                                                 |
| 3. HAZARD IMPACTS: What are the consequences of this threat that the public should be aware of or how will it affect them personally?  | N/A                                                                                                   | [NO WATER SERVICE/UTILITY FAILURE] in [location]. [Water is expected to be off for [time]/Return to normal status unknown at this time]. |
| 4. HAZARD LOCATION: Where is the hazardous event occurring? If the hazard is moving, in what direction is it moving or likely to move? | <i>Select well-known landmarks; town/city/county (all or portion); major road(s)/intersection(s).</i> | <i>Select well-known landmarks; town/city/county (all or portion); major road(s)/intersection(s).</i>                                    |
| 5. RESPONSE LOCATION: Is there a specific location that should be evacuated or avoided by people? If so, where should they go?         | <i>Select well-known landmarks; town/city/county (all or portion); major road(s)/intersection(s).</i> | <i>Select well-known landmarks; town/city/county (all or portion); major road(s)/intersection(s).</i>                                    |
| 6. PROTECTIVE ACTION GUIDANCE: What are the specific actions people receiving the message should take?                                 | N/A                                                                                                   | <ul style="list-style-type: none"> <li>• AVOID area around [location] until further notice</li> </ul>                                    |

|                                                                              |                                          |                                                                                                                                   |
|------------------------------------------------------------------------------|------------------------------------------|-----------------------------------------------------------------------------------------------------------------------------------|
|                                                                              |                                          | <ul style="list-style-type: none"> <li>• WAIT for [further instructions/updates/more information] from [<i>source</i>]</li> </ul> |
| 7. TIME: When should people take protective action? Will the message expire? | NOW; before ## (AM/PM); until ## (AM/PM) | NOW; before ## (AM/PM); until ## (AM/PM)                                                                                          |
| 8. ADDITIONAL GUIDANCE: Where should people go for updates?                  | N/A                                      | <ul style="list-style-type: none"> <li>• CHECK [<i>source</i>] for [updates/information] at [<i>info</i>]</li> </ul>              |

#### Pre-event Message Template

None

#### During/Post Event Message Template

- [*Source*] [NO WATER SERVICE/UTILITY FAILURE] in [*location*] at ## (AM/PM). [Water is expected to be off for [*time*]/Return to normal status unknown at this *time*]. AVOID area around [*location*] until further notice. WAIT for [further instructions/updates/more information] from [*source*].

**WILDFIRE**

| MESSAGE WRITING STEPS                                                                                                                  | PRE-EVENT CONTENT                                                                                                                                                                                                                                                   | DURING OR POST-EVENT CONTENT                                                                                                                                                                                                                               |
|----------------------------------------------------------------------------------------------------------------------------------------|---------------------------------------------------------------------------------------------------------------------------------------------------------------------------------------------------------------------------------------------------------------------|------------------------------------------------------------------------------------------------------------------------------------------------------------------------------------------------------------------------------------------------------------|
| 1. SOURCE: Which agency should be listed as the source of this message?                                                                | <i>Select a source that is familiar and trusted. Do not use an acronym for the source.</i>                                                                                                                                                                          | <i>Select a source that is familiar and trusted. Do not use an acronym for the source.</i>                                                                                                                                                                 |
| 2. HAZARD: What type of hazardous event is happening or about to happen?                                                               | WILDFIRE                                                                                                                                                                                                                                                            | WILDFIRE                                                                                                                                                                                                                                                   |
| 3. HAZARD IMPACTS: What are the consequences of this threat that the public should be aware of or how will it affect them personally?  | [WILDFIRE WARNING], [Level 1 Level 2, Level 3], [Ready, Set, Go], [Mandatory/Voluntary Evacuation]. Visibility in area will be reduced and roads/evacuation routes can become blocked; if you do not leave [now/by time], you could be trapped, injured, or killed. | [WILDFIRE WARNING], [Level 1 Level 2, Level 3], [Ready, Set, Go], [Mandatory/Voluntary Evacuation]]. Visibility in area will be reduced and roads/evacuation routes can become blocked; if you do not leave now, you could be trapped, injured, or killed. |
| 4. HAZARD LOCATION: Where is the hazardous event occurring? If the hazard is moving, in what direction is it moving or likely to move? | <i>Select well-known landmarks; town/city/county (all or portion); major road(s)/intersection(s).</i>                                                                                                                                                               | <i>Select well-known landmarks; town/city/county (all or portion); major road(s)/intersection(s).</i>                                                                                                                                                      |
| 5. RESPONSE LOCATION: Is there a specific location that should be evacuated or avoided by people? If so, where should they go?         | <i>Select well-known landmarks; town/city/county (all or portion); major road(s)/intersection(s).</i>                                                                                                                                                               | <i>Select well-known landmarks; town/city/county (all or portion); major road(s)/intersection(s).</i>                                                                                                                                                      |

|                                                                                                                      |                                                                                                                                                                                                                                                                                                                                                                                                                                                                                                                                                                                                                                                                                                                                                                                                                                                                                                                                                                                                                                                                                 |                                                                                                                                                                                                                                                                                                                                                                                                                                                                                                             |
|----------------------------------------------------------------------------------------------------------------------|---------------------------------------------------------------------------------------------------------------------------------------------------------------------------------------------------------------------------------------------------------------------------------------------------------------------------------------------------------------------------------------------------------------------------------------------------------------------------------------------------------------------------------------------------------------------------------------------------------------------------------------------------------------------------------------------------------------------------------------------------------------------------------------------------------------------------------------------------------------------------------------------------------------------------------------------------------------------------------------------------------------------------------------------------------------------------------|-------------------------------------------------------------------------------------------------------------------------------------------------------------------------------------------------------------------------------------------------------------------------------------------------------------------------------------------------------------------------------------------------------------------------------------------------------------------------------------------------------------|
| <p>6. PROTECTIVE ACTION</p> <p>GUIDANCE: What are the specific actions people receiving the message should take?</p> | <ul style="list-style-type: none"> <li>• BE READY to [evacuate/leave] [location] when advised by local officials</li> <li>• CLOSE doors and windows</li> <li>• DO NOT use [route]. Roads are blocked</li> <li>• IF you are alone and unable to [evacuate, etc.], contact local authorities at [contact info]</li> <li>• LEAVE areas near [location]</li> <li>•</li> <li>• MAKE a plan for your pets or other animals. Visit [URL] for a list of shelters that accept animals.</li> <li>• MOVE in a [directional] direction to avoid [fumes/smoke/fire/ash]</li> <li>• MOVE toward [location]</li> <li>• PREPARE by getting your essential documents, including: [birth certificate, passports, driver’s license, social security card, insurance cards, etc.] and [taking/keeping] them with you</li> <li>• PREPARE now by getting essential supplies for you and those in your care, including pets and babies: [food, water, cash, medication, gas, glasses/contacts, hearing aids, pet supplies, pet carriers, baby supplies, etc.] and [take/keep] them with you</li> </ul> | <ul style="list-style-type: none"> <li>• CALL or text [phone number] if you or others are [injured/in danger/trapped/buried/have an emergency]</li> <li>• DO NOT enter [location]</li> <li>• DO NOT use [route]. Roads are blocked</li> <li>• IF you are alone and unable to [evacuate, etc.], contact local authorities at [contact info]</li> <li>• LEAVE areas near [location]</li> <li>• MOVE in a [directional] direction to avoid [fumes/smoke/fire/ash]</li> <li>• MOVE toward [location]</li> </ul> |
|----------------------------------------------------------------------------------------------------------------------|---------------------------------------------------------------------------------------------------------------------------------------------------------------------------------------------------------------------------------------------------------------------------------------------------------------------------------------------------------------------------------------------------------------------------------------------------------------------------------------------------------------------------------------------------------------------------------------------------------------------------------------------------------------------------------------------------------------------------------------------------------------------------------------------------------------------------------------------------------------------------------------------------------------------------------------------------------------------------------------------------------------------------------------------------------------------------------|-------------------------------------------------------------------------------------------------------------------------------------------------------------------------------------------------------------------------------------------------------------------------------------------------------------------------------------------------------------------------------------------------------------------------------------------------------------------------------------------------------------|



|                                                                                     |                                                                                                                   |                                                                                                        |
|-------------------------------------------------------------------------------------|-------------------------------------------------------------------------------------------------------------------|--------------------------------------------------------------------------------------------------------|
| <p>7. TIME: When should people take protective action? Will the message expire?</p> | <p>NOW; before ## (AM/PM); until ## (AM/PM)</p>                                                                   | <p>NOW; before ## (AM/PM); until ## (AM/PM)</p>                                                        |
| <p>8. ADDITIONAL GUIDANCE: Where should people go for updates?</p>                  | <ul style="list-style-type: none"> <li>• CHECK [source] for [updates/information] at [info]</li> <li>•</li> </ul> | <ul style="list-style-type: none"> <li>• CHECK [source] for [updates/information] at [info]</li> </ul> |

**Pre-event Message Template**

- [Source] [[WILDFIRE WARNING], [Level 1 Level 2, Level 3], [Ready, Set, Go], [Mandatory/Voluntary Evacuation]]. Visibility in area will be reduced and roads/evacuation routes can become blocked; if you do not leave [now/by [time]], you could be trapped, injured, or killed. BE READY to [evacuate/leave] [location] when advised by local officials. PREPARE now by getting essential supplies for you and those in your care, including pets and babies: [food, water, cash, medication, gas, glasses/contacts, hearing aids, pet supplies, pet carriers, baby supplies, etc.] and [take/keep] them with you.

**During/Post Event Message Template**

- [Source] [[WILDFIRE WARNING], [Level 1 Level 2, Level 3], [Ready, Set, Go], [Mandatory/Voluntary Evacuation]]. Visibility in area will be reduced and roads/evacuation routes can become blocked; if you do not leave now, you could be trapped, injured, or killed. LEAVE areas near [location]. MOVE in a [directional] direction to avoid [fumes/smoke/fire/ash]. DO NOT use [route]. Roads are blocked.

## Appendix S2. Websites Referenced during the Development and Verification of Hazard Impact Statements and Protective Action Guidance Statements

American Red Cross. n.d. "Wildfire Safety." Accessed March 16, 2023a. <https://www.redcross.org/get-help/how-to-prepare-for-emergencies/types-of-emergencies/wildfire.html>.

American Red Cross. n.d. "Power Outage Safety." Accessed March 16, 2023b. <https://www.redcross.org/get-help/how-to-prepare-for-emergencies/types-of-emergencies/power-outage.html>.

American Red Cross. n.d. "Landslide Safety." Accessed March 16, 2023c. <https://www.redcross.org/get-help/how-to-prepare-for-emergencies/types-of-emergencies/landslide.html>.

American Red Cross. n.d. "Hurricane Safety." Accessed March 16, 2023d. <https://www.redcross.org/get-help/how-to-prepare-for-emergencies/types-of-emergencies/hurricane.html>.

American Red Cross. n.d. "Heat Wave Safety." Accessed March 16, 2023e. <https://www.redcross.org/get-help/how-to-prepare-for-emergencies/types-of-emergencies/heat-wave-safety.html>.

American Red Cross. n.d. "Flood Safety." Accessed March 16, 2023f. <https://www.redcross.org/get-help/how-to-prepare-for-emergencies/types-of-emergencies/flood.html>.

American Red Cross. n.d. "Earthquake Safety." Accessed March 16, 2023g. <https://www.redcross.org/get-help/how-to-prepare-for-emergencies/types-of-emergencies/earthquake.html>.

American Red Cross. n.d. "Winter Storm Safety." Accessed March 16, 2023h. <https://www.redcross.org/get-help/how-to-prepare-for-emergencies/types-of-emergencies/winter-storm.html>.

American Red Cross. n.d. "Chemical Emergency Preparedness." Accessed March 16, 2023i. <https://www.redcross.org/get-help/how-to-prepare-for-emergencies/types-of-emergencies/chemical-emergency.html>.

American Red Cross. n.d. "Tornado Safety." Accessed March 16, 2023j. <https://www.redcross.org/get-help/how-to-prepare-for-emergencies/types-of-emergencies/tornado.html>.

American Red Cross. n.d. "Tsunami Preparedness." Accessed March 16, 2023k. <https://www.redcross.org/get-help/how-to-prepare-for-emergencies/types-of-emergencies/tsunami.html>.

- American Red Cross. n.d. “Volcano Preparedness.” Accessed March 16, 2023. <https://www.redcross.org/get-help/how-to-prepare-for-emergencies/types-of-emergencies/volcano.html>.
- CDC. 2019. “Winter Weather.” Accessed March 16, 2023. <https://www.cdc.gov/disasters/winter/index.html>.
- FEMA. 2021. “Floods.” Accessed March 16, 2023. <https://www.ready.gov/floods>.
- FEMA. 2022a. “Avalanche.” Accessed March 16, 2023. <https://www.ready.gov/avalanche>.
- FEMA. 2022b. “Extreme Heat.” Accessed March 16, 2023. <https://www.ready.gov/heat>.
- FEMA. 2022c. “Hurricanes.” Accessed March 16, 2023. <https://www.ready.gov/hurricanes>.
- FEMA. 2022d. “Pandemics.” Accessed March 16, 2023. <https://www.ready.gov/pandemic>.
- FEMA. 2022e. “Thunderstorms & Lightning.” Accessed March 16, 2023. <https://www.ready.gov/thunderstorms-lightning>.
- FEMA. 2022f. “Tornadoes.” Accessed March 16, 2023. <https://www.ready.gov/tornadoes>.
- FEMA. 2022g. “Tsunamis.” Accessed March 16, 2023. <https://www.ready.gov/tsunamis>.
- FEMA. 2022h. “Volcanoes.” Accessed March 16, 2023. <https://www.ready.gov/volcanoes>.
- FEMA. 2022i. “Wildfires.” Accessed March 16, 2023. <https://www.ready.gov/wildfires>.
- FEMA. 2022j. “Winter Weather.” Accessed March 16, 2023. <https://www.ready.gov/winter-weather>.
- FEMA. 2023a. “Biohazard Exposure.” Accessed March 16, 2023. <https://www.ready.gov/biohazard>.
- FEMA. 2023b. “Chemicals and Hazardous Materials Incidents.” Accessed March 16, 2023. <https://www.ready.gov/hazmat>.
- FEMA. 2023c. “Earthquakes.” Accessed March 16, 2023. <https://www.ready.gov/earthquakes>.
- FEMA. 2023d. “Power Outages.” Accessed March 16, 2023. <https://www.ready.gov/power-outages>.

- FEMA Preparedness Community. n.d. "Avalanche." Accessed March 16, 2023a.  
<https://community.fema.gov/ProtectiveActions/s/article/Avalanche>.
- FEMA Preparedness Community. n.d. "Flood." Accessed March 16, 2023b.  
<https://community.fema.gov/ProtectiveActions/s/article/Flood>.
- FEMA Preparedness Community. n.d. "Hurricane." Accessed March 16, 2023c. <https://community.fema.gov/ProtectiveActions/s/>.
- FEMA Preparedness Community. n.d. "Novel Pandemic." Accessed March 16, 2023d.  
<https://community.fema.gov/ProtectiveActions/s/article/Novel-Pandemic>.
- FEMA Preparedness Community. n.d. "Thunderstorm, Lightning, and Hail." Accessed March 16, 2023e.  
<https://community.fema.gov/ProtectiveActions/s/article/Thunderstorm-Lightning-and-Hail>.
- FEMA Preparedness Community. n.d. "Tornado." Accessed March 16, 2023f.  
<https://community.fema.gov/ProtectiveActions/s/article/Tornado>.
- FEMA Preparedness Community. n.d. "Active Shooter." Accessed March 16, 2023g.  
<https://community.fema.gov/ProtectiveActions/s/article/Active-Shooter>.
- FEMA Preparedness Community. n.d. "Earthquake." Accessed March 16, 2023h.  
<https://community.fema.gov/ProtectiveActions/s/article/Earthquake>.
- FEMA Preparedness Community. n.d. "Landslide." Accessed March 16, 2023i.  
<https://community.fema.gov/ProtectiveActions/s/article/Landslide>.
- FEMA Preparedness Community. n.d. "Tsunami." Accessed March 16, 2023j.  
<https://community.fema.gov/ProtectiveActions/s/article/Tsunami>.
- FEMA Preparedness Community. n.d. "Volcano." Accessed March 16, 2023k.  
<https://community.fema.gov/ProtectiveActions/s/article/Volcano>.
- FEMA Preparedness Community. n.d. "Wildfire." Accessed March 16, 2023l.  
<https://community.fema.gov/ProtectiveActions/s/article/Wildfire>.

FEMA Preparedness Community. n.d. “Winter Storm.” Accessed March 16, 2023m.  
<https://community.fema.gov/ProtectiveActions/s/article/Winter-Storm>.

National Weather Service. n.d. “Winter Resources.” Accessed March 16, 2023a. <https://www.weather.gov/safety/winter>.

National Weather Service. n.d. “Cold Weather Safety.” Accessed March 16, 2023b. <https://www.weather.gov/safety/cold>.

National Weather Service. n.d. “Snow Squall.” Accessed March 16, 2023c. <https://www.weather.gov/safety/winter-snow-squall>.

National Weather Service. n.d. “During an Air Quality Alert.” Accessed March 16, 2023d. <https://www.weather.gov/safety/airquality-during>.

National Weather Service. n.d. “Ice Storms.” Accessed March 16, 2023e. <https://www.weather.gov/safety/winter-ice-frost>.

National Weather Service. n.d. “Why Air Quality Is Important.” Accessed March 16, 2023f.  
<https://www.weather.gov/safety/airquality>.
